# Supplementary material for: A high surface area silica-supported aldehyde as a flow-compatible amine scavenger
Source: Royal Society of Chemistry journal article supplement (doi:10.1039/d6ra04582k), 2026-06-08

## A) A High Surface Area Silica-Supported Aldehyde as a Flow-Compatible Amine Scavenger

A. Michelle Reinhardt,<sup>a,c</sup> Jenny-Lee Panayides<sup>c</sup> and Darren L. Riley<sup>a\*</sup>

### Supplementary Information

|       |                                                                                          |    |
|-------|------------------------------------------------------------------------------------------|----|
| A)    | A High Surface Area Silica-Supported Aldehyde as a Flow-Compatible Amine Scavenger ..... | 1  |
| A-1   | Quantitative LC.....                                                                     | 2  |
| A-1.1 | Calibration curve of <i>N</i> -benzylamine .....                                         | 2  |
| A-1.2 | Quantification of <i>N</i> -benzylamine.....                                             | 6  |
| A-2   | BET results: Isotherm, Particle size distribution and Pore Size vs Pore Volume .....     | 9  |
| A-2.1 | Silica .....                                                                             | 9  |
| A-2.2 | SSA-3 .....                                                                              | 11 |
| A-2.3 | SSA-4 .....                                                                              | 13 |
| A-2.4 | SSA-5 .....                                                                              | 15 |
| A-2.5 | SSA-6 .....                                                                              | 17 |
| A-2.6 | SSA-7 .....                                                                              | 19 |
| A-2.7 | Combinations .....                                                                       | 21 |
| A-3   | TGA and DSC results .....                                                                | 24 |
| A-3.1 | Silica .....                                                                             | 24 |
| A-3.2 | SSA-3 .....                                                                              | 25 |
| A-3.3 | SSA-4 .....                                                                              | 27 |
| A-3.4 | SSA-5 .....                                                                              | 28 |
| A-3.5 | SSA-6 .....                                                                              | 30 |
| A-3.6 | SSA-7 .....                                                                              | 31 |
| A-3.7 | Combinations .....                                                                       | 33 |
| A-4   | PXRD results .....                                                                       | 41 |
| A-4.1 | Silica .....                                                                             | 41 |
| A-4.2 | SSA-3 .....                                                                              | 42 |
| A-4.3 | SSA-4 .....                                                                              | 43 |
| A-4.4 | SSA-5 .....                                                                              | 44 |
| A-4.5 | SSA-6 .....                                                                              | 45 |
| A-4.6 | SSA-7 .....                                                                              | 46 |
| A-4.7 | Combinations .....                                                                       | 47 |
| A-5   | SEM results.....                                                                         | 56 |
| A-5.1 | Silica .....                                                                             | 56 |
| A-5.2 | SSA-3 .....                                                                              | 57 |

|       |                           |    |
|-------|---------------------------|----|
| A-5.3 | SSA-4 .....               | 58 |
| A-5.4 | SSA-5 .....               | 59 |
| A-5.5 | SSA-6 .....               | 60 |
| A-5.6 | SSA-7 .....               | 61 |
| A-6   | IR results .....          | 62 |
| A-6.1 | Silica .....              | 62 |
| A-6.2 | SSA-3 .....               | 62 |
| A-6.3 | SSA-4 .....               | 63 |
| A-6.4 | SSA-5 .....               | 63 |
| A-6.5 | SSA-6 .....               | 64 |
| A-6.6 | SSA-7 .....               | 64 |
| A-6.7 | Combinations .....        | 65 |
| A-7   | Qualitative results ..... | 74 |
| A-8   | DoE .....                 | 74 |
| A-9   | DoE data .....            | 75 |

## A-1 Quantitative LC

### A-1.1 Calibration curve of *N*-benzylamine

Benzylamine was made to six concentrations and was performed in triplicate as a precision measure for sample preparation. All calibration samples were prepared with an internal control to ensure instrumental precision.

In a 10.00 mL volumetric flask, 100.00 mg of the compound in question was dissolved in HPLC acetonitrile or ACN: MeOH (1:1) and filled to the calibration mark, producing a 10 mg.mL<sup>-1</sup> solution. A 2.00 mL fraction of sample A was transferred to a second 10 mL volumetric flask and filled to the calibration mark with HPLC acetonitrile, producing a 2 mg.mL<sup>-1</sup> solution. Two sub-dilutions were prepared from sample B. A 1.00 mL fraction of sample B was transferred into a third 10 mL volumetric flask and filled up to the calibration mark, resulting in a 0.2 mg.mL<sup>-1</sup> solution. A 2.00 mL fraction of sample B was transferred into a fourth 10 mL volumetric flask and filled up to the calibration mark, resulting in a 0.4 mg.mL<sup>-1</sup> solution.

Three fractions from Sample C were transferred into three separate vials; 40 µL into E (8 µg.mL<sup>-1</sup>), 80 µL into F (16 µg.mL<sup>-1</sup>) and 160 µL into G (32 µg.mL<sup>-1</sup>). Samples E, F and G were prepared in triplicate. To each vial, 100 µL of a 0.2 µg.mL<sup>-1</sup> solution of anisole was added. The vials were filled up with the volume difference to make 1.0 mL LC samples.

Three fractions from Sample D were transferred into three separate vials; 120 µL into H (48 µg/mL), 160 µL into I (64 µg/mL) and 200 µL into J (80 µg/mL). Samples H, I and J were prepared in triplicate. To each vial, 100 µL of a 0.2 µg/mL solution of anisole was added. The vials were filled up with the volume difference to make 1.0 mL LC samples.

## A-1.1.1 Method

A mixture of *N*-benzylamine and anisole was separated. A representative chromatogram is shown below (Figure A.1) which shows retention times for *N*-benzylamine as 1.529 min and anisole as 3.045 min.

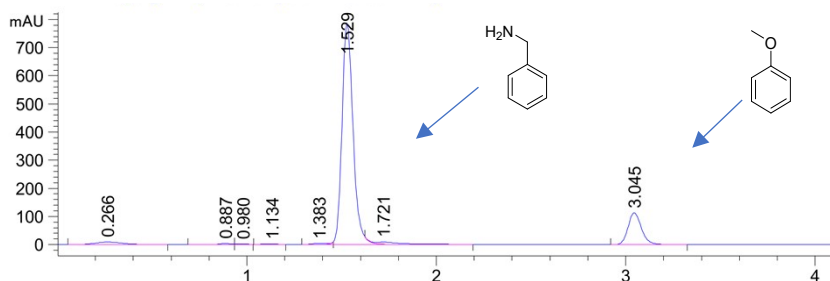

Figure A.1: Representative chromatogram of *N*-benzylamine and Anisole

The calibration curves for *N*-benzylamine and anisole were performed with the use of the solvent system described in table A.1. The column oven temperature was controlled at 40 °C. The flowrate was set at 1.00 mL.min<sup>-1</sup> with a run time of 4.00 minutes and a sampling volume of 5.00 µL. Mass spectra were obtained for each peak during method development but was bypassed during the generation of the calibration curve because quantification was based on UV-VIS absorption and not on results from mass spectra. This was done due to the fact that quantification would be performed on crude reaction mixtures and we deemed it fit to bypass the MS for these samples for instrument preservation.

Table A.1: Solvent system and volumetric ratios used for method

|          | Solvent system                                                                    | Volumetric ratio (%) |
|----------|-----------------------------------------------------------------------------------|----------------------|
| <b>A</b> | Organic (50:50 Acetonitrile: Methanol)                                            | 50                   |
| <b>B</b> | Aqueous Buffered (90:5:5 Aqueous phosphate buffer (10mM): Acetonitrile: Methanol) | 40                   |
| <b>C</b> | Acetonitrile (100%)                                                               | 0                    |
| <b>D</b> | Aqueous (90:5:5 Water: Acetonitrile: Methanol)                                    | 10                   |

A-1.1.2 Calibration curve of *N*-benzylamine

The calibration curve of *N*-benzylamine was generated with method above. The samples were prepared in triplicate and a peak area was recorded for each sample. As an internal control, all samples were analyzed with Anisole. *N*-benzylamine was quantified at a wavelength of 210 nm and anisole at a wavelength of 250 nm.

The average area was calculated for each concentration manually (Table A.2). The area was plotted as a function of concentration. A line of best fit was included with a y-intercept set at zero. The slope of the line of best fit was found to be 38.833 with a regression of 0.9985 (Graph A.1). The slope of the line of best fit was used in the quantification calculations.

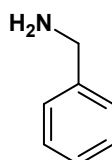

N-benzylamine  
107,1531 g/mol

Scheme F.1: Structure of N-benzylamine with molar mass

Table A.2: Absorbance area data for each sample and average area for each concentration of N-benzylamine and Anisole control

| Concentration           | Repeat         | Area (mAU*s)                       |                                     |
|-------------------------|----------------|------------------------------------|-------------------------------------|
|                         |                | N-Benzylamine (1.529 min) (210 nm) | Anisole control (3.045min) (250 nm) |
| 8 ppm<br>(0.008 mg/mL)  | A              | 290,62704                          | 30,81436                            |
|                         | B              | 275,70724                          | 30,43671                            |
|                         | C              | 288,02319                          | 30,75514                            |
|                         | <b>Average</b> | <b>284,7858233</b>                 | <b>30,66873667</b>                  |
| 16 ppm<br>(0.016 mg/mL) | A              | 521,78662                          | 28,49541                            |
|                         | B              | 513,45728                          | 28,5079                             |
|                         | C              | 587,82275                          | 31,41241                            |
|                         | <b>Average</b> | <b>541,0222167</b>                 | <b>29,47190667</b>                  |
| 32 ppm<br>(0.032 mg/mL) | A              | 1182,59167                         | 31,54969                            |
|                         | B              | 1059,40552                         | 28,24783                            |
|                         | C              | 1065,75537                         | 28,66535                            |
|                         | <b>Average</b> | <b>1102,584187</b>                 | <b>29,48762333</b>                  |
| 48 ppm<br>(0.048 mg/mL) | A              | 1865,9563                          | 28,0777                             |
|                         | B              | 1825,48547                         | 27,56844                            |
|                         | C              | 1861,00989                         | 28,81656                            |
|                         | <b>Average</b> | <b>1850,81722</b>                  | <b>28,15423333</b>                  |
| 64 ppm<br>(0.064 mg/mL) | A              | 2530,54248                         | 28,36065                            |
|                         | B              | 2504,09912                         | 28,21263                            |
|                         | C              | 2517,97192                         | 28,38569                            |
|                         | <b>Average</b> | <b>2517,53784</b>                  | <b>28,31965667</b>                  |
| 80 ppm<br>(0.080 mg/mL) | A              | 3188,02783                         | 28,36313                            |
|                         | B              | 3192,72534                         | 28,24411                            |
|                         | C              | 3109,69067                         | 28,84111                            |
|                         | <b>Average</b> | <b>3163,48128</b>                  | <b>28,48278333</b>                  |

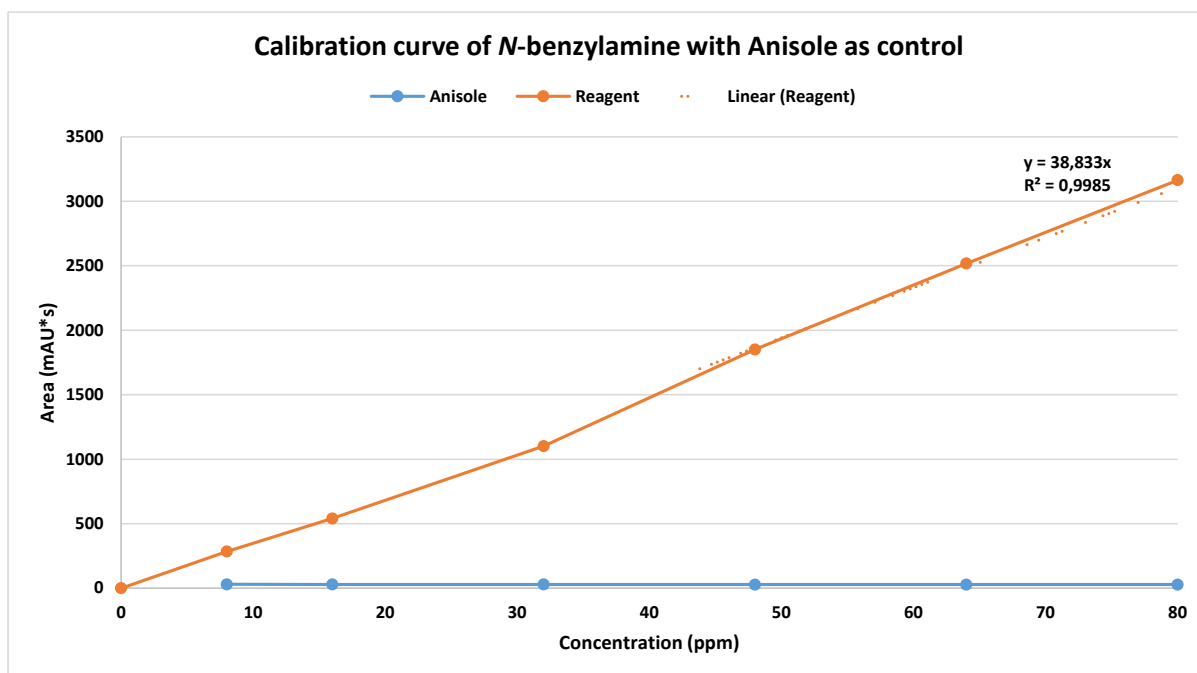

Graph A.1: Calibration curve of N-benzylamine (orange) and anisole (blue) as a control

A-1.2 Quantification of *N*-benzylamine

Table A.3: Dilutions and conversion calculations

| Sample         | Area                            | [LC sample] (ppm)                                                                    | Dilution factor code                                                                                  | Dilution Factor | [Rxn sample]                                                                                          | [Rxn sample] | Volume of reaction sample          | Total mass                                             | Total moles                                             | Collection scale                                                                      | Absorbed moles                                        | Percentage unabsorbed moles                       |
|----------------|---------------------------------|--------------------------------------------------------------------------------------|-------------------------------------------------------------------------------------------------------|-----------------|-------------------------------------------------------------------------------------------------------|--------------|------------------------------------|--------------------------------------------------------|---------------------------------------------------------|---------------------------------------------------------------------------------------|-------------------------------------------------------|---------------------------------------------------|
| Unit           | A                               | B                                                                                    | C                                                                                                     | D               | E                                                                                                     | F            | G                                  | H                                                      | I                                                       | J                                                                                     | K                                                     | L                                                 |
| Description    | Area given from LC chromatogram | Calculated concentration of analyte in LC sample based on area given by chromatogram | Concentration of reaction sample divided by the final diluted concentration of the analysed LC sample |                 | Calculated concentration of analyte in original reaction solution based on area given by chromatogram |              | Volume of original reaction sample | Calculated Mass of analyte in original reaction sample | Calculated moles of analyte in original reaction sample | Theoretical Moles per reaction collection vial of limiting reagent (investment moles) | Moles that was retained in polymer and was not eluted | Percentage moles that was not retained in polymer |
| Formula        | -                               | A/38.833                                                                             | From dilution factor table                                                                            |                 | B x D                                                                                                 | E/1000       | -                                  | F x G                                                  | (H/1000)/107.1531                                       | From dilution factor table                                                            | I - J                                                 | (I/J) x 100                                       |
| 1 polymer test | 767,04913                       | 19,75250766                                                                          | PDF001                                                                                                | 20              | 395,0501532                                                                                           | 0,395050153  | 25                                 | 9,87625383                                             | 9,21696E-05                                             | 0,0004                                                                                | 0,00030783                                            | 23,04238942                                       |
| 2 polymer test | 908,43884                       | 23,39347565                                                                          | PDF001                                                                                                | 20              | 467,869513                                                                                            | 0,467869513  | 25                                 | 11,6967378                                             | 0,000109159                                             | 0,0004                                                                                | 0,000290841                                           | 27,28977936                                       |
| 3 polymer test | 929,54144                       | 23,93689491                                                                          | PDF001                                                                                                | 20              | 478,7378982                                                                                           | 0,478737898  | 25                                 | 11,9684475                                             | 0,000111695                                             | 0,0004                                                                                | 0,000288305                                           | 27,92370789                                       |
| 4 polymer test | 742,42902                       | 19,11850797                                                                          | PDF001                                                                                                | 20              | 382,3701594                                                                                           | 0,382370159  | 25                                 | 9,55925399                                             | 8,92112E-05                                             | 0,0004                                                                                | 0,000310789                                           | 22,30279382                                       |
| Partition 1    | 54,19356                        | 1,395554297                                                                          | PDF002                                                                                                | 267,3796791     | 373,1428601                                                                                           | 0,37314286   | 1                                  | 0,37314286                                             | 3,48233E-06                                             | 0,0004                                                                                | 0,000396518                                           | 0,870583446                                       |
| Partition 2    | 39,61137                        | 1,020044035                                                                          | PDF002                                                                                                | 267,3796791     | 272,7390467                                                                                           | 0,272739047  | 1                                  | 0,27273905                                             | 2,54532E-06                                             | 0,0004                                                                                | 0,000397455                                           | 0,636330276                                       |
| Partition 3    | 43,3489                         | 1,116290269                                                                          | PDF002                                                                                                | 267,3796791     | 298,473338                                                                                            | 0,298473338  | 1                                  | 0,29847333                                             | 2,78548E-06                                             | 0,0004                                                                                | 0,000397215                                           | 0,696371206                                       |
| Partition 4    | 41,83158667                     | 1,077217487                                                                          | PDF002                                                                                                | 267,3796791     | 288,026066                                                                                            | 0,288026066  | 1                                  | 0,28802607                                             | 2,68799E-06                                             | 0,0004                                                                                | 0,000397312                                           | 0,671996578                                       |
| Partition 5    | 43,93217333                     | 1,131310312                                                                          | PDF002                                                                                                | 267,3796791     | 302,4893881                                                                                           | 0,302489388  | 1                                  | 0,30248939                                             | 2,82926E-06                                             | 0,0004                                                                                | 0,000397177                                           | 0,705741103                                       |
| Partition 6    | 40,44244333                     | 1,041445248                                                                          | PDF002                                                                                                | 267,3796791     | 278,4612964                                                                                           | 0,278461296  | 1                                  | 0,2784613                                              | 2,59872E-06                                             | 0,0004                                                                                | 0,000397401                                           | 0,649680915                                       |
| Partition 7    | 41,28297                        | 1,063089898                                                                          | PDF002                                                                                                | 267,3796791     | 284,2486358                                                                                           | 0,284248636  | 1                                  | 0,28424864                                             | 2,65273E-06                                             | 0,0004                                                                                | 0,000397347                                           | 0,663183416                                       |
| Loading cap 1  | 163,7425367                     | 4,216582202                                                                          | PDF003                                                                                                | 134,0482574     | 565,2254963                                                                                           | 0,565225496  | 1                                  | 0,5652255                                              | 5,27493E-06                                             | 0,0004                                                                                | 0,000394725                                           | 1,31873342                                        |
| Loading cap 2  | 127,5750233                     | 3,285221933                                                                          | PDF003                                                                                                | 134,0482574     | 440,3782752                                                                                           | 0,440378275  | 1                                  | 0,44037828                                             | 4,1098E-06                                              | 0,0004                                                                                | 0,00039589                                            | 1,027451085                                       |
| Loading cap 3  | 154,9674567                     | 3,990612537                                                                          | PDF003                                                                                                | 134,0482574     | 534,9346565                                                                                           | 0,534934656  | 1                                  | 0,53493466                                             | 4,99225E-06                                             | 0,0004                                                                                | 0,000395008                                           | 1,24806155                                        |
| Loading cap 4  | 176,4804533                     | 4,544600039                                                                          | PDF003                                                                                                | 134,0482574     | 609,1957157                                                                                           | 0,609195716  | 1                                  | 0,60919572                                             | 5,68528E-06                                             | 0,0004                                                                                | 0,000394315                                           | 1,421320792                                       |
| Loading cap 5  | 240,12392                       | 6,183501661                                                                          | PDF003                                                                                                | 134,0482574     | 828,8876221                                                                                           | 0,828887622  | 1                                  | 0,82888762                                             | 7,73554E-06                                             | 0,0004                                                                                | 0,000392264                                           | 1,933886239                                       |
| Loading cap 6  | 221,9675833                     | 5,715952497                                                                          | PDF003                                                                                                | 134,0482574     | 766,2134715                                                                                           | 0,766213472  | 1                                  | 0,76621347                                             | 7,15064E-06                                             | 0,0004                                                                                | 0,000392849                                           | 1,787660533                                       |
| Loading cap 7  | 263,2082967                     | 6,777954231                                                                          | PDF003                                                                                                | 134,0482574     | 908,5729533                                                                                           | 0,908572953  | 1                                  | 0,90857295                                             | 8,4792E-06                                              | 0,0004                                                                                | 0,000391521                                           | 2,119809005                                       |
| Loading cap 8  | 264,1973233                     | 6,803422948                                                                          | PDF005                                                                                                | 134,0482574     | 911,9869903                                                                                           | 0,91198699   | 2                                  | 1,82397398                                             | 1,70221E-05                                             | 0,0004                                                                                | 0,000382978                                           | 4,255532459                                       |
| Loading cap 9  | 346,7359433                     | 8,928899218                                                                          | PDF004                                                                                                | 160,7717042     | 1435,514344                                                                                           | 1,435514344  | 4                                  | 5,74205737                                             | 5,35874E-05                                             | 0,0004                                                                                | 0,000346413                                           | 13,39685314                                       |
| DOE1-pol-N1    | 677,053955                      | 17,43501545                                                                          | PDF006                                                                                                | 160,7717042     | 2803,057146                                                                                           | 2,803057146  | 4                                  | 11,2122286                                             | 0,000104637                                             | 0,0004                                                                                | 0,000295363                                           | 26,15936586                                       |
| DOE1-pol-N2    | 51,18441                        | 1,31806479                                                                           | PDF015                                                                                                | 5               | 6,590323951                                                                                           | 0,006590324  | 1                                  | 0,00659032                                             | 6,15038E-08                                             | 0,0004                                                                                | 0,000399938                                           | 0,015375953                                       |
| DOE1-pol-N3    | 503,0621                        | 12,95450004                                                                          | PDF007                                                                                                | 160,7717042     | 2082,717048                                                                                           | 2,082717048  | 25                                 | 52,0679262                                             | 0,000485921                                             | 0,002                                                                                 | 0,001514079                                           | 24,29604286                                       |
| DOE1-pol-N4    | 3223,879635                     | 83,01907231                                                                          | PDF008                                                                                                | 160,7717042     | 13347,11773                                                                                           | 13,34711773  | 4                                  | 53,3884709                                             | 0,000498245                                             | 0,002                                                                                 | 0,001501755                                           | 24,91223816                                       |
| DOE1-pol-N5    | 101,627045                      | 2,617027914                                                                          | PDF009                                                                                                | 100             | 261,7027914                                                                                           | 0,261702791  | 1                                  | 0,26170279                                             | 2,44233E-06                                             | 0,0004                                                                                | 0,000397558                                           | 0,610581475                                       |
| DOE1-pol-N6    | 45,233115                       | 1,164811243                                                                          | PDF009                                                                                                | 100             | 116,4811243                                                                                           | 0,116481124  | 1                                  | 0,11648112                                             | 1,08705E-06                                             | 0,0004                                                                                | 0,000398913                                           | 0,271763309                                       |
| DOE1-pol-N7    | 38,89594                        | 1,001620786                                                                          | PDF010                                                                                                | 100             | 100,1620786                                                                                           | 0,100162079  | 1                                  | 0,10016208                                             | 9,34757E-07                                             | 0,002                                                                                 | 0,001999065                                           | 0,046737835                                       |
| DOE1-pol-N8    | 49,901265                       | 1,285022146                                                                          | PDF010                                                                                                | 100             | 128,5022146                                                                                           | 0,128502215  | 1                                  | 0,12850221                                             | 1,19924E-06                                             | 0,002                                                                                 | 0,001998801                                           | 0,059961968                                       |
| DOE1-pol-N9    | 6,287735                        | 0,161917313                                                                          | PDF009                                                                                                | 20              | 3,238346252                                                                                           | 0,003238346  | 1                                  | 0,00323835                                             | 3,02217E-08                                             | 0,0004                                                                                | 0,000399997                                           | 0,007555419                                       |
| DOE1-pol-N10   | 101,652475                      | 2,61768277                                                                           | PDF009                                                                                                | 20              | 52,3536554                                                                                            | 0,052353655  | 1                                  | 0,05235366                                             | 4,88587E-07                                             | 0,0004                                                                                | 0,000399511                                           | 0,122146852                                       |
| DOE1-pol-N11   | 114,336805                      | 2,944320681                                                                          | PDF010                                                                                                | 20              | 58,88641362                                                                                           | 0,058886414  | 1                                  | 0,05888641                                             | 5,49554E-07                                             | 0,002                                                                                 | 0,001999445                                           | 0,027477699                                       |
| DOE1-pol-N12   | 13,10226                        | 0,337400149                                                                          | PDF010                                                                                                | 20              | 6,748002987                                                                                           | 0,006748003  | 1                                  | 0,006748                                               | 6,29753E-08                                             | 0,002                                                                                 | 0,001999937                                           | 0,003148767                                       |
| DOE1-pol-N13   | 6,89546                         | 0,177567018                                                                          | PDF009                                                                                                | 100             | 17,75670177                                                                                           | 0,017756702  | 1                                  | 0,0177567                                              | 1,65713E-07                                             | 0,0004                                                                                | 0,000399834                                           | 0,041428344                                       |
| DOE1-pol-N14   | 15,247185                       | 0,392634744                                                                          | PDF009                                                                                                | 100             | 39,26347436                                                                                           | 0,039263474  | 1                                  | 0,03926347                                             | 3,66424E-07                                             | 0,0004                                                                                | 0,000399634                                           | 0,091606016                                       |
| DOE1-pol-N15   | 348,72255                       | 8,98005691                                                                           | PDF011                                                                                                | 100             | 898,005691                                                                                            | 0,898005691  | 4                                  | 3,59202276                                             | 3,3523E-05                                              | 0,002                                                                                 | 0,001966478                                           | 1,676117053                                       |

|                   |             |             |        |     |             |             |    |            |             |        |             |             |
|-------------------|-------------|-------------|--------|-----|-------------|-------------|----|------------|-------------|--------|-------------|-------------|
| DOE1-pol-N16      | 34,10644    | 0,878284964 | PDF010 | 100 | 87,82849638 | 0,087828496 | 1  | 0,0878285  | 8,19654E-07 | 0,002  | 0,00199918  | 0,040982714 |
| DOE1-pol-N17      | 3888,80615  | 100,1417905 | PDF012 | 20  | 2002,83581  | 2,00283581  | 10 | 20,0283581 | 0,000186913 | 0,0012 | 0,001013087 | 15,57612278 |
| DOE1-pol-N18      | 4472,891605 | 115,1827468 | PDF013 | 20  | 2303,654935 | 2,303654935 | 10 | 23,0365494 | 0,000214987 | 0,002  | 0,001785013 | 10,74936206 |
| DOE1-pol-N19      | 3198,91565  | 82,37621739 | PDF014 | 20  | 1647,524348 | 1,647524348 | 10 | 16,4752435 | 0,000153754 | 0,0012 | 0,001046246 | 12,81285335 |
| DOE1-pol-N20      | 2826,13672  | 72,77667757 | PDF014 | 20  | 1455,533551 | 1,455533551 | 10 | 14,5553355 | 0,000135837 | 0,0012 | 0,001064163 | 11,31973434 |
| DOE1-pol-N21      | 2816,791135 | 72,53601666 | PDF014 | 20  | 1450,720333 | 1,450720333 | 10 | 14,5072033 | 0,000135388 | 0,0012 | 0,001064612 | 11,28230178 |
| DOE1-pol-N22      | 3380,22607  | 87,04519532 | PDF014 | 20  | 1740,903906 | 1,740903906 | 10 | 17,4090391 | 0,000162469 | 0,0012 | 0,001037531 | 13,53906938 |
| Spent pol part 1  | 0           | 0           | PDF016 | 50  | 0           | 0           | 1  | 0          | 0           | 0,0004 | 0,0004      | 0           |
| Spent pol part 2  | 0           | 0           | PDF016 | 50  | 0           | 0           | 1  | 0          | 0           | 0,0004 | 0,0004      | 0           |
| Spent pol part 3  | 7029,897705 | 181,0289626 | PDF016 | 50  | 9051,44813  | 9,05144813  | 1  | 9,05144813 | 8,44721E-05 | 0,0004 | 0,000315528 | 21,11802675 |
| Spent pol part 4  | 5493,321045 | 141,4601253 | PDF016 | 50  | 7073,006264 | 7,073006264 | 1  | 7,07300626 | 6,60084E-05 | 0,0004 | 0,000333992 | 16,50210368 |
| Spent pol part 5  | 18,37477    | 0,473174104 | PDF016 | 50  | 23,65870522 | 0,023658705 | 1  | 0,02365871 | 2,20793E-07 | 0,0004 | 0,000399779 | 0,055198369 |
| Spent pol part 6  | 11,884465   | 0,306040352 | PDF016 | 50  | 15,30201761 | 0,015302018 | 1  | 0,01530202 | 1,42805E-07 | 0,0004 | 0,000399857 | 0,035701295 |
| Spent pol part 7  | 7,441235    | 0,19162143  | PDF016 | 50  | 9,581071511 | 0,009581072 | 1  | 0,00958107 | 8,94148E-08 | 0,0004 | 0,000399911 | 0,022353697 |
| Spent pol part 8  | 11,553965   | 0,29752955  | PDF016 | 50  | 14,87647748 | 0,014876477 | 1  | 0,01487648 | 1,38834E-07 | 0,0004 | 0,000399861 | 0,034708463 |
| Spent pol part 9  | 9,73908     | 0,250793912 | PDF016 | 50  | 12,53969562 | 0,012539696 | 1  | 0,0125397  | 1,17026E-07 | 0,0004 | 0,000399883 | 0,029256493 |
| Spent pol part 10 | 12,037585   | 0,30998339  | PDF016 | 50  | 15,49916952 | 0,01549917  | 1  | 0,01549917 | 1,44645E-07 | 0,0004 | 0,000399855 | 0,036161272 |
| Spent pol part 11 | 3,679685    | 0,09475665  | PDF016 | 50  | 4,737832514 | 0,004737833 | 1  | 0,00473783 | 4,42155E-08 | 0,0004 | 0,000399956 | 0,011053886 |
| Spent pol part 12 | 13,625635   | 0,350877733 | PDF016 | 50  | 17,54388664 | 0,017543887 | 1  | 0,01754389 | 1,63727E-07 | 0,0004 | 0,000399836 | 0,040931822 |
| Spent pol part 13 | 12,132515   | 0,312427961 | PDF016 | 50  | 15,62139804 | 0,015621398 | 1  | 0,0156214  | 1,45786E-07 | 0,0004 | 0,000399854 | 0,036446444 |
| Spent pol part 14 | 4,34986     | 0,112014524 | PDF016 | 50  | 5,600726186 | 0,005600726 | 1  | 0,00560073 | 5,22684E-08 | 0,0004 | 0,000399948 | 0,013067112 |
| Spent pol part 15 | 0           | 0           | PDF016 | 50  | 0           | 0           | 1  | 0          | 0           | 0,0004 | 0,0004      | 0           |
| Spent pol part 16 | 0           | 0           | PDF016 | 50  | 0           | 0           | 1  | 0          | 0           | 0,0004 | 0,0004      | 0           |
| Spent pol part 17 | 0           | 0           | PDF016 | 50  | 0           | 0           | 1  | 0          | 0           | 0,0004 | 0,0004      | 0           |
| Spent pol part 18 | 0           | 0           | PDF016 | 50  | 0           | 0           | 1  | 0          | 0           | 0,0004 | 0,0004      | 0           |
| Spent pol part 19 | 0           | 0           | PDF016 | 50  | 0           | 0           | 1  | 0          | 0           | 0,0004 | 0,0004      | 0           |
| Spent pol part 20 | 0           | 0           | PDF016 | 50  | 0           | 0           | 1  | 0          | 0           | 0,0004 | 0,0004      | 0           |
| Silica part 1     | 0           | 0           | PDF016 | 50  | 0           | 0           | 1  | 0          | 0           | 0,0004 | 0,0004      | 0           |
| Silica part 2     | 0           | 0           | PDF016 | 50  | 0           | 0           | 1  | 0          | 0           | 0,0004 | 0,0004      | 0           |
| Silica part 3     | 6,26719     | 0,161388252 | PDF016 | 50  | 8,069412613 | 0,008069413 | 1  | 0,00806941 | 7,53073E-08 | 0,0004 | 0,000399925 | 0,01882683  |
| Silica part 4     | 4,06414     | 0,104656864 | PDF016 | 50  | 5,2328432   | 0,005232843 | 1  | 0,00523284 | 4,88352E-08 | 0,0004 | 0,000399951 | 0,0122088   |
| Silica part 5     | 4,258515    | 0,109662272 | PDF016 | 50  | 5,483113589 | 0,005483114 | 1  | 0,00548311 | 5,11708E-08 | 0,0004 | 0,000399949 | 0,012792709 |
| Silica part 6     | 608,431275  | 15,66789264 | PDF016 | 50  | 783,3946321 | 0,783394632 | 1  | 0,78339463 | 7,31098E-06 | 0,0004 | 0,000392689 | 1,827746076 |
| Silica part 7     | 3386,14856  | 87,1977071  | PDF016 | 50  | 4359,885355 | 4,359885355 | 1  | 4,35988536 | 4,06884E-05 | 0,0004 | 0,000359312 | 10,17209338 |
| Silica part 8     | 3352,272095 | 86,32534429 | PDF016 | 50  | 4316,267215 | 4,316267215 | 1  | 4,31626721 | 4,02813E-05 | 0,0004 | 0,000359719 | 10,07032744 |
| Silica part 9     | 1875,064695 | 48,28534223 | PDF016 | 50  | 2414,267112 | 2,414267112 | 1  | 2,41426711 | 2,2531E-05  | 0,0004 | 0,000377469 | 5,632751436 |
| Silica part 10    | 805,648135  | 20,74648199 | PDF016 | 50  | 1037,324099 | 1,037324099 | 1  | 1,0373241  | 9,68077E-06 | 0,0004 | 0,000390319 | 2,420191528 |
| Silica part 11    | 349,438625  | 8,998496768 | PDF016 | 50  | 449,9248384 | 0,449924838 | 1  | 0,44992484 | 4,1989E-06  | 0,0004 | 0,000395801 | 1,049724269 |
| Silica part 12    | 58,909155   | 1,51698697  | PDF016 | 50  | 75,84934849 | 0,075849348 | 1  | 0,07584935 | 7,0786E-07  | 0,0004 | 0,000399292 | 0,176964895 |
| Silica part 13    | 20,451585   | 0,526654778 | PDF016 | 50  | 26,33273891 | 0,026332739 | 1  | 0,02633274 | 2,45749E-07 | 0,0004 | 0,000399754 | 0,061437184 |
| Silica part 14    | 10,371205   | 0,267071949 | PDF016 | 50  | 13,35359746 | 0,013353597 | 1  | 0,0133536  | 1,24622E-07 | 0,0004 | 0,000399875 | 0,031155416 |
| Silica part 15    | 12,924695   | 0,332827621 | PDF016 | 50  | 16,64138104 | 0,016641381 | 1  | 0,01664138 | 1,55305E-07 | 0,0004 | 0,000399845 | 0,038826177 |
| Silica part 16    | 5,69619     | 0,146684263 | PDF016 | 50  | 7,334213169 | 0,007334213 | 1  | 0,00733421 | 6,84461E-08 | 0,0004 | 0,000399932 | 0,017111528 |
| Silica part 17    | 14,584125   | 0,375560091 | PDF016 | 50  | 18,77800453 | 0,018778005 | 1  | 0,018778   | 1,75245E-07 | 0,0004 | 0,000399825 | 0,043811156 |
| Silica part 18    | 12,13399    | 0,312465944 | PDF016 | 50  | 15,6232972  | 0,015623297 | 1  | 0,0156233  | 1,45804E-07 | 0,0004 | 0,000399854 | 0,036450875 |
| Silica part 19    | 2,915645    | 0,075081632 | PDF016 | 50  | 3,75408158  | 0,003754082 | 1  | 0,00375408 | 3,50347E-08 | 0,0004 | 0,000399965 | 0,008758686 |
| Silica part 20    | 3,828675    | 0,098593336 | PDF016 | 50  | 4,929666778 | 0,004929667 | 1  | 0,00492967 | 4,60058E-08 | 0,0004 | 0,000399954 | 0,011501456 |

## A-1.7 LC dilution factors

Table A.4: Calculations of dilution factors

| Flow reaction details    |                                 |                         |                         |                       |                                   |                                          |                                    |                               |                           |                                           | Additional Dilutions after collection |                             |                     |                                           | LC sample Details           |                             |                                        |                           |                            |             | Dilution factor                                          |
|--------------------------|---------------------------------|-------------------------|-------------------------|-----------------------|-----------------------------------|------------------------------------------|------------------------------------|-------------------------------|---------------------------|-------------------------------------------|---------------------------------------|-----------------------------|---------------------|-------------------------------------------|-----------------------------|-----------------------------|----------------------------------------|---------------------------|----------------------------|-------------|----------------------------------------------------------|
| Code                     | [Stock]                         | Rxn scale               | Rxn scale               | Rxn Scale             | Pumps                             | Rxn plug                                 | [Rxn plug]                         | Coll. Vol.                    | Coll. Scale               | [Rxn plug]                                | Initial mol                           | final vol.                  | final []            | final []                                  | Vol. sln                    | Vol. sln.                   | Mass                                   | Tot. vol                  | [LC sample]                | [LC sample] |                                                          |
|                          | A                               | B                       | C                       | D                     | E                                 | F                                        | G                                  | H                             | I                         | J                                         | K                                     | L                           | M                   | N                                         | O                           | P                           | Q                                      | R                         | S                          | T           |                                                          |
| Unit                     | mol/L                           | mL                      | L                       | mol                   | number                            | mL                                       | mol/mL                             | mL                            | mol                       | mg/mL                                     | mol                                   | mL                          | mol/mL              | mg/mL                                     | uL                          | mL                          | mg                                     | ml                        | mg/mL                      | ug/mL       |                                                          |
| Specific dilution factor | Concentration of stock solution | Size of sampling volume | Size of sampling volume | reaction scale in mol | Number of pumps (dilution factor) | Size of reaction plug after mixing point | Concentration of plug after mixing | Volume of collection per vial | Moles per collection vial | Concentration of reaction plug            | initial mol of sample                 | Final volume after dilution | Final concentration | Final concentration                       | volume of reaction solution | volume of reaction solution | mass of reaction solution in LC sample | Total volume of LC sample | Concentration of LC sample | ppm         | Initial concentration divided by the final concentration |
| Formula                  | -                               | -                       | B/1000                  | C x A                 | -                                 | -                                        | D/F                                | -                             | G x H                     | G x MW x 1000<br>MW=<br>107.1531<br>g/mol | = I                                   | -                           | K/L                 | M x MW x 1000<br>MW=<br>107.1531<br>g/mol | -                           | O/1000                      | N x P                                  | -                         | Q/R                        | S x 1000    | N / S                                                    |
| PDF001                   | 0,2                             | 2                       | 0,002                   | 0,0004                | 1                                 | 2                                        | 0,0002                             | 2                             | 0,0004                    | 21,43062                                  | 0,0004                                | 25                          | 0,000016            | 1,714449<br>6                             | 50                          | 0,05                        | 0,08572248                             | 1                         | 0,08572248                 | 85,72248    | 20                                                       |
| PDF002                   | 0,2                             | 2                       | 0,002                   | 0,0004                | 1                                 | 2                                        | 0,0002                             | 2                             | 0,0004                    | 21,43062                                  | 0,0004                                | 1                           | 0,0004              | 42,86124                                  | 3,74                        | 0,0037<br>4                 | 0,16030103<br>8                        | 1                         | 0,16030103<br>8            | 160,3010376 | 267,3796791                                              |
| PDF003                   | 0,2                             | 2                       | 0,002                   | 0,0004                | 1                                 | 2                                        | 0,0002                             | 2                             | 0,0004                    | 21,43062                                  | 0,0004                                | 1                           | 0,0004              | 42,86124                                  | 7,46                        | 0,0074<br>6                 | 0,31974485                             | 1                         | 0,31974485                 | 319,7448504 | 134,0482574                                              |
| PDF004                   | 0,24                            | 2                       | 0,002                   | 0,00048               | 1                                 | 2                                        | 0,00024                            | 2                             | 0,00048                   | 25,716744                                 | 0,00048                               | 4                           | 0,00012             | 12,85837<br>2                             | 6,22                        | 0,0062<br>2                 | 0,07997907<br>4                        | 1                         | 0,07997907<br>4            | 79,97907384 | 160,7717042                                              |
| PDF005                   | 0,2                             | 2                       | 0,002                   | 0,0004                | 1                                 | 2                                        | 0,0002                             | 2                             | 0,0004                    | 21,43062                                  | 0,0004                                | 2                           | 0,0002              | 21,43062                                  | 7,46                        | 0,0074<br>6                 | 0,15987242<br>5                        | 1                         | 0,15987242<br>5            | 159,8724252 | 134,0482574                                              |
| PDF006                   | 0,2                             | 2                       | 0,002                   | 0,0004                | 1                                 | 2                                        | 0,0002                             | 2                             | 0,0004                    | 21,43062                                  | 0,0004                                | 4                           | 0,0001              | 10,71531                                  | 6,22                        | 0,0062<br>2                 | 0,06664922<br>8                        | 1                         | 0,06664922<br>8            | 66,6492282  | 160,7717042                                              |
| PDF007                   | 1                               | 2                       | 0,002                   | 0,002                 | 1                                 | 2                                        | 0,001                              | 2                             | 0,002                     | 107,1531                                  | 0,002                                 | 25                          | 0,00008             | 8,572248                                  | 6,22                        | 0,0062<br>2                 | 0,05331938<br>3                        | 1                         | 0,05331938<br>3            | 53,31938256 | 160,7717042                                              |
| PDF008                   | 1                               | 2                       | 0,002                   | 0,002                 | 1                                 | 2                                        | 0,001                              | 2                             | 0,002                     | 107,1531                                  | 0,002                                 | 1                           | 0,002               | 214,3062                                  | 6,22                        | 0,0062<br>2                 | 1,33298456<br>4                        | 1                         | 1,33298456<br>4            | 1332,984564 | 160,7717042                                              |
| PDF009                   | 0,2                             | 2                       | 0,002                   | 0,0004                | 1                                 | 2                                        | 0,0002                             | 2                             | 0,0004                    | 21,43062                                  | 0,0004                                | 1                           | 0,0004              | 42,86124                                  | 10                          | 0,01                        | 0,4286124                              | 1                         | 0,4286124                  | 428,6124    | 100                                                      |
| PDF010                   | 1                               | 2                       | 0,002                   | 0,002                 | 1                                 | 2                                        | 0,001                              | 2                             | 0,002                     | 107,1531                                  | 0,002                                 | 1                           | 0,002               | 214,3062                                  | 10                          | 0,01                        | 2,143062                               | 1                         | 2,143062                   | 2143,062    | 100                                                      |
| PDF011                   | 1                               | 2                       | 0,002                   | 0,002                 | 1                                 | 2                                        | 0,001                              | 2                             | 0,002                     | 107,1531                                  | 0,002                                 | 4                           | 0,0005              | 53,57655                                  | 10                          | 0,01                        | 0,5357655                              | 1                         | 0,5357655                  | 535,7655    | 100                                                      |
| PDF012                   | 0,6                             | 2                       | 0,002                   | 0,0012                | 1                                 | 2                                        | 0,0006                             | 2                             | 0,0012                    | 64,29186                                  | 0,0012                                | 10                          | 0,00012             | 12,85837<br>2                             | 50                          | 0,05                        | 0,6429186                              | 1                         | 0,6429186                  | 642,9186    | 20                                                       |
| PDF013                   | 1                               | 2                       | 0,002                   | 0,002                 | 1                                 | 2                                        | 0,001                              | 2                             | 0,002                     | 107,1531                                  | 0,002                                 | 10                          | 0,0002              | 21,43062                                  | 50                          | 0,05                        | 1,071531                               | 1                         | 1,071531                   | 1071,531    | 20                                                       |
| PDF014                   | 0,6                             | 2                       | 0,002                   | 0,0012                | 1                                 | 2                                        | 0,0006                             | 2                             | 0,0012                    | 64,29186                                  | 0,0012                                | 10                          | 0,00012             | 12,85837<br>2                             | 50                          | 0,05                        | 0,6429186                              | 1                         | 0,6429186                  | 642,9186    | 20                                                       |
| PDF015                   | 0,2                             | 2                       | 0,002                   | 0,0004                | 1                                 | 2                                        | 0,0002                             | 2                             | 0,0004                    | 21,43062                                  | 0,0004                                | 1                           | 0,0004              | 42,86124                                  | 200                         | 0,2                         | 8,572248                               | 1                         | 8,572248                   | 8572,248    | 5                                                        |
| PDF016                   | 0,2                             | 2                       | 0,002                   | 0,0004                | 1                                 | 2                                        | 0,0002                             | 2                             | 0,0004                    | 21,43062                                  | 0,0004                                | 1                           | 0,0004              | 42,86124                                  | 20                          | 0,02                        | 0,8572248                              | 1                         | 0,8572248                  | 857,2248    | 50                                                       |

## A-2 BET results: Isotherm, Particle size distribution and Pore Size vs Pore Volume

### A-2.1 Silica

The duration of the analysis was 244.1 min with a cold zone of 3.04092 mL and a warm zone of 3.82125 mL.

Table A.5: Summary of BET results for silica

| <i>BET Results</i>     |                           |
|------------------------|---------------------------|
| Pore Volume            | 0.0032 cm <sup>3</sup> /g |
| Surface area           | 1.2718 m <sup>2</sup> /g  |
| Lower confidence limit | 0.8440 nm                 |
| Mode (Half pore width) | 1.3236 nm                 |
| Fitting error          | 0.7242 %                  |

Table A.6: Raw data of BET isotherm, particle size distribution, pore size and pore volume for silica

| <i>Isotherm</i>                 |                                           | <i>PSD and Pore Size vs Pore Volume</i> |                                     |                                  | <i>Surface area</i>                            |                                 |
|---------------------------------|-------------------------------------------|-----------------------------------------|-------------------------------------|----------------------------------|------------------------------------------------|---------------------------------|
| <i>Relative pressure [p/po]</i> | <i>Absorbed volume [cm<sup>3</sup>/g]</i> | <i>Half Pore width (nm)</i>             | <i>Pore Volume cm<sup>3</sup>/g</i> | <i>dV(r) cm<sup>3</sup>/nm/g</i> | <i>Cumulative surface area m<sup>2</sup>/g</i> | <i>dS(r) m<sup>2</sup>/nm/g</i> |
| 0.0505298                       | 0.265828                                  | 0.84397                                 | 1.07E-05                            | 0.00E+00                         | 1.21E-02                                       | 0.00E+00                        |
| 0.0829441                       | 0.340377                                  | 0.882816                                | 4.97E-05                            | 2.76E-04                         | 5.40E-02                                       | 3.13E-01                        |
| 0.114767                        | 0.389911                                  | 0.92345                                 | 9.64E-05                            | 9.60E-04                         | 1.02E-01                                       | 1.03E+00                        |
| 0.14132                         | 0.420922                                  | 0.965954                                | 1.28E-04                            | 1.10E-03                         | 1.34E-01                                       | 1.14E+00                        |
| 0.177057                        | 0.46606                                   | 1.01041                                 | 1.35E-04                            | 7.14E-04                         | 1.42E-01                                       | 7.18E-01                        |
| 0.206304                        | 0.487714                                  | 1.05692                                 | 1.44E-04                            | 1.58E-04                         | 1.49E-01                                       | 1.57E-01                        |
| 0.234136                        | 0.517356                                  | 1.10557                                 | 1.84E-04                            | 1.66E-04                         | 1.83E-01                                       | 1.43E-01                        |
| 0.267398                        | 0.545281                                  | 1.15646                                 | 2.62E-04                            | 7.99E-04                         | 2.47E-01                                       | 6.80E-01                        |
| 0.299859                        | 0.559396                                  | 1.20969                                 | 3.69E-04                            | 1.46E-03                         | 3.31E-01                                       | 1.20E+00                        |
| 0.328567                        | 0.575014                                  | 1.26537                                 | 4.92E-04                            | 1.92E-03                         | 4.24E-01                                       | 1.51E+00                        |
| 0.359282                        | 0.605681                                  | 1.32361                                 | 6.05E-04                            | 2.11E-03                         | 5.07E-01                                       | 1.60E+00                        |
| 0.390309                        | 0.641351                                  | 1.38453                                 | 7.07E-04                            | 1.87E-03                         | 5.77E-01                                       | 1.35E+00                        |
| 0.425084                        | 0.665916                                  | 1.44826                                 | 7.82E-04                            | 1.60E-03                         | 6.27E-01                                       | 1.11E+00                        |
| 0.453939                        | 0.720119                                  | 1.51492                                 | 8.35E-04                            | 1.12E-03                         | 6.61E-01                                       | 7.46E-01                        |
| 0.484015                        | 0.761496                                  | 1.58465                                 | 8.90E-04                            | 7.64E-04                         | 6.94E-01                                       | 4.85E-01                        |
| 0.519961                        | 0.80132                                   | 1.65758                                 | 9.55E-04                            | 7.50E-04                         | 7.31E-01                                       | 4.51E-01                        |
| 0.550581                        | 0.840087                                  | 1.73388                                 | 1.01E-03                            | 8.51E-04                         | 7.63E-01                                       | 4.91E-01                        |
| 0.577781                        | 0.889607                                  | 1.81369                                 | 1.04E-03                            | 7.20E-04                         | 7.78E-01                                       | 4.00E-01                        |
| 0.610075                        | 0.9028                                    | 1.89717                                 | 1.05E-03                            | 3.38E-04                         | 7.81E-01                                       | 1.82E-01                        |
| 0.641764                        | 0.952467                                  | 1.98449                                 | 1.05E-03                            | 5.96E-05                         | 7.83E-01                                       | 3.14E-02                        |
| 0.672824                        | 1.01981                                   | 2.07583                                 | 1.07E-03                            | 3.89E-05                         | 7.93E-01                                       | 1.79E-02                        |
| 0.701125                        | 1.06301                                   | 2.17138                                 | 1.12E-03                            | 2.45E-04                         | 8.15E-01                                       | 1.10E-01                        |
| 0.733096                        | 1.13883                                   | 2.27132                                 | 1.17E-03                            | 5.06E-04                         | 8.35E-01                                       | 2.22E-01                        |
| 0.762957                        | 1.18873                                   | 2.37586                                 | 1.21E-03                            | 4.37E-04                         | 8.50E-01                                       | 1.85E-01                        |
| 0.795672                        | 1.28393                                   | 2.48522                                 | 1.26E-03                            | 3.54E-04                         | 8.71E-01                                       | 1.42E-01                        |
| 0.82782                         | 1.37452                                   | 2.59961                                 | 1.35E-03                            | 4.83E-04                         | 9.02E-01                                       | 1.84E-01                        |
| 0.856476                        | 1.50552                                   | 2.71926                                 | 1.42E-03                            | 6.90E-04                         | 9.29E-01                                       | 2.53E-01                        |
| 0.889324                        | 1.66187                                   | 2.84443                                 | 1.48E-03                            | 6.28E-04                         | 9.49E-01                                       | 2.22E-01                        |
| 0.92155                         | 1.9985                                    | 2.97535                                 | 1.53E-03                            | 4.46E-04                         | 9.65E-01                                       | 1.51E-01                        |
| 0.949251                        | 2.6046                                    | 3.1123                                  | 1.57E-03                            | 3.69E-04                         | 9.77E-01                                       | 1.19E-01                        |
| 0.921017                        | 2.18545                                   | 3.25555                                 | 1.60E-03                            | 2.69E-04                         | 9.85E-01                                       | 8.33E-02                        |
| 0.889933                        | 1.86519                                   | 3.4054                                  | 1.63E-03                            | 1.73E-04                         | 9.95E-01                                       | 5.11E-02                        |
| 0.857518                        | 1.69106                                   | 3.56214                                 | 1.71E-03                            | 2.31E-04                         | 1.01E+00                                       | 6.38E-02                        |
| 0.825091                        | 1.53739                                   | 3.7261                                  | 1.80E-03                            | 4.56E-04                         | 1.04E+00                                       | 1.22E-01                        |
| 0.794637                        | 1.45384                                   | 3.8976                                  | 1.88E-03                            | 5.41E-04                         | 1.06E+00                                       | 1.39E-01                        |
| 0.762537                        | 1.34975                                   | 4.077                                   | 1.94E-03                            | 4.31E-04                         | 1.07E+00                                       | 1.06E-01                        |
| 0.73612                         | 1.32053                                   | 4.26465                                 | 2.00E-03                            | 3.19E-04                         | 1.09E+00                                       | 7.51E-02                        |
| 0.702591                        | 1.25458                                   | 4.46095                                 | 2.08E-03                            | 3.11E-04                         | 1.10E+00                                       | 6.96E-02                        |
| 0.673099                        | 1.20031                                   | 4.66628                                 | 2.15E-03                            | 3.73E-04                         | 1.12E+00                                       | 7.99E-02                        |
| 0.639685                        | 1.12522                                   | 4.88105                                 | 2.22E-03                            | 3.48E-04                         | 1.13E+00                                       | 7.15E-02                        |
| 0.610651                        | 1.06568                                   | 5.10572                                 | 2.30E-03                            | 3.25E-04                         | 1.15E+00                                       | 6.37E-02                        |
| 0.57732                         | 1.0683                                    | 5.34072                                 | 2.38E-03                            | 3.37E-04                         | 1.16E+00                                       | 6.32E-02                        |
| 0.547249                        | 1.02284                                   | 5.58655                                 | 2.45E-03                            | 3.18E-04                         | 1.17E+00                                       | 5.71E-02                        |
| 0.512085                        | 1.0032                                    | 5.84368                                 | 2.52E-03                            | 2.80E-04                         | 1.18E+00                                       | 4.81E-02                        |
| 0.48631                         | 0.992688                                  | 6.11265                                 | 2.60E-03                            | 2.63E-04                         | 1.20E+00                                       | 4.31E-02                        |
| 0.450965                        | 0.947806                                  | 6.39401                                 | 2.69E-03                            | 2.65E-04                         | 1.21E+00                                       | 4.13E-02                        |
| 0.425495                        | 0.911467                                  | 6.68831                                 | 2.81E-03                            | 3.20E-04                         | 1.23E+00                                       | 4.76E-02                        |
| 0.39288                         | 0.863595                                  | 6.99616                                 | 2.91E-03                            | 3.87E-04                         | 1.24E+00                                       | 5.54E-02                        |
| 0.360034                        | 0.838652                                  | 7.31818                                 | 3.00E-03                            | 3.16E-04                         | 1.25E+00                                       | 4.34E-02                        |
| 0.328682                        | 0.807535                                  | 7.65502                                 | 3.08E-03                            | 2.50E-04                         | 1.26E+00                                       | 3.28E-02                        |
| 0.299214                        | 0.754101                                  | 8.00736                                 | 3.16E-03                            | 2.28E-04                         | 1.27E+00                                       | 2.85E-02                        |
| 0.264428                        | 0.707491                                  |                                         |                                     |                                  |                                                |                                 |
| 0.236191                        | 0.6496                                    |                                         |                                     |                                  |                                                |                                 |
| 0.204748                        | 0.589272                                  |                                         |                                     |                                  |                                                |                                 |
| 0.177086                        | 0.533694                                  |                                         |                                     |                                  |                                                |                                 |
| 0.146191                        | 0.477191                                  |                                         |                                     |                                  |                                                |                                 |
| 0.11465                         | 0.406827                                  |                                         |                                     |                                  |                                                |                                 |
| 0.0829192                       | 0.326427                                  |                                         |                                     |                                  |                                                |                                 |

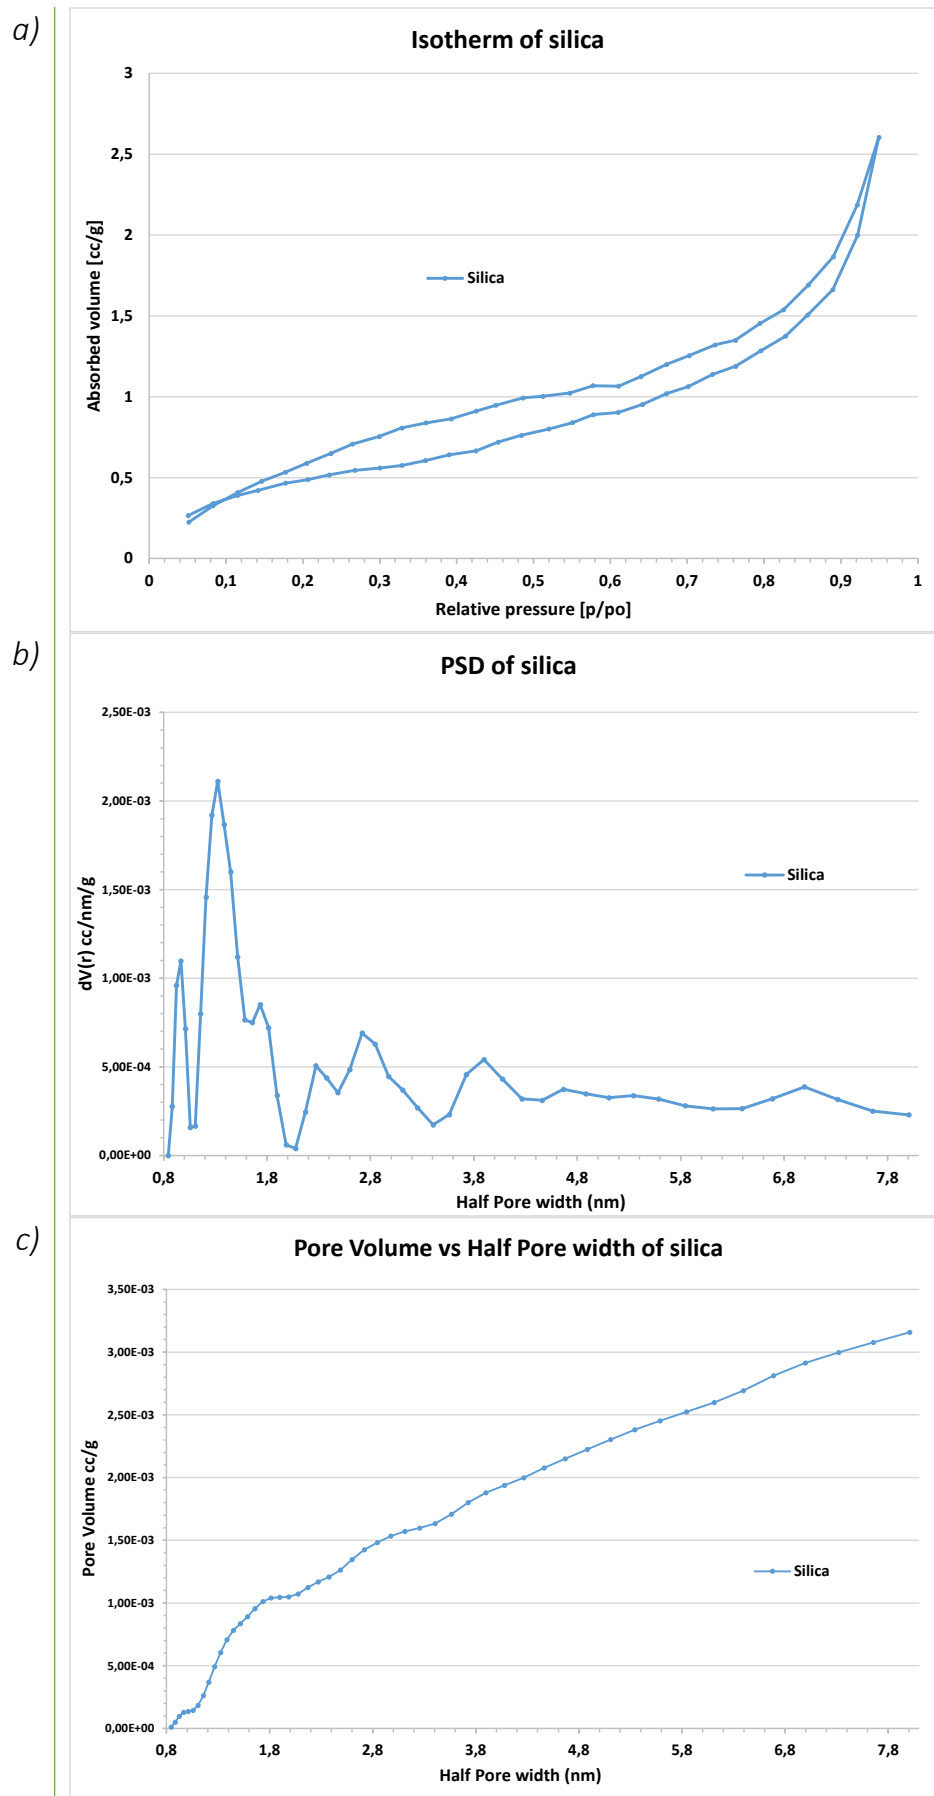

Graph A.2: BET Isotherm (a), Particle size distribution (b) and Pore volume vs Half pore width (c) of Silica

## A-2.2 SSA-3

The duration of the analysis was 253.7 min with a cold zone of 23.6523 mL and a warm zone of 4.25158 mL.

Table A.7: Summary of BET results for SSA-3

| Calculation Results    |                           |
|------------------------|---------------------------|
| Pore Volume            | 0.0079 cm <sup>3</sup> /g |
| Surface area           | 3.0479 m <sup>2</sup> /g  |
| Lower confidence limit | 0.8068 nm                 |
| Mode (Half pore width) | 1.3845 nm                 |
| Fitting error          | 0.77 %                    |

Table A.8: Raw data of BET isotherm, particle size distribution, pore size and pore volume for SSA-3

| Isotherm                 |                                      | PSD and Pore Size vs Pore Volume |                                |                             | Surface area                              |                            |
|--------------------------|--------------------------------------|----------------------------------|--------------------------------|-----------------------------|-------------------------------------------|----------------------------|
| Relative pressure [p/po] | Absorbed volume [cm <sup>3</sup> /g] | Half Pore width (nm)             | Pore Volume cm <sup>3</sup> /g | dV(r) cm <sup>3</sup> /nm/g | Cumulative surface area m <sup>2</sup> /g | dS(r) m <sup>2</sup> /nm/g |
| 0,0479419                | 0,68239                              | 0,806833                         | 1,68E-04                       | 4,54E-04                    | 2,79E-01                                  | 5,62E-01                   |
| 0,080914                 | 0,830332                             | 0,84397                          | 2,42E-04                       | 1,17E-03                    | 3,62E-01                                  | 1,39E+00                   |
| 0,112127                 | 0,93484                              | 0,882816                         | 3,35E-04                       | 1,90E-03                    | 4,63E-01                                  | 2,14E+00                   |
| 0,141422                 | 1,02026                              | 0,92345                          | 4,14E-04                       | 2,29E-03                    | 5,45E-01                                  | 2,48E+00                   |
| 0,173554                 | 1,11626                              | 0,965954                         | 4,61E-04                       | 1,86E-03                    | 5,93E-01                                  | 1,94E+00                   |
| 0,203154                 | 1,18698                              | 1,01041                          | 4,72E-04                       | 1,07E-03                    | 6,04E-01                                  | 1,07E+00                   |
| 0,235357                 | 1,26787                              | 1,05692                          | 4,81E-04                       | 2,32E-04                    | 6,12E-01                                  | 2,29E-01                   |
| 0,267475                 | 1,33522                              | 1,10557                          | 5,28E-04                       | 1,84E-04                    | 6,52E-01                                  | 1,59E-01                   |
| 0,298552                 | 1,40055                              | 1,15646                          | 6,27E-04                       | 9,35E-04                    | 7,33E-01                                  | 7,94E-01                   |
| 0,329366                 | 1,46852                              | 1,20969                          | 7,68E-04                       | 1,86E-03                    | 8,44E-01                                  | 1,52E+00                   |
| 0,360217                 | 1,54714                              | 1,26537                          | 9,35E-04                       | 2,53E-03                    | 9,70E-01                                  | 1,99E+00                   |
| 0,391153                 | 1,62465                              | 1,32361                          | 1,11E-03                       | 2,87E-03                    | 1,10E+00                                  | 2,17E+00                   |
| 0,421298                 | 1,66252                              | 1,38453                          | 1,27E-03                       | 2,89E-03                    | 1,20E+00                                  | 2,09E+00                   |
| 0,453071                 | 1,72448                              | 1,44826                          | 1,39E-03                       | 2,42E-03                    | 1,29E+00                                  | 1,68E+00                   |
| 0,484919                 | 1,78493                              | 1,51492                          | 1,51E-03                       | 1,94E-03                    | 1,36E+00                                  | 1,29E+00                   |
| 0,515649                 | 1,83266                              | 1,58465                          | 1,60E-03                       | 1,60E-03                    | 1,42E+00                                  | 1,01E+00                   |
| 0,54518                  | 1,90132                              | 1,65758                          | 1,66E-03                       | 1,22E-03                    | 1,45E+00                                  | 7,42E-01                   |
| 0,576754                 | 1,96194                              | 1,73388                          | 1,70E-03                       | 8,79E-04                    | 1,47E+00                                  | 5,11E-01                   |
| 0,605919                 | 2,01314                              | 1,81369                          | 1,70E-03                       | 4,26E-04                    | 1,48E+00                                  | 2,40E-01                   |
| 0,639607                 | 2,07641                              | 1,89717                          | 1,71E-03                       | 7,94E-05                    | 1,48E+00                                  | 4,38E-02                   |
| 0,66934                  | 2,20075                              | 1,98449                          | 1,75E-03                       | 7,20E-05                    | 1,50E+00                                  | 3,47E-02                   |
| 0,701637                 | 2,29196                              | 2,07583                          | 1,86E-03                       | 4,52E-04                    | 1,55E+00                                  | 2,13E-01                   |
| 0,731538                 | 2,44943                              | 2,17138                          | 2,02E-03                       | 1,16E-03                    | 1,62E+00                                  | 5,27E-01                   |
| 0,761689                 | 2,59495                              | 2,27132                          | 2,18E-03                       | 1,63E-03                    | 1,69E+00                                  | 7,18E-01                   |
| 0,79415                  | 2,8315                               | 2,37586                          | 2,35E-03                       | 1,46E-03                    | 1,75E+00                                  | 6,18E-01                   |
| 0,824053                 | 3,0738                               | 2,48522                          | 2,55E-03                       | 1,53E-03                    | 1,83E+00                                  | 6,15E-01                   |
| 0,854669                 | 3,49301                              | 2,59961                          | 2,77E-03                       | 1,75E-03                    | 1,91E+00                                  | 6,74E-01                   |
| 0,886066                 | 3,93738                              | 2,71926                          | 2,99E-03                       | 1,86E-03                    | 1,99E+00                                  | 6,83E-01                   |
| 0,916251                 | 4,51379                              | 2,84443                          | 3,20E-03                       | 1,78E-03                    | 2,06E+00                                  | 6,28E-01                   |
| 0,950705                 | 6,06115                              | 2,97535                          | 3,44E-03                       | 1,60E-03                    | 2,14E+00                                  | 5,37E-01                   |
| 0,920868                 | 5,38502                              | 3,1123                           | 3,68E-03                       | 1,75E-03                    | 2,21E+00                                  | 5,61E-01                   |
| 0,892399                 | 4,71807                              | 3,25555                          | 3,89E-03                       | 1,66E-03                    | 2,27E+00                                  | 5,10E-01                   |
| 0,85917                  | 4,36399                              | 3,4054                           | 4,12E-03                       | 1,43E-03                    | 2,34E+00                                  | 4,20E-01                   |
| 0,827803                 | 3,99034                              | 3,56214                          | 4,41E-03                       | 1,45E-03                    | 2,41E+00                                  | 4,07E-01                   |
| 0,797687                 | 3,77406                              | 3,7261                           | 4,72E-03                       | 1,75E-03                    | 2,50E+00                                  | 4,69E-01                   |
| 0,766347                 | 3,43382                              | 3,8976                           | 4,97E-03                       | 1,85E-03                    | 2,56E+00                                  | 4,75E-01                   |
| 0,735772                 | 3,21625                              | 4,077                            | 5,15E-03                       | 1,40E-03                    | 2,60E+00                                  | 3,47E-01                   |
| 0,704075                 | 2,92277                              | 4,26465                          | 5,30E-03                       | 9,13E-04                    | 2,63E+00                                  | 2,15E-01                   |
| 0,674474                 | 2,7367                               | 4,46095                          | 5,48E-03                       | 7,94E-04                    | 2,67E+00                                  | 1,78E-01                   |
| 0,642092                 | 2,56195                              | 4,66628                          | 5,66E-03                       | 8,71E-04                    | 2,71E+00                                  | 1,86E-01                   |
| 0,611402                 | 2,41491                              | 4,88105                          | 5,85E-03                       | 8,52E-04                    | 2,75E+00                                  | 1,75E-01                   |
| 0,577918                 | 2,33055                              | 5,10572                          | 6,04E-03                       | 8,23E-04                    | 2,78E+00                                  | 1,61E-01                   |
| 0,548296                 | 2,1942                               | 5,34072                          | 6,21E-03                       | 8,20E-04                    | 2,81E+00                                  | 1,54E-01                   |
| 0,518709                 | 2,12836                              | 5,58655                          | 6,35E-03                       | 6,89E-04                    | 2,84E+00                                  | 1,24E-01                   |
| 0,485969                 | 2,02651                              | 5,84368                          | 6,49E-03                       | 5,59E-04                    | 2,86E+00                                  | 9,60E-02                   |
| 0,45626                  | 1,97901                              | 6,11265                          | 6,63E-03                       | 5,16E-04                    | 2,88E+00                                  | 8,46E-02                   |
| 0,422667                 | 1,91484                              | 6,39401                          | 6,81E-03                       | 5,04E-04                    | 2,91E+00                                  | 7,89E-02                   |
| 0,391937                 | 1,84736                              | 6,68831                          | 7,05E-03                       | 5,91E-04                    | 2,94E+00                                  | 8,78E-02                   |
| 0,362114                 | 1,80087                              | 6,99616                          | 7,27E-03                       | 7,81E-04                    | 2,97E+00                                  | 1,11E-01                   |
| 0,329766                 | 1,70978                              | 7,31818                          | 7,46E-03                       | 6,96E-04                    | 3,00E+00                                  | 9,56E-02                   |
| 0,298126                 | 1,64807                              | 7,65502                          | 7,65E-03                       | 5,68E-04                    | 3,02E+00                                  | 7,45E-02                   |
| 0,268488                 | 1,54459                              | 8,00736                          | 7,87E-03                       | 5,20E-04                    | 3,05E+00                                  | 6,49E-02                   |
| 0,236678                 | 1,46132                              |                                  |                                |                             |                                           |                            |
| 0,206139                 | 1,35619                              |                                  |                                |                             |                                           |                            |
| 0,177272                 | 1,2567                               |                                  |                                |                             |                                           |                            |
| 0,145998                 | 1,14055                              |                                  |                                |                             |                                           |                            |
| 0,114596                 | 1,00566                              |                                  |                                |                             |                                           |                            |
| 0,0831815                | 0,86584                              |                                  |                                |                             |                                           |                            |
| 0,0518673                | 0,688108                             |                                  |                                |                             |                                           |                            |
| 0,0513587                | 0,224188                             |                                  |                                |                             |                                           |                            |

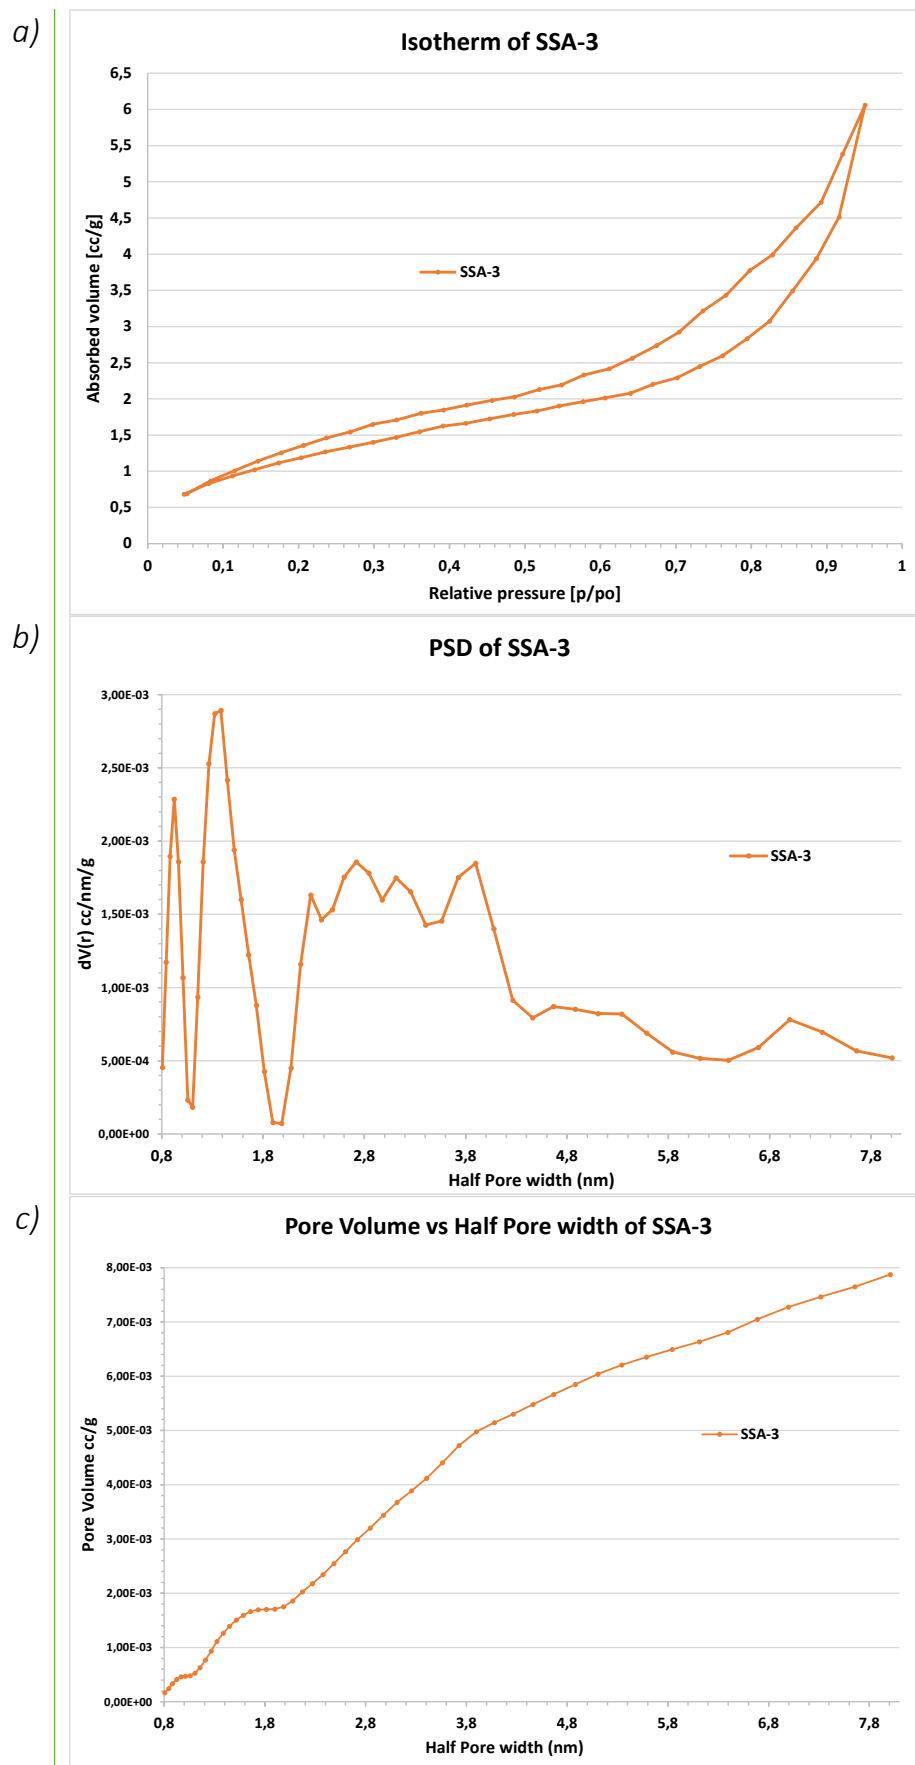

Graph A.3: BET Isotherm (a), Particle size distribution (b) and Pore volume vs Half pore width (c) of SSA-3

## A-2.3 SSA-4

The duration of the analysis was 1027.8 min with a cold zone of 24.3343 mL and a warm zone of 4.16389 mL.

Table A.9: Summary of BET results for SSA-4

| Calculation Results    |                            |
|------------------------|----------------------------|
| Pore Volume            | 0.8493 cm <sup>3</sup> /g  |
| Surface area           | 424.2920 m <sup>2</sup> /g |
| Lower confidence limit | 0.8068 nm                  |
| Mode (Half pore width) | 2.2713 nm                  |
| Fitting error          | 1.47 %                     |

Table A.10: Raw data of BET isotherm, particle size distribution, pore size and pore volume for SSA-4

| Isotherm                 |                                      | PSD and Pore Size vs Pore Volume |                                |                             | Surface area                              |                            |
|--------------------------|--------------------------------------|----------------------------------|--------------------------------|-----------------------------|-------------------------------------------|----------------------------|
| Relative pressure [p/po] | Absorbed volume [cm <sup>3</sup> /g] | Half Pore width (nm)             | Pore Volume cm <sup>3</sup> /g | dV(r) cm <sup>3</sup> /nm/g | Cumulative surface area m <sup>2</sup> /g | dS(r) m <sup>2</sup> /nm/g |
| 0,0476536                | 109,063                              | 0,806833                         | 3,22E-02                       | 0,00E+00                    | 7,43E+01                                  | 0,00E+00                   |
| 0,0793329                | 120,434                              | 0,84397                          | 3,22E-02                       | 0,00E+00                    | 7,43E+01                                  | 0,00E+00                   |
| 0,108218                 | 128,595                              | 0,882816                         | 3,22E-02                       | 0,00E+00                    | 7,43E+01                                  | 0,00E+00                   |
| 0,139705                 | 136,412                              | 0,92345                          | 3,22E-02                       | 0,00E+00                    | 7,43E+01                                  | 0,00E+00                   |
| 0,171085                 | 143,56                               | 0,965954                         | 3,22E-02                       | 0,00E+00                    | 7,43E+01                                  | 0,00E+00                   |
| 0,201967                 | 150,392                              | 1,01041                          | 3,22E-02                       | 0,00E+00                    | 7,43E+01                                  | 0,00E+00                   |
| 0,232241                 | 157,085                              | 1,05692                          | 3,22E-02                       | 0,00E+00                    | 7,43E+01                                  | 0,00E+00                   |
| 0,263298                 | 164,19                               | 1,10557                          | 3,22E-02                       | 0,00E+00                    | 7,43E+01                                  | 0,00E+00                   |
| 0,296264                 | 172,951                              | 1,15646                          | 3,22E-02                       | 0,00E+00                    | 7,43E+01                                  | 0,00E+00                   |
| 0,326676                 | 180,885                              | 1,20969                          | 3,22E-02                       | 0,00E+00                    | 7,43E+01                                  | 0,00E+00                   |
| 0,35649                  | 189,954                              | 1,26537                          | 3,22E-02                       | 0,00E+00                    | 7,43E+01                                  | 0,00E+00                   |
| 0,387949                 | 200,897                              | 1,32361                          | 3,24E-02                       | 0,00E+00                    | 7,45E+01                                  | 0,00E+00                   |
| 0,419358                 | 213,453                              | 1,38453                          | 3,50E-02                       | 3,49E-03                    | 7,62E+01                                  | 2,41E+00                   |
| 0,450836                 | 229,268                              | 1,44826                          | 4,45E-02                       | 4,19E-02                    | 8,24E+01                                  | 2,80E+01                   |
| 0,482723                 | 245,577                              | 1,51492                          | 5,98E-02                       | 1,42E-01                    | 9,20E+01                                  | 9,25E+01                   |
| 0,512113                 | 262,453                              | 1,58465                          | 7,93E-02                       | 2,19E-01                    | 1,04E+02                                  | 1,37E+02                   |
| 0,545172                 | 283,702                              | 1,65758                          | 1,02E-01                       | 2,67E-01                    | 1,17E+02                                  | 1,61E+02                   |
| 0,57383                  | 305,838                              | 1,73388                          | 1,26E-01                       | 2,92E-01                    | 1,30E+02                                  | 1,69E+02                   |
| 0,60425                  | 332,477                              | 1,81369                          | 1,50E-01                       | 3,06E-01                    | 1,43E+02                                  | 1,69E+02                   |
| 0,634693                 | 358,771                              | 1,89717                          | 1,80E-01                       | 2,84E-01                    | 1,58E+02                                  | 1,50E+02                   |
| 0,666794                 | 394,233                              | 1,98449                          | 2,33E-01                       | 3,44E-01                    | 1,83E+02                                  | 1,72E+02                   |
| 0,698005                 | 429,228                              | 2,07583                          | 3,07E-01                       | 5,88E-01                    | 2,17E+02                                  | 2,81E+02                   |
| 0,728979                 | 466,9                                | 2,17138                          | 3,95E-01                       | 7,74E-01                    | 2,56E+02                                  | 3,55E+02                   |
| 0,760094                 | 504,412                              | 2,27132                          | 4,86E-01                       | 8,78E-01                    | 2,94E+02                                  | 3,86E+02                   |
| 0,791892                 | 539,858                              | 2,37586                          | 5,66E-01                       | 8,65E-01                    | 3,26E+02                                  | 3,65E+02                   |
| 0,82266                  | 558,44                               | 2,48522                          | 6,33E-01                       | 7,32E-01                    | 3,52E+02                                  | 2,96E+02                   |
| 0,852227                 | 569,834                              | 2,59961                          | 6,86E-01                       | 5,92E-01                    | 3,72E+02                                  | 2,29E+02                   |
| 0,88729                  | 573,75                               | 2,71926                          | 7,26E-01                       | 4,44E-01                    | 3,86E+02                                  | 1,64E+02                   |
| 0,916062                 | 575,059                              | 2,84443                          | 7,55E-01                       | 3,18E-01                    | 3,96E+02                                  | 1,13E+02                   |
| 0,946027                 | 576,251                              | 2,97535                          | 7,81E-01                       | 2,19E-01                    | 4,04E+02                                  | 7,41E+01                   |
| 0,922496                 | 575,444                              | 3,1123                           | 8,04E-01                       | 1,88E-01                    | 4,11E+02                                  | 6,06E+01                   |
| 0,892332                 | 574,204                              | 3,25555                          | 8,22E-01                       | 1,62E-01                    | 4,17E+02                                  | 5,00E+01                   |
| 0,857804                 | 572,762                              | 3,4054                           | 8,36E-01                       | 1,23E-01                    | 4,21E+02                                  | 3,62E+01                   |
| 0,824748                 | 571,318                              | 3,56214                          | 8,44E-01                       | 8,72E-02                    | 4,23E+02                                  | 2,47E+01                   |
| 0,795625                 | 569,525                              | 3,7261                           | 8,47E-01                       | 4,86E-02                    | 4,24E+02                                  | 1,32E+01                   |
| 0,766176                 | 565,97                               | 3,8976                           | 8,49E-01                       | 1,99E-02                    | 4,24E+02                                  | 5,20E+00                   |
| 0,735781                 | 552,306                              | 4,077                            | 8,49E-01                       | 7,29E-03                    | 4,24E+02                                  | 1,82E+00                   |
| 0,705069                 | 529,173                              | 4,26465                          | 8,50E-01                       | 2,84E-03                    | 4,24E+02                                  | 6,76E-01                   |
| 0,675495                 | 506,674                              | 4,46095                          | 8,50E-01                       | 1,54E-03                    | 4,24E+02                                  | 3,50E-01                   |
| 0,644332                 | 474,876                              | 4,66628                          | 8,50E-01                       | 3,82E-04                    | 4,24E+02                                  | 8,56E-02                   |
| 0,613194                 | 427,794                              | 4,88105                          | 8,50E-01                       | 6,43E-05                    | 4,24E+02                                  | 1,26E-02                   |
| 0,581612                 | 376,599                              | 5,10572                          | 8,50E-01                       | 1,88E-04                    | 4,24E+02                                  | 3,68E-02                   |
| 0,550175                 | 330,041                              | 5,34072                          | 8,50E-01                       | 6,26E-05                    | 4,24E+02                                  | 1,23E-02                   |
| 0,518856                 | 291,907                              | 5,58655                          | 8,50E-01                       | 0,00E+00                    | 4,24E+02                                  | 0,00E+00                   |
| 0,488192                 | 263,17                               | 5,84368                          | 8,50E-01                       | 0,00E+00                    | 4,24E+02                                  | 0,00E+00                   |
| 0,457771                 | 240,737                              | 6,11265                          | 8,50E-01                       | 0,00E+00                    | 4,24E+02                                  | 0,00E+00                   |
| 0,427031                 | 221,296                              | 6,39401                          | 8,50E-01                       | 0,00E+00                    | 4,24E+02                                  | 0,00E+00                   |
| 0,39501                  | 206,17                               | 6,68831                          | 8,50E-01                       | 0,00E+00                    | 4,24E+02                                  | 0,00E+00                   |
| 0,365188                 | 194,985                              | 6,99616                          | 8,50E-01                       | 0,00E+00                    | 4,24E+02                                  | 0,00E+00                   |
| 0,333304                 | 184,755                              | 7,31818                          | 8,50E-01                       | 0,00E+00                    | 4,24E+02                                  | 0,00E+00                   |
| 0,301045                 | 175,67                               | 7,65502                          | 8,50E-01                       | 0,00E+00                    | 4,24E+02                                  | 0,00E+00                   |
| 0,269181                 | 167,497                              | 8,00736                          | 8,50E-01                       | 0,00E+00                    | 4,24E+02                                  | 0,00E+00                   |
| 0,238802                 | 160,126                              |                                  |                                |                             |                                           |                            |
| 0,208395                 | 152,976                              |                                  |                                |                             |                                           |                            |
| 0,176692                 | 145,659                              |                                  |                                |                             |                                           |                            |
| 0,147734                 | 138,862                              |                                  |                                |                             |                                           |                            |
| 0,115301                 | 130,787                              |                                  |                                |                             |                                           |                            |
| 0,0842931                | 122,072                              |                                  |                                |                             |                                           |                            |
| 0,0540856                | 111,645                              |                                  |                                |                             |                                           |                            |

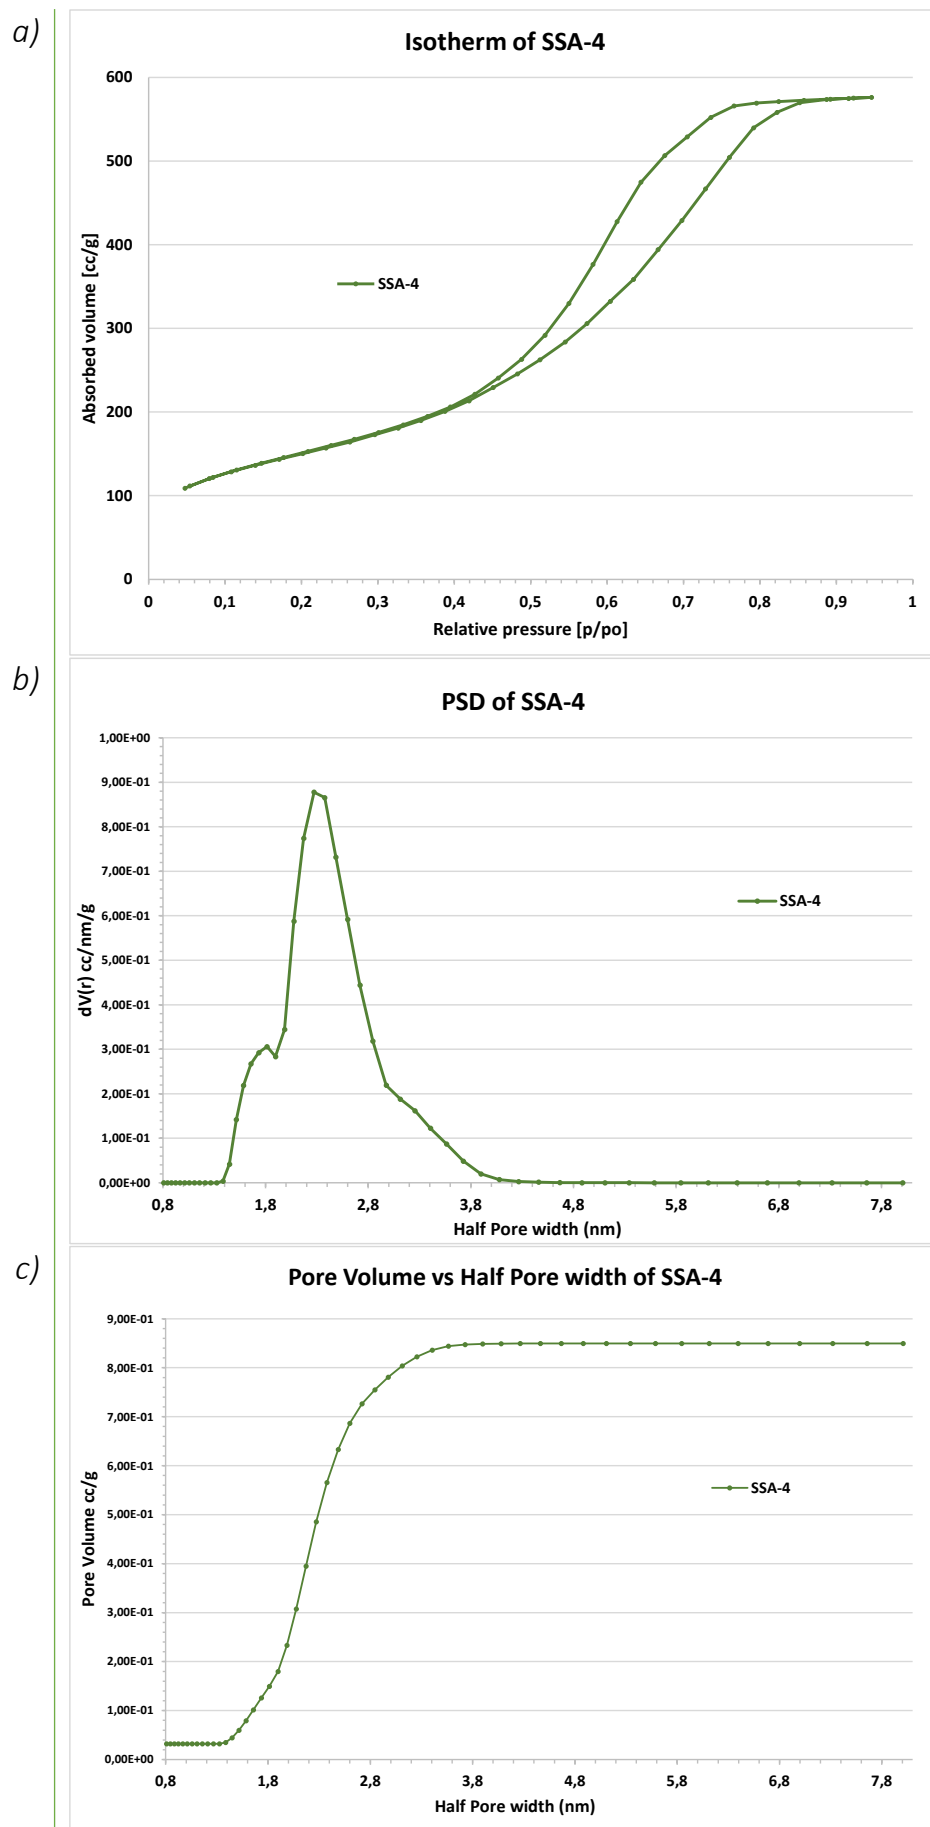

Graph A.4: BET Isotherm (a), Particle size distribution (b) and Pore volume vs Half pore width (c) of **SSA-4**

## A-2.4 SSA-5

The duration of the analysis was 859.6 min with a cold zone of 23.8374 mL and a warm zone of 4.31597 mL.

Table A.11: Summary of BET results of SSA-5

| Calculation Results    |                            |
|------------------------|----------------------------|
| Pore Volume            | 0.7920 cm <sup>3</sup> /g  |
| Surface area           | 412.7466 m <sup>2</sup> /g |
| Lower confidence limit | 0.7713 nm                  |
| Mode (Half pore width) | 2.2713 nm                  |
| Fitting error          | 1.47 %                     |

Table A.12: Raw data of BET isotherm, particle size distribution, pore size and pore volume for SSA-5

| Isotherm                 |                                      | PSD and Pore Size vs Pore Volume |                                |                             | Surface area                              |                            |
|--------------------------|--------------------------------------|----------------------------------|--------------------------------|-----------------------------|-------------------------------------------|----------------------------|
| Relative pressure [p/po] | Absorbed volume [cm <sup>3</sup> /g] | Half Pore width (nm)             | Pore Volume cm <sup>3</sup> /g | dV(r) cm <sup>3</sup> /nm/g | Cumulative surface area m <sup>2</sup> /g | dS(r) m <sup>2</sup> /nm/g |
| 0,0458154                | 105,466                              | 0,77133                          | 3,68E-02                       | 4,43E-02                    | 8,18E+01                                  | 5,74E+01                   |
| 0,0788931                | 117,139                              | 0,806833                         | 3,68E-02                       | 0,00E+00                    | 8,18E+01                                  | 0,00E+00                   |
| 0,107978                 | 125,261                              | 0,84397                          | 3,68E-02                       | 0,00E+00                    | 8,18E+01                                  | 0,00E+00                   |
| 0,13969                  | 133,119                              | 0,882816                         | 3,68E-02                       | 0,00E+00                    | 8,18E+01                                  | 0,00E+00                   |
| 0,169566                 | 140,055                              | 0,92345                          | 3,68E-02                       | 0,00E+00                    | 8,18E+01                                  | 0,00E+00                   |
| 0,204572                 | 148,136                              | 0,965954                         | 3,68E-02                       | 0,00E+00                    | 8,18E+01                                  | 0,00E+00                   |
| 0,231494                 | 154,512                              | 1,01041                          | 3,68E-02                       | 0,00E+00                    | 8,18E+01                                  | 0,00E+00                   |
| 0,264162                 | 162,603                              | 1,05692                          | 3,68E-02                       | 0,00E+00                    | 8,18E+01                                  | 0,00E+00                   |
| 0,296376                 | 171,202                              | 1,10557                          | 3,68E-02                       | 0,00E+00                    | 8,18E+01                                  | 0,00E+00                   |
| 0,32723                  | 180,178                              | 1,15646                          | 3,68E-02                       | 0,00E+00                    | 8,18E+01                                  | 0,00E+00                   |
| 0,357725                 | 190,003                              | 1,20969                          | 3,68E-02                       | 0,00E+00                    | 8,18E+01                                  | 0,00E+00                   |
| 0,388762                 | 200,665                              | 1,26537                          | 3,68E-02                       | 0,00E+00                    | 8,18E+01                                  | 0,00E+00                   |
| 0,418576                 | 212,23                               | 1,32361                          | 3,84E-02                       | 0,00E+00                    | 8,30E+01                                  | 0,00E+00                   |
| 0,449397                 | 225,266                              | 1,38453                          | 4,63E-02                       | 2,76E-02                    | 8,84E+01                                  | 1,91E+01                   |
| 0,481441                 | 240,702                              | 1,44826                          | 5,95E-02                       | 1,23E-01                    | 9,70E+01                                  | 8,40E+01                   |
| 0,511954                 | 256,534                              | 1,51492                          | 7,64E-02                       | 1,98E-01                    | 1,08E+02                                  | 1,30E+02                   |
| 0,541954                 | 274,435                              | 1,58465                          | 9,63E-02                       | 2,42E-01                    | 1,20E+02                                  | 1,52E+02                   |
| 0,575169                 | 296,709                              | 1,65758                          | 1,18E-01                       | 2,73E-01                    | 1,32E+02                                  | 1,65E+02                   |
| 0,604652                 | 319,909                              | 1,73388                          | 1,42E-01                       | 2,86E-01                    | 1,45E+02                                  | 1,65E+02                   |
| 0,63549                  | 346,813                              | 1,81369                          | 1,66E-01                       | 2,97E-01                    | 1,58E+02                                  | 1,64E+02                   |
| 0,668328                 | 378,094                              | 1,89717                          | 1,96E-01                       | 2,87E-01                    | 1,73E+02                                  | 1,51E+02                   |
| 0,697655                 | 408,309                              | 1,98449                          | 2,49E-01                       | 3,52E-01                    | 1,98E+02                                  | 1,76E+02                   |
| 0,72786                  | 444,55                               | 2,07583                          | 3,20E-01                       | 5,74E-01                    | 2,31E+02                                  | 2,75E+02                   |
| 0,760293                 | 476,394                              | 2,17138                          | 4,03E-01                       | 7,39E-01                    | 2,67E+02                                  | 3,39E+02                   |
| 0,790942                 | 504,717                              | 2,27132                          | 4,87E-01                       | 8,30E-01                    | 3,03E+02                                  | 3,65E+02                   |
| 0,823182                 | 523,242                              | 2,37586                          | 5,59E-01                       | 8,07E-01                    | 3,32E+02                                  | 3,40E+02                   |
| 0,855809                 | 533,03                               | 2,48522                          | 6,17E-01                       | 6,61E-01                    | 3,55E+02                                  | 2,67E+02                   |
| 0,888979                 | 535,761                              | 2,59961                          | 6,61E-01                       | 5,10E-01                    | 3,71E+02                                  | 1,97E+02                   |
| 0,915128                 | 537,028                              | 2,71926                          | 6,93E-01                       | 3,63E-01                    | 3,82E+02                                  | 1,34E+02                   |
| 0,946618                 | 538,638                              | 2,84443                          | 7,16E-01                       | 2,55E-01                    | 3,90E+02                                  | 9,04E+01                   |
| 0,921606                 | 537,563                              | 2,97535                          | 7,38E-01                       | 1,80E-01                    | 3,97E+02                                  | 6,09E+01                   |
| 0,891219                 | 536,244                              | 3,1123                           | 7,57E-01                       | 1,56E-01                    | 4,03E+02                                  | 5,02E+01                   |
| 0,85921                  | 534,773                              | 3,25555                          | 7,71E-01                       | 1,32E-01                    | 4,07E+02                                  | 4,09E+01                   |
| 0,827126                 | 533,29                               | 3,4054                           | 7,81E-01                       | 9,59E-02                    | 4,10E+02                                  | 2,84E+01                   |
| 0,79896                  | 531,943                              | 3,56214                          | 7,87E-01                       | 6,42E-02                    | 4,11E+02                                  | 1,82E+01                   |
| 0,766607                 | 528,766                              | 3,7261                           | 7,90E-01                       | 3,57E-02                    | 4,12E+02                                  | 9,72E+00                   |
| 0,736048                 | 518,625                              | 3,8976                           | 7,91E-01                       | 1,51E-02                    | 4,12E+02                                  | 3,95E+00                   |
| 0,704535                 | 499,007                              | 4,077                            | 7,91E-01                       | 6,14E-03                    | 4,13E+02                                  | 1,53E+00                   |
| 0,673928                 | 479,251                              | 4,26465                          | 7,91E-01                       | 1,86E-03                    | 4,13E+02                                  | 4,48E-01                   |
| 0,643524                 | 454,646                              | 4,46095                          | 7,91E-01                       | 7,12E-04                    | 4,13E+02                                  | 1,60E-01                   |
| 0,613263                 | 414,578                              | 4,66628                          | 7,91E-01                       | 4,16E-04                    | 4,13E+02                                  | 9,06E-02                   |
| 0,582335                 | 367,866                              | 4,88105                          | 7,92E-01                       | 2,97E-04                    | 4,13E+02                                  | 5,97E-02                   |
| 0,551                    | 323,671                              | 5,10572                          | 7,92E-01                       | 7,77E-04                    | 4,13E+02                                  | 1,51E-01                   |
| 0,51948                  | 287,561                              | 5,34072                          | 7,92E-01                       | 7,13E-04                    | 4,13E+02                                  | 1,35E-01                   |
| 0,48838                  | 259,213                              | 5,58655                          | 7,92E-01                       | 3,83E-04                    | 4,13E+02                                  | 6,92E-02                   |
| 0,457518                 | 236,954                              | 5,84368                          | 7,92E-01                       | 4,02E-04                    | 4,13E+02                                  | 6,84E-02                   |
| 0,426915                 | 218,866                              | 6,11265                          | 7,92E-01                       | 4,73E-04                    | 4,13E+02                                  | 7,74E-02                   |
| 0,395108                 | 204,638                              | 6,39401                          | 7,92E-01                       | 4,09E-04                    | 4,13E+02                                  | 6,42E-02                   |
| 0,362332                 | 192,457                              | 6,68831                          | 7,92E-01                       | 3,21E-04                    | 4,13E+02                                  | 4,83E-02                   |
| 0,333068                 | 182,797                              | 6,99616                          | 7,92E-01                       | 1,64E-04                    | 4,13E+02                                  | 2,39E-02                   |
| 0,301647                 | 173,34                               | 7,31818                          | 7,92E-01                       | 3,12E-05                    | 4,13E+02                                  | 4,46E-03                   |
| 0,27079                  | 164,999                              | 7,65502                          | 7,92E-01                       | 0,00E+00                    | 4,13E+02                                  | 0,00E+00                   |
| 0,238196                 | 156,599                              | 8,00736                          | 7,92E-01                       | 0,00E+00                    | 4,13E+02                                  | 0,00E+00                   |
| 0,207124                 | 149,077                              |                                  |                                |                             |                                           |                            |
| 0,176935                 | 141,918                              |                                  |                                |                             |                                           |                            |
| 0,14662                  | 134,752                              |                                  |                                |                             |                                           |                            |
| 0,115039                 | 127,008                              |                                  |                                |                             |                                           |                            |
| 0,0843003                | 118,571                              |                                  |                                |                             |                                           |                            |
| 0,0539059                | 108,4                                |                                  |                                |                             |                                           |                            |

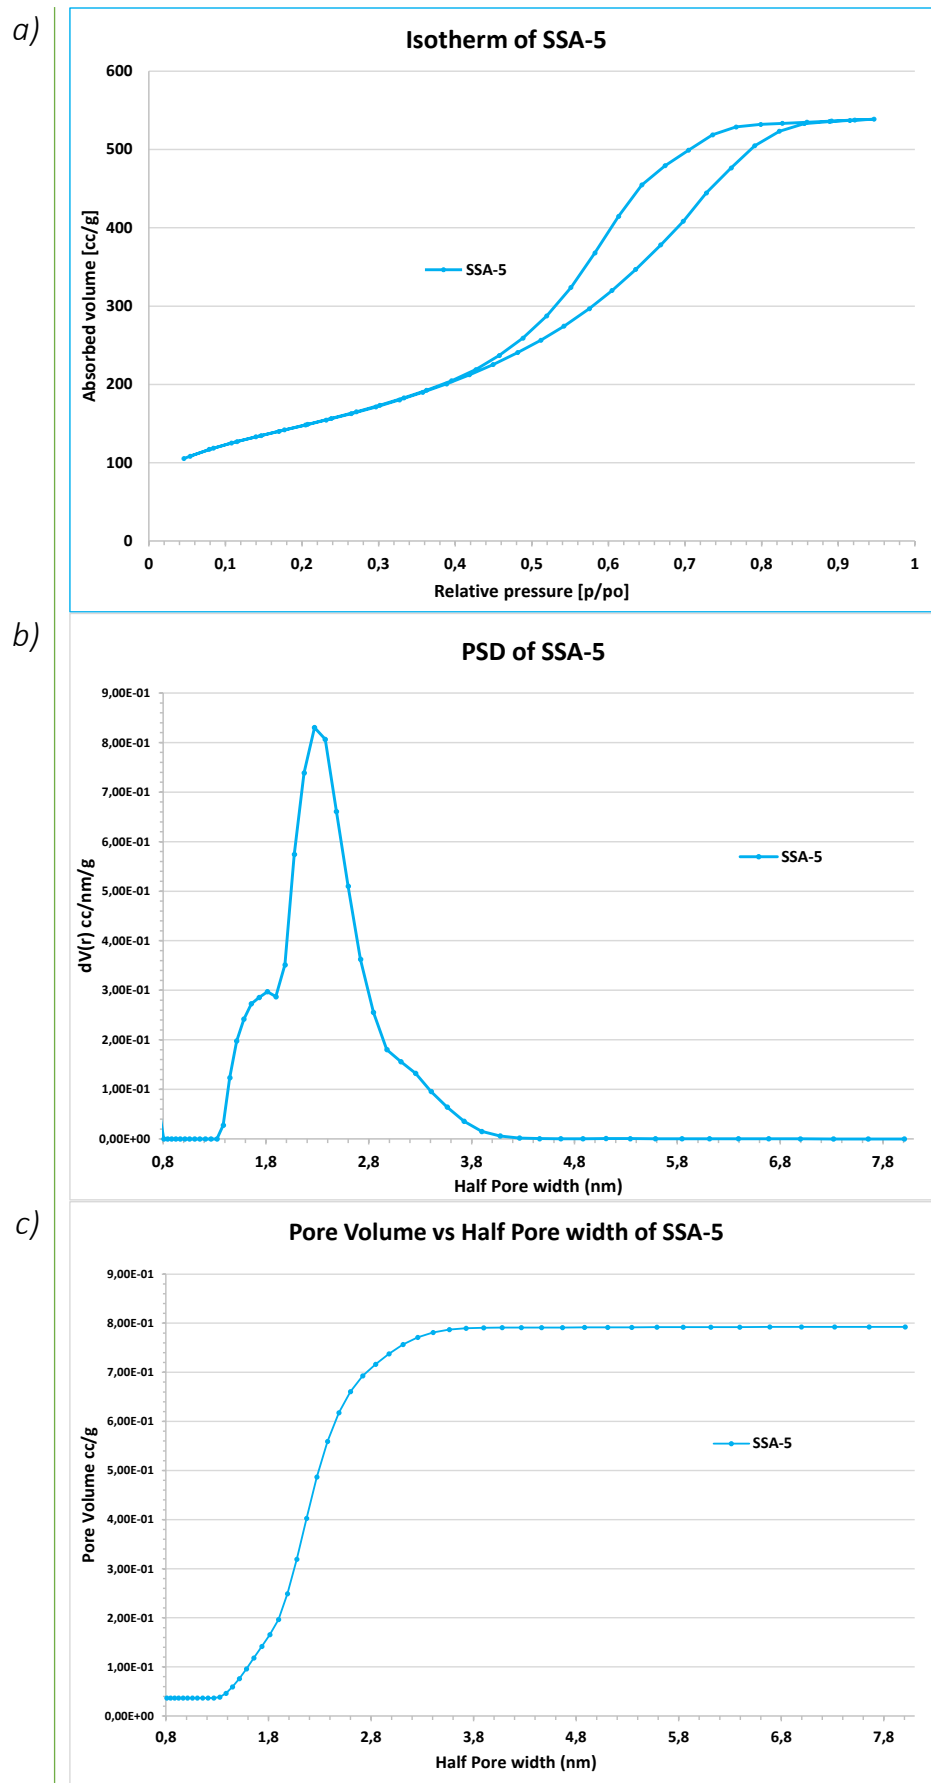

Graph A.5: BET Isotherm (a), Particle size distribution (b) and Pore volume vs Half pore width (c) of **SSA-5**

## A-2.5 SSA-6

The duration of the analysis was 299.7 min with a cold zone of 2.93766 mL and a warm zone of 3.85875 mL.

Table A.13: Summary of BET results for SSA-6

| Calculation Results    |                           |
|------------------------|---------------------------|
| Pore Volume            | 0.0194 cm <sup>3</sup> /g |
| Surface area           | 7.2252 m <sup>2</sup> /g  |
| Lower confidence limit | 0.7713 nm                 |
| Mode (Half pore width) | 3.8976 nm                 |
| Fitting error          | 0.95 %                    |

Table A.14: Raw data of BET isotherm, particle size distribution, pore size and pore volume for SSA-6

| Isotherm                 |                                      | PSD and Pore Size vs Pore Volume |                                |                             | Surface area                              |                            |
|--------------------------|--------------------------------------|----------------------------------|--------------------------------|-----------------------------|-------------------------------------------|----------------------------|
| Relative pressure [p/po] | Absorbed volume [cm <sup>3</sup> /g] | Half Pore width (nm)             | Pore Volume cm <sup>3</sup> /g | dV(r) cm <sup>3</sup> /nm/g | Cumulative surface area m <sup>2</sup> /g | dS(r) m <sup>2</sup> /nm/g |
| 0,0458737                | 1,54993                              | 0,77133                          | 1,07E-03                       | 2,47E-03                    | 2,11E+00                                  | 3,21E+00                   |
| 0,0824556                | 1,79758                              | 0,806833                         | 1,19E-03                       | 2,57E-03                    | 2,24E+00                                  | 3,19E+00                   |
| 0,11441                  | 1,96111                              | 0,84397                          | 1,30E-03                       | 3,08E-03                    | 2,38E+00                                  | 3,64E+00                   |
| 0,145609                 | 2,09355                              | 0,882816                         | 1,40E-03                       | 3,07E-03                    | 2,48E+00                                  | 3,49E+00                   |
| 0,174585                 | 2,21119                              | 0,92345                          | 1,46E-03                       | 2,43E-03                    | 2,54E+00                                  | 2,65E+00                   |
| 0,20378                  | 2,32437                              | 0,965954                         | 1,47E-03                       | 1,22E-03                    | 2,55E+00                                  | 1,29E+00                   |
| 0,234017                 | 2,4385                               | 1,01041                          | 1,47E-03                       | 2,33E-04                    | 2,55E+00                                  | 2,41E-01                   |
| 0,267112                 | 2,55925                              | 1,05692                          | 1,47E-03                       | 0,00E+00                    | 2,55E+00                                  | 0,00E+00                   |
| 0,296987                 | 2,67653                              | 1,10557                          | 1,47E-03                       | 0,00E+00                    | 2,55E+00                                  | 0,00E+00                   |
| 0,326967                 | 2,78875                              | 1,15646                          | 1,48E-03                       | 0,00E+00                    | 2,56E+00                                  | 0,00E+00                   |
| 0,362725                 | 2,92637                              | 1,20969                          | 1,55E-03                       | 2,45E-04                    | 2,61E+00                                  | 1,94E-01                   |
| 0,393196                 | 3,04435                              | 1,26537                          | 1,68E-03                       | 1,21E-03                    | 2,71E+00                                  | 9,42E-01                   |
| 0,423864                 | 3,16542                              | 1,32361                          | 1,86E-03                       | 2,30E-03                    | 2,84E+00                                  | 1,73E+00                   |
| 0,454662                 | 3,29802                              | 1,38453                          | 2,06E-03                       | 2,99E-03                    | 2,98E+00                                  | 2,15E+00                   |
| 0,484739                 | 3,43606                              | 1,44826                          | 2,25E-03                       | 3,10E-03                    | 3,11E+00                                  | 2,15E+00                   |
| 0,513895                 | 3,57365                              | 1,51492                          | 2,44E-03                       | 2,86E-03                    | 3,22E+00                                  | 1,89E+00                   |
| 0,543552                 | 3,74324                              | 1,58465                          | 2,62E-03                       | 2,68E-03                    | 3,33E+00                                  | 1,69E+00                   |
| 0,579275                 | 3,91855                              | 1,65758                          | 2,78E-03                       | 2,50E-03                    | 3,43E+00                                  | 1,51E+00                   |
| 0,611739                 | 4,07027                              | 1,73388                          | 2,93E-03                       | 2,17E-03                    | 3,51E+00                                  | 1,25E+00                   |
| 0,641425                 | 4,28581                              | 1,81369                          | 3,02E-03                       | 1,82E-03                    | 3,56E+00                                  | 1,01E+00                   |
| 0,673641                 | 4,50207                              | 1,89717                          | 3,07E-03                       | 1,08E-03                    | 3,58E+00                                  | 5,78E-01                   |
| 0,69883                  | 4,67833                              | 1,98449                          | 3,19E-03                       | 5,78E-04                    | 3,64E+00                                  | 2,90E-01                   |
| 0,73132                  | 4,98103                              | 2,07583                          | 3,40E-03                       | 1,26E-03                    | 3,74E+00                                  | 5,98E-01                   |
| 0,762659                 | 5,3237                               | 2,17138                          | 3,70E-03                       | 2,23E-03                    | 3,87E+00                                  | 1,02E+00                   |
| 0,792581                 | 5,76145                              | 2,27132                          | 4,02E-03                       | 3,01E-03                    | 4,01E+00                                  | 1,32E+00                   |
| 0,825336                 | 6,34732                              | 2,37586                          | 4,27E-03                       | 3,11E-03                    | 4,10E+00                                  | 1,31E+00                   |
| 0,854935                 | 7,14058                              | 2,48522                          | 4,49E-03                       | 2,24E-03                    | 4,19E+00                                  | 9,07E-01                   |
| 0,886316                 | 8,40371                              | 2,59961                          | 4,76E-03                       | 1,89E-03                    | 4,29E+00                                  | 7,26E-01                   |
| 0,918866                 | 10,6951                              | 2,71926                          | 5,08E-03                       | 2,28E-03                    | 4,40E+00                                  | 8,36E-01                   |
| 0,946976                 | 15,2918                              | 2,84443                          | 5,39E-03                       | 2,55E-03                    | 4,51E+00                                  | 8,97E-01                   |
| 0,920303                 | 13,3031                              | 2,97535                          | 5,70E-03                       | 2,40E-03                    | 4,61E+00                                  | 8,09E-01                   |
| 0,88717                  | 10,8592                              | 3,1123                           | 5,99E-03                       | 2,27E-03                    | 4,69E+00                                  | 7,31E-01                   |
| 0,86182                  | 9,52726                              | 3,25555                          | 6,34E-03                       | 1,98E-03                    | 4,80E+00                                  | 6,08E-01                   |
| 0,829899                 | 8,26797                              | 3,4054                           | 6,82E-03                       | 2,33E-03                    | 4,93E+00                                  | 6,82E-01                   |
| 0,797076                 | 7,35451                              | 3,56214                          | 7,40E-03                       | 3,07E-03                    | 5,09E+00                                  | 8,59E-01                   |
| 0,764875                 | 6,68067                              | 3,7261                           | 8,03E-03                       | 3,55E-03                    | 5,25E+00                                  | 9,51E-01                   |
| 0,735971                 | 6,17541                              | 3,8976                           | 8,64E-03                       | 3,66E-03                    | 5,40E+00                                  | 9,39E-01                   |
| 0,70348                  | 5,7194                               | 4,077                            | 9,24E-03                       | 3,45E-03                    | 5,54E+00                                  | 8,47E-01                   |
| 0,672067                 | 5,37437                              | 4,26465                          | 9,83E-03                       | 3,16E-03                    | 5,67E+00                                  | 7,42E-01                   |
| 0,639552                 | 5,1171                               | 4,46095                          | 1,04E-02                       | 3,01E-03                    | 5,80E+00                                  | 6,74E-01                   |
| 0,607212                 | 4,99357                              | 4,66628                          | 1,10E-02                       | 2,98E-03                    | 5,93E+00                                  | 6,38E-01                   |
| 0,580477                 | 4,73499                              | 4,88105                          | 1,17E-02                       | 2,83E-03                    | 6,05E+00                                  | 5,80E-01                   |
| 0,54998                  | 4,51878                              | 5,10572                          | 1,23E-02                       | 2,74E-03                    | 6,17E+00                                  | 5,37E-01                   |
| 0,515367                 | 4,32604                              | 5,34072                          | 1,30E-02                       | 2,82E-03                    | 6,29E+00                                  | 5,28E-01                   |
| 0,486836                 | 4,14327                              | 5,58655                          | 1,37E-02                       | 2,78E-03                    | 6,41E+00                                  | 4,98E-01                   |
| 0,456802                 | 3,95254                              | 5,84368                          | 1,44E-02                       | 2,70E-03                    | 6,53E+00                                  | 4,63E-01                   |
| 0,425746                 | 3,78157                              | 6,11265                          | 1,52E-02                       | 2,62E-03                    | 6,64E+00                                  | 4,30E-01                   |
| 0,394573                 | 3,65716                              | 6,39401                          | 1,60E-02                       | 2,65E-03                    | 6,77E+00                                  | 4,15E-01                   |
| 0,361179                 | 3,51279                              | 6,68831                          | 1,69E-02                       | 2,96E-03                    | 6,90E+00                                  | 4,43E-01                   |
| 0,332509                 | 3,40189                              | 6,99616                          | 1,77E-02                       | 2,94E-03                    | 7,01E+00                                  | 4,21E-01                   |
| 0,301422                 | 3,27201                              | 7,31818                          | 1,83E-02                       | 2,27E-03                    | 7,08E+00                                  | 3,12E-01                   |
| 0,266619                 | 3,11278                              | 7,65502                          | 1,88E-02                       | 1,80E-03                    | 7,16E+00                                  | 2,36E-01                   |
| 0,237619                 | 3,00019                              | 8,00736                          | 1,94E-02                       | 1,64E-03                    | 7,23E+00                                  | 2,05E-01                   |
| 0,204594                 | 2,8559                               |                                  |                                |                             |                                           |                            |
| 0,174318                 | 2,71846                              |                                  |                                |                             |                                           |                            |
| 0,146391                 | 2,56545                              |                                  |                                |                             |                                           |                            |
| 0,11502                  | 2,37785                              |                                  |                                |                             |                                           |                            |
| 0,0834649                | 2,16773                              |                                  |                                |                             |                                           |                            |
| 0,0519184                | 1,91631                              |                                  |                                |                             |                                           |                            |

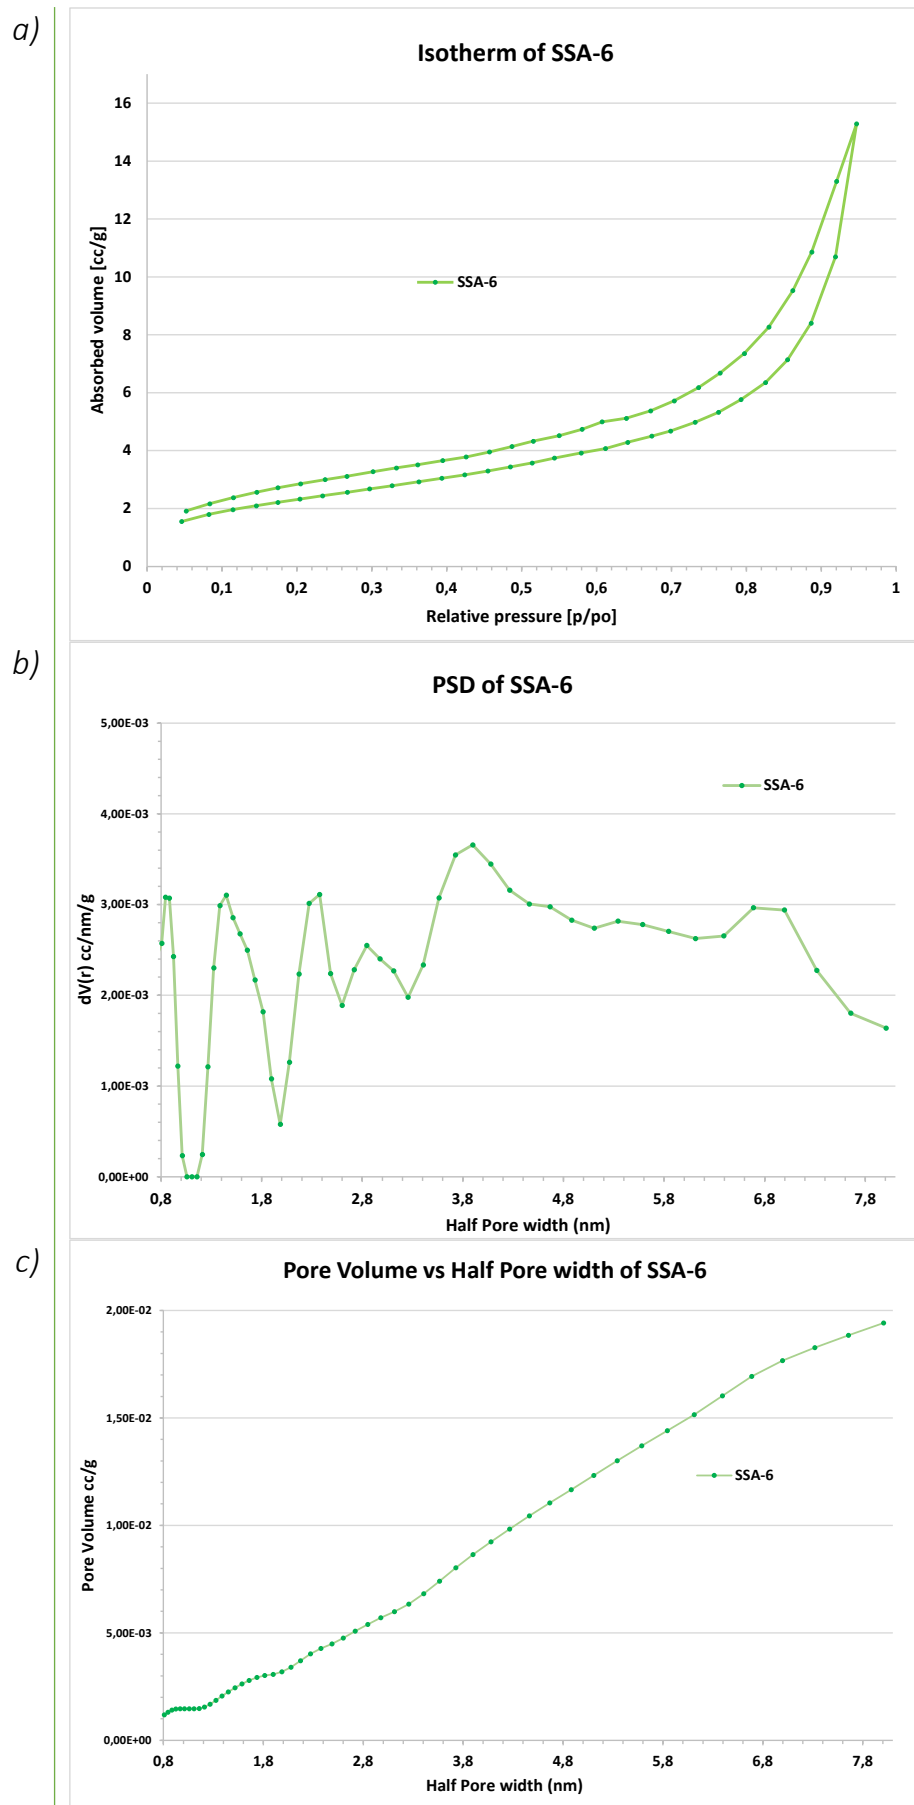

Graph A.6: BET Isotherm (a), Particle size distribution (b) and Pore volume vs Half pore width (c) of SSA-6

## A-2.6 SSA-7

The duration of the analysis was 240.2 min with a cold zone of 24.3789 mL and a warm zone of 4.25787 mL.

Table A.15: Summary of BET results of SSA-7

| Calculation Results    |                           |
|------------------------|---------------------------|
| Pore Volume            | 0.0016 cm <sup>3</sup> /g |
| Surface area           | 1.0381 m <sup>2</sup> /g  |
| Lower confidence limit | 0.8068 nm                 |
| Mode (Half pore width) | 1.2097 nm                 |
| Fitting error          | 0.77 %                    |

Table A.16: Raw data of BET isotherm, particle size distribution, pore size and pore volume for SSA-7

| Isotherm                 |                                      | PSD and Pore Size vs Pore Volume |                                |                             | Surface area                              |                            |
|--------------------------|--------------------------------------|----------------------------------|--------------------------------|-----------------------------|-------------------------------------------|----------------------------|
| Relative pressure [p/po] | Absorbed volume [cm <sup>3</sup> /g] | Half Pore width (nm)             | Pore Volume cm <sup>3</sup> /g | dV(r) cm <sup>3</sup> /nm/g | Cumulative surface area m <sup>2</sup> /g | dS(r) m <sup>2</sup> /nm/g |
| 0.0492318                | 0.185249                             | 0.806833                         | 0.00E+00                       | 0.00E+00                    | 0.00E+00                                  | 0.00E+00                   |
| 0.0808098                | 0.276768                             | 0.84397                          | 6.99E-06                       | 0.00E+00                    | 7.57E-03                                  | 0.00E+00                   |
| 0.112174                 | 0.339523                             | 0.882816                         | 4.09E-05                       | 1.80E-04                    | 4.37E-02                                  | 1.95E-01                   |
| 0.142538                 | 0.393921                             | 0.92345                          | 9.70E-05                       | 8.34E-04                    | 1.02E-01                                  | 8.89E-01                   |
| 0.173968                 | 0.452256                             | 0.965954                         | 1.45E-04                       | 1.32E-03                    | 1.49E-01                                  | 1.36E+00                   |
| 0.203683                 | 0.496598                             | 1.01041                          | 1.62E-04                       | 1.07E-03                    | 1.66E-01                                  | 1.08E+00                   |
| 0.236312                 | 0.543214                             | 1.05692                          | 2.00E-04                       | 3.70E-04                    | 1.99E-01                                  | 3.56E-01                   |
| 0.26445                  | 0.580432                             | 1.10557                          | 2.97E-04                       | 7.75E-04                    | 2.83E-01                                  | 6.83E-01                   |
| 0.298312                 | 0.615403                             | 1.15646                          | 4.10E-04                       | 1.91E-03                    | 3.77E-01                                  | 1.64E+00                   |
| 0.32684                  | 0.605626                             | 1.20969                          | 5.06E-04                       | 2.13E-03                    | 4.52E-01                                  | 1.77E+00                   |
| 0.360082                 | 0.58831                              | 1.26537                          | 6.09E-04                       | 1.71E-03                    | 5.31E-01                                  | 1.36E+00                   |
| 0.391815                 | 0.59058                              | 1.32361                          | 7.26E-04                       | 1.78E-03                    | 6.15E-01                                  | 1.34E+00                   |
| 0.421443                 | 0.608455                             | 1.38453                          | 8.24E-04                       | 1.91E-03                    | 6.83E-01                                  | 1.38E+00                   |
| 0.453122                 | 0.615829                             | 1.44826                          | 9.05E-04                       | 1.54E-03                    | 7.37E-01                                  | 1.07E+00                   |
| 0.483764                 | 0.616309                             | 1.51492                          | 9.83E-04                       | 1.22E-03                    | 7.86E-01                                  | 8.08E-01                   |
| 0.514218                 | 0.614795                             | 1.58465                          | 1.06E-03                       | 1.12E-03                    | 8.34E-01                                  | 7.09E-01                   |
| 0.545765                 | 0.619897                             | 1.65758                          | 1.14E-03                       | 1.09E-03                    | 8.80E-01                                  | 6.59E-01                   |
| 0.574562                 | 0.61919                              | 1.73388                          | 1.21E-03                       | 1.03E-03                    | 9.18E-01                                  | 5.94E-01                   |
| 0.60799                  | 0.623618                             | 1.81369                          | 1.27E-03                       | 8.66E-04                    | 9.49E-01                                  | 4.79E-01                   |
| 0.63931                  | 0.632387                             | 1.89717                          | 1.30E-03                       | 7.15E-04                    | 9.65E-01                                  | 3.79E-01                   |
| 0.671136                 | 0.630379                             | 1.98449                          | 1.31E-03                       | 3.40E-04                    | 9.70E-01                                  | 1.75E-01                   |
| 0.70158                  | 0.657027                             | 2.07583                          | 1.32E-03                       | 1.18E-04                    | 9.76E-01                                  | 5.70E-02                   |
| 0.732566                 | 0.66976                              | 2.17138                          | 1.34E-03                       | 1.49E-04                    | 9.82E-01                                  | 6.84E-02                   |
| 0.763793                 | 0.684054                             | 2.27132                          | 1.35E-03                       | 1.36E-04                    | 9.87E-01                                  | 6.04E-02                   |
| 0.792705                 | 0.70611                              | 2.37586                          | 1.36E-03                       | 1.08E-04                    | 9.91E-01                                  | 4.58E-02                   |
| 0.824197                 | 0.757736                             | 2.48522                          | 1.36E-03                       | 7.58E-05                    | 9.93E-01                                  | 3.07E-02                   |
| 0.856534                 | 0.800852                             | 2.59961                          | 1.37E-03                       | 5.81E-05                    | 9.96E-01                                  | 2.24E-02                   |
| 0.888253                 | 0.897431                             | 2.71926                          | 1.38E-03                       | 5.30E-05                    | 9.98E-01                                  | 1.95E-02                   |
| 0.915842                 | 1.02179                              | 2.84443                          | 1.38E-03                       | 4.66E-05                    | 9.99E-01                                  | 1.65E-02                   |
| 0.947933                 | 1.36488                              | 2.97535                          | 1.39E-03                       | 3.54E-05                    | 1.00E+00                                  | 1.20E-02                   |
| 0.91994                  | 1.14897                              | 3.1123                           | 1.39E-03                       | 2.78E-05                    | 1.00E+00                                  | 8.98E-03                   |
| 0.890786                 | 1.02153                              | 3.25555                          | 1.39E-03                       | 1.73E-05                    | 1.00E+00                                  | 5.36E-03                   |
| 0.859782                 | 0.940966                             | 3.4054                           | 1.39E-03                       | 1.79E-05                    | 1.00E+00                                  | 5.24E-03                   |
| 0.828973                 | 0.912619                             | 3.56214                          | 1.40E-03                       | 2.41E-05                    | 1.00E+00                                  | 6.75E-03                   |
| 0.797666                 | 0.873942                             | 3.7261                           | 1.40E-03                       | 2.68E-05                    | 1.01E+00                                  | 7.19E-03                   |
| 0.765916                 | 0.860467                             | 3.8976                           | 1.41E-03                       | 2.62E-05                    | 1.01E+00                                  | 6.74E-03                   |
| 0.734319                 | 0.885329                             | 4.077                            | 1.41E-03                       | 2.18E-05                    | 1.01E+00                                  | 5.38E-03                   |
| 0.701462                 | 0.907805                             | 4.26465                          | 1.41E-03                       | 1.75E-05                    | 1.01E+00                                  | 4.12E-03                   |
| 0.670944                 | 0.896701                             | 4.46095                          | 1.42E-03                       | 1.57E-05                    | 1.01E+00                                  | 3.52E-03                   |
| 0.639188                 | 0.926158                             | 4.66628                          | 1.42E-03                       | 1.36E-05                    | 1.01E+00                                  | 2.92E-03                   |
| 0.610625                 | 0.95595                              | 4.88105                          | 1.42E-03                       | 1.03E-05                    | 1.01E+00                                  | 2.12E-03                   |
| 0.57863                  | 0.908149                             | 5.10572                          | 1.42E-03                       | 8.05E-06                    | 1.01E+00                                  | 1.58E-03                   |
| 0.546874                 | 0.936371                             | 5.34072                          | 1.42E-03                       | 4.98E-06                    | 1.01E+00                                  | 9.46E-04                   |
| 0.517368                 | 0.92197                              | 5.58655                          | 1.42E-03                       | 2.06E-06                    | 1.01E+00                                  | 3.70E-04                   |
| 0.485257                 | 0.921174                             | 5.84368                          | 1.42E-03                       | 3.66E-06                    | 1.01E+00                                  | 6.18E-04                   |
| 0.456108                 | 0.880133                             | 6.11265                          | 1.43E-03                       | 5.39E-06                    | 1.01E+00                                  | 8.79E-04                   |
| 0.423239                 | 0.84388                              | 6.39401                          | 1.45E-03                       | 1.32E-05                    | 1.01E+00                                  | 2.02E-03                   |
| 0.391654                 | 0.796117                             | 6.68831                          | 1.49E-03                       | 6.27E-05                    | 1.02E+00                                  | 9.14E-03                   |
| 0.361632                 | 0.765956                             | 6.99616                          | 1.53E-03                       | 1.41E-04                    | 1.03E+00                                  | 2.00E-02                   |
| 0.329696                 | 0.718458                             | 7.31818                          | 1.57E-03                       | 1.32E-04                    | 1.03E+00                                  | 1.81E-02                   |
| 0.299671                 | 0.687989                             | 7.65502                          | 1.60E-03                       | 1.06E-04                    | 1.03E+00                                  | 1.39E-02                   |
| 0.267322                 | 0.629072                             | 8.00736                          | 1.64E-03                       | 9.69E-05                    | 1.04E+00                                  | 1.21E-02                   |
| 0.237017                 | 0.581979                             |                                  |                                |                             |                                           |                            |
| 0.208117                 | 0.552334                             |                                  |                                |                             |                                           |                            |
| 0.176512                 | 0.471604                             |                                  |                                |                             |                                           |                            |
| 0.145796                 | 0.407784                             |                                  |                                |                             |                                           |                            |
| 0.114468                 | 0.337844                             |                                  |                                |                             |                                           |                            |
| 0.0830192                | 0.262134                             |                                  |                                |                             |                                           |                            |
| 0.051671                 | 0.145195                             |                                  |                                |                             |                                           |                            |

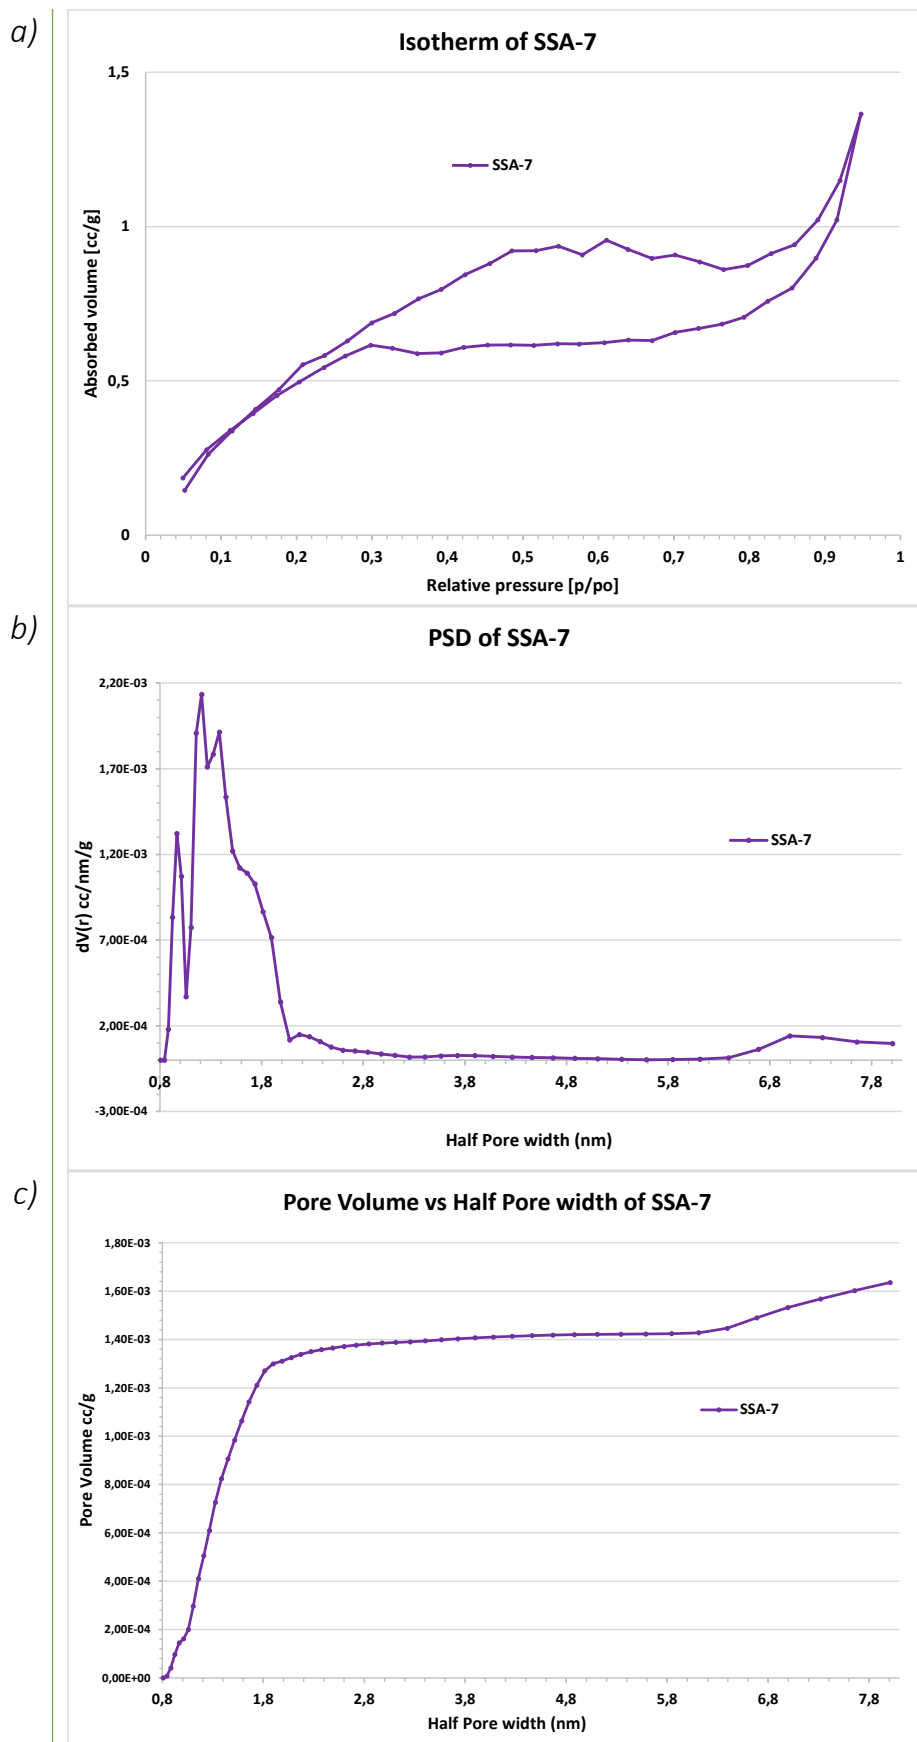

Graph A.7: BET Isotherm (a), Particle size distribution (b) and Pore volume vs Half pore width (c) of SSA-7

## A-2.7 Combinations

a)

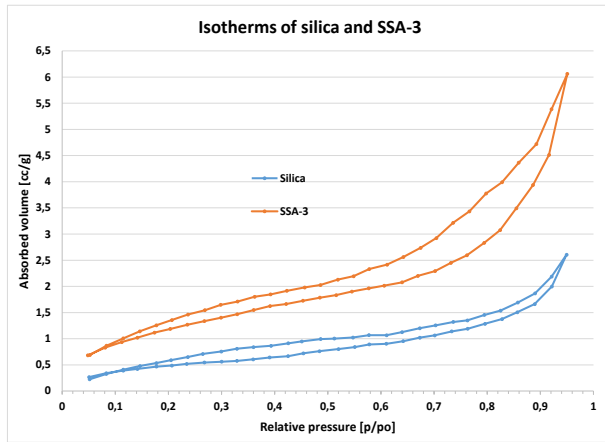

b)

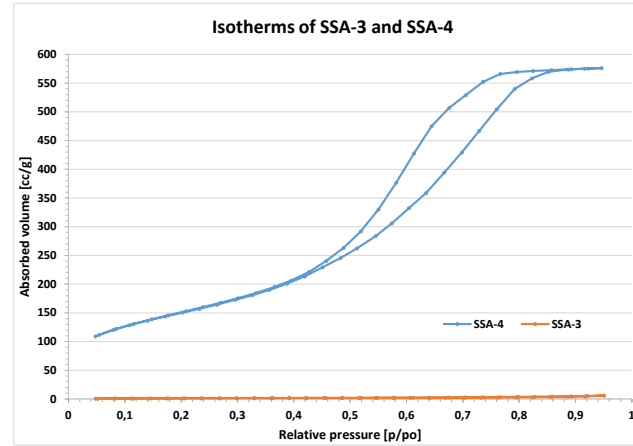

c)

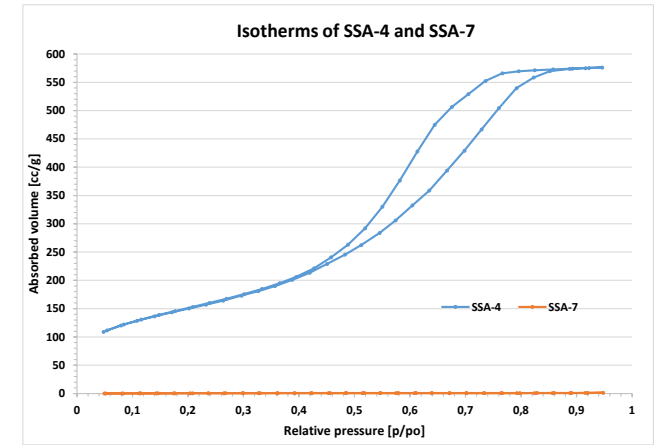

d)

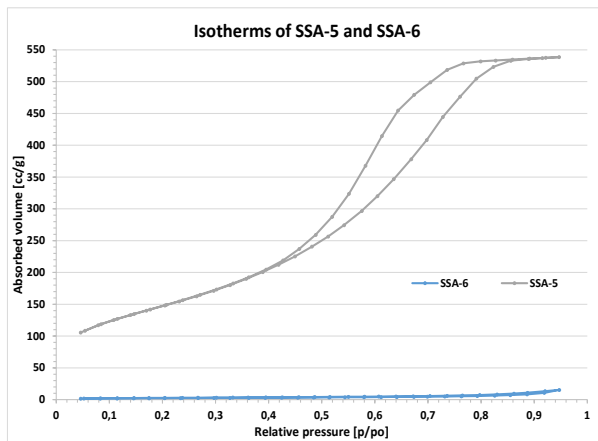

e)

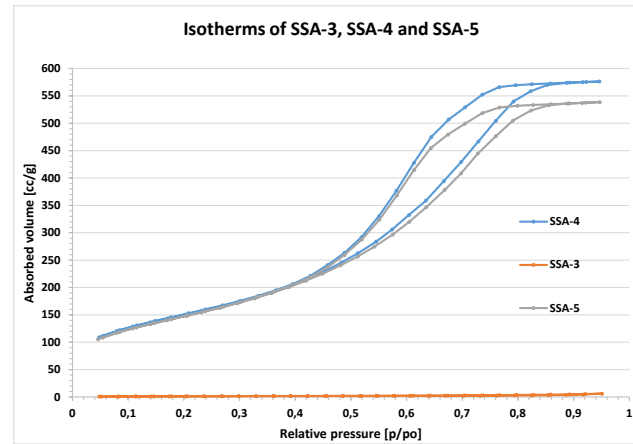

f)

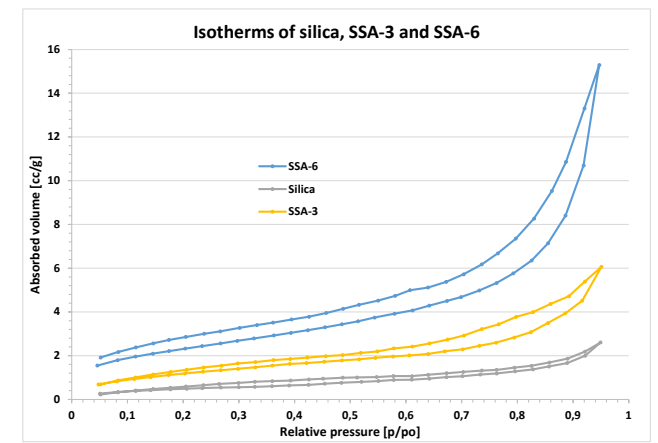

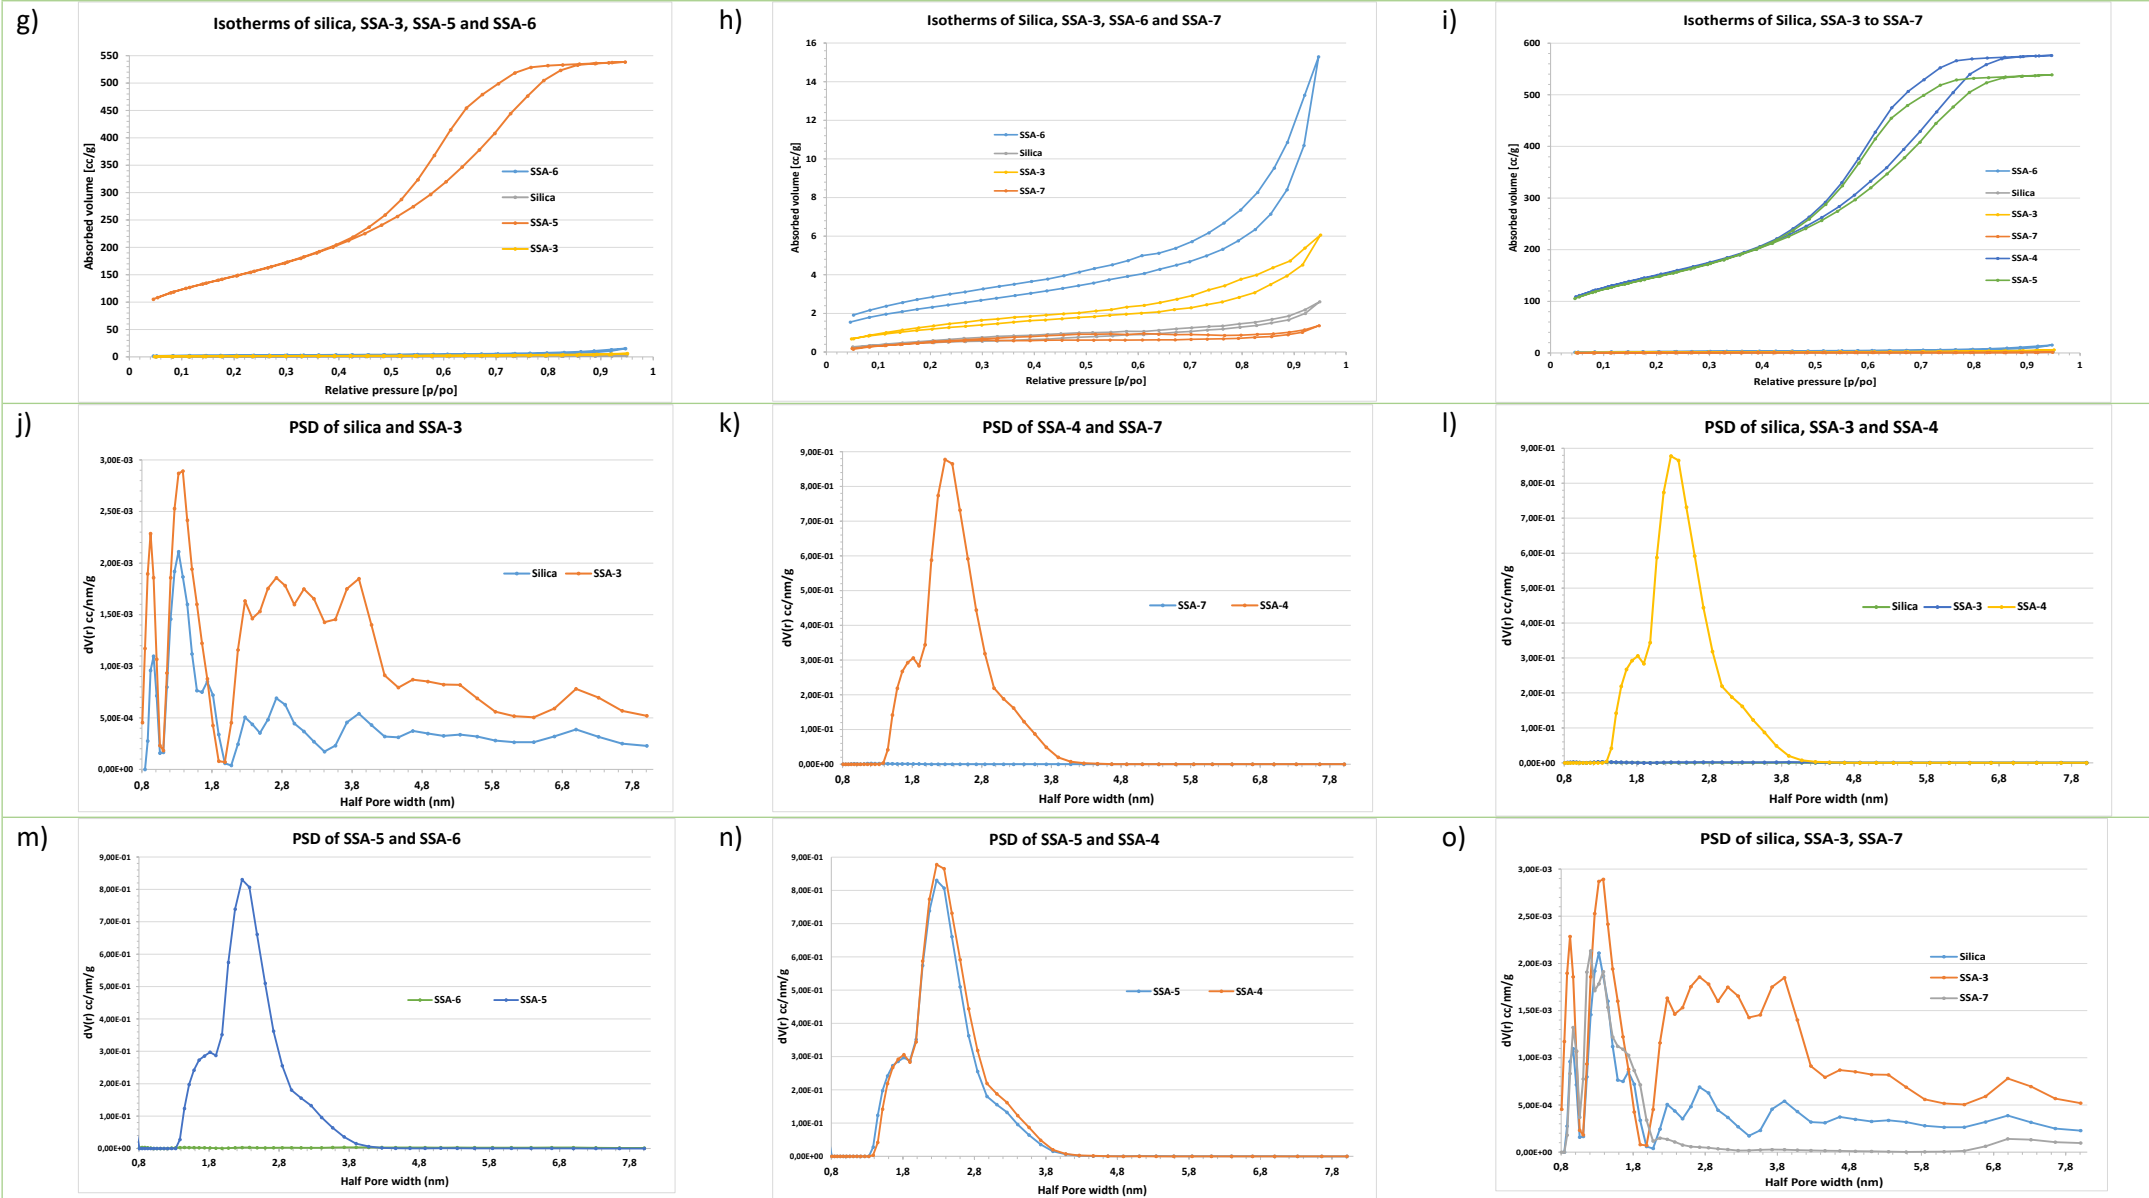

p)

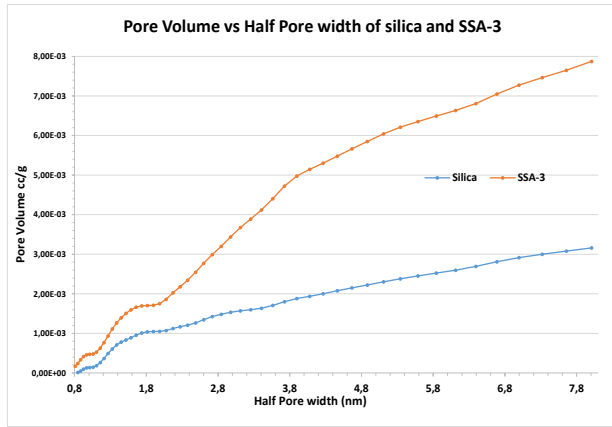

q)

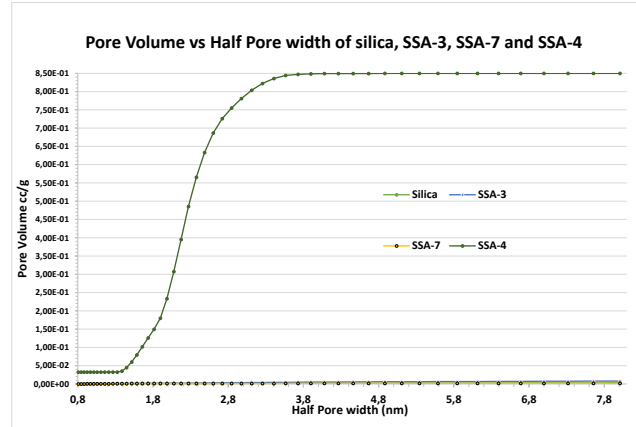

r)

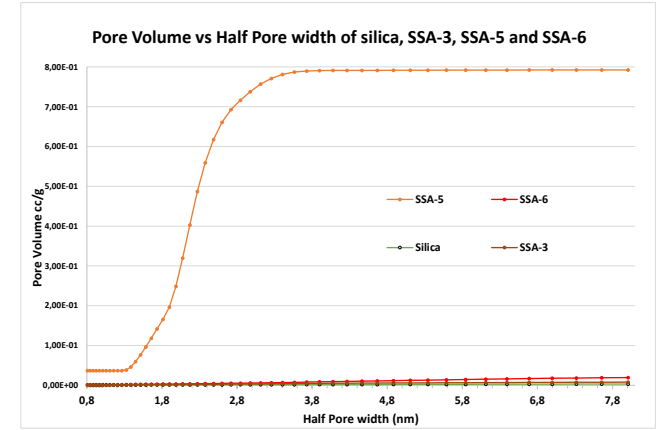

s)

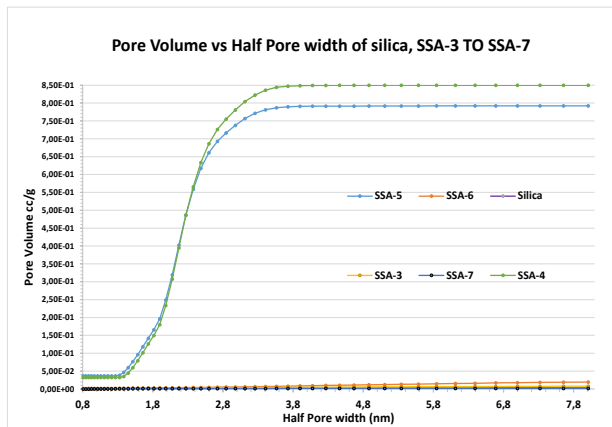

t)

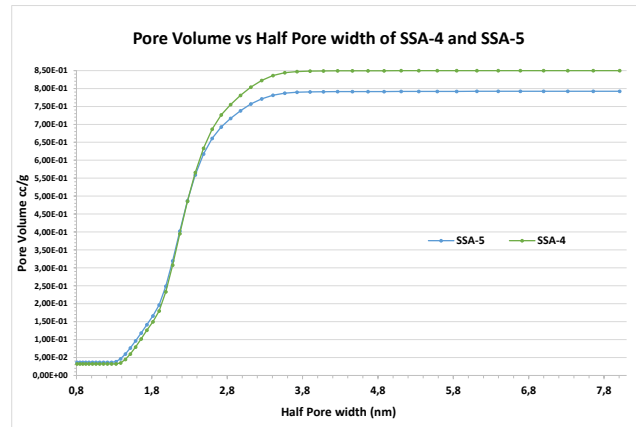

u)

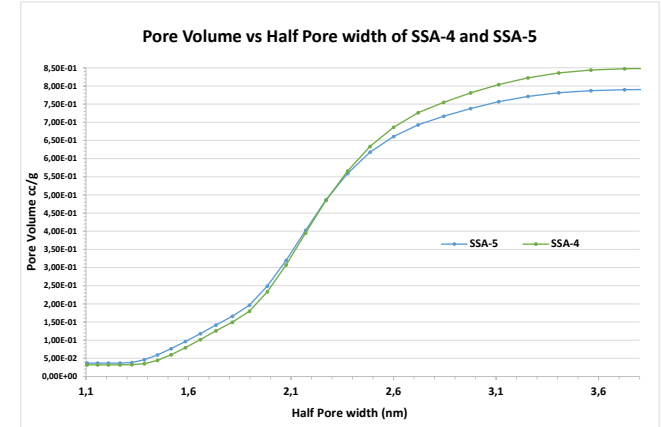

## A-3 TGA and DSC results

## A-3.1 Silica

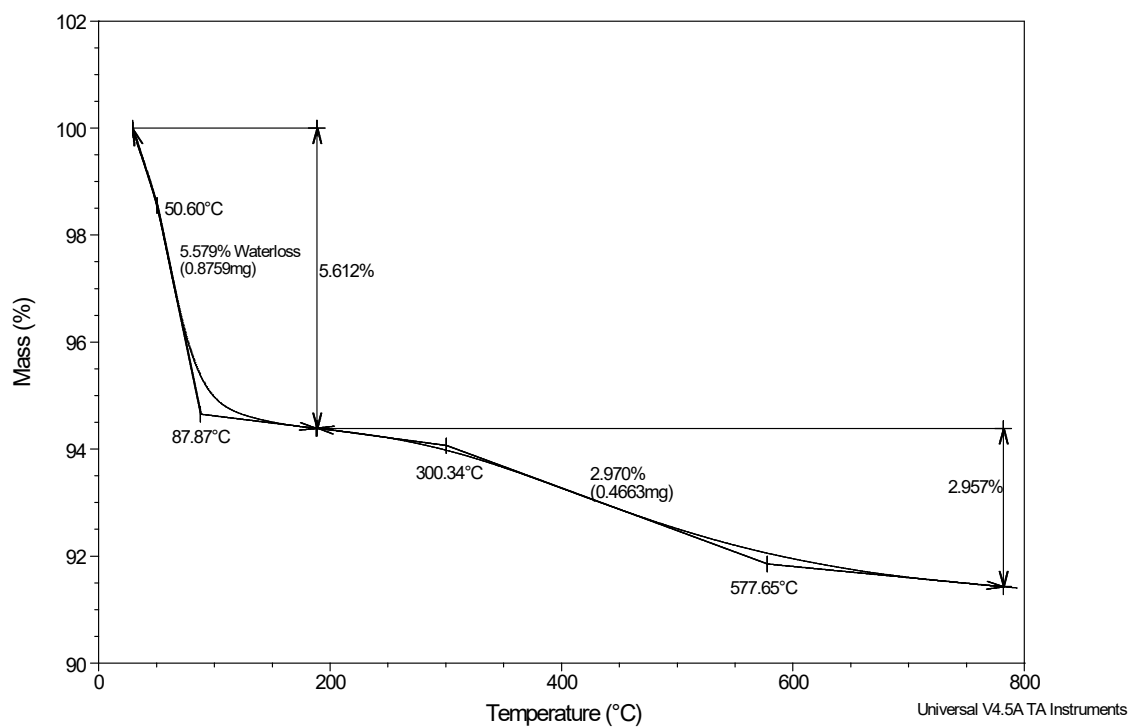

Graph A.8: TGA graph of silica

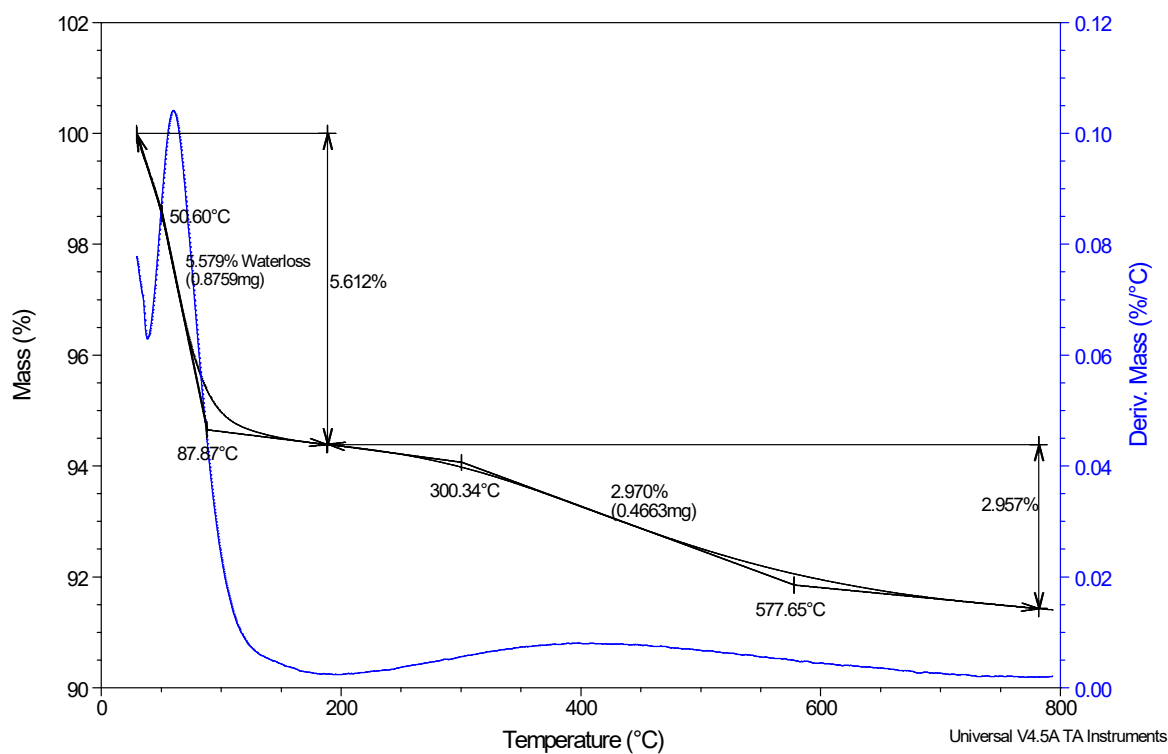

Graph A.9: TGA (black) and DTA (blue) of silica

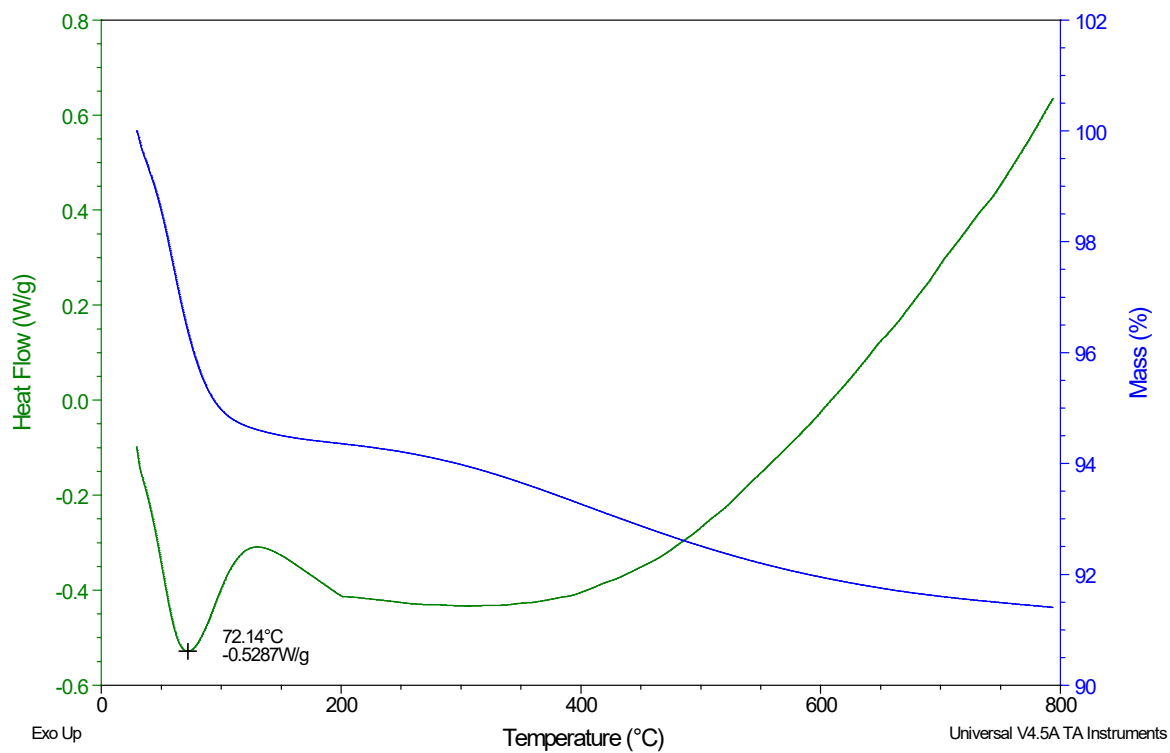

Graph A.10: DSC (green) and TGA (blue) graphs of silica

### A-3.2 SSA-3

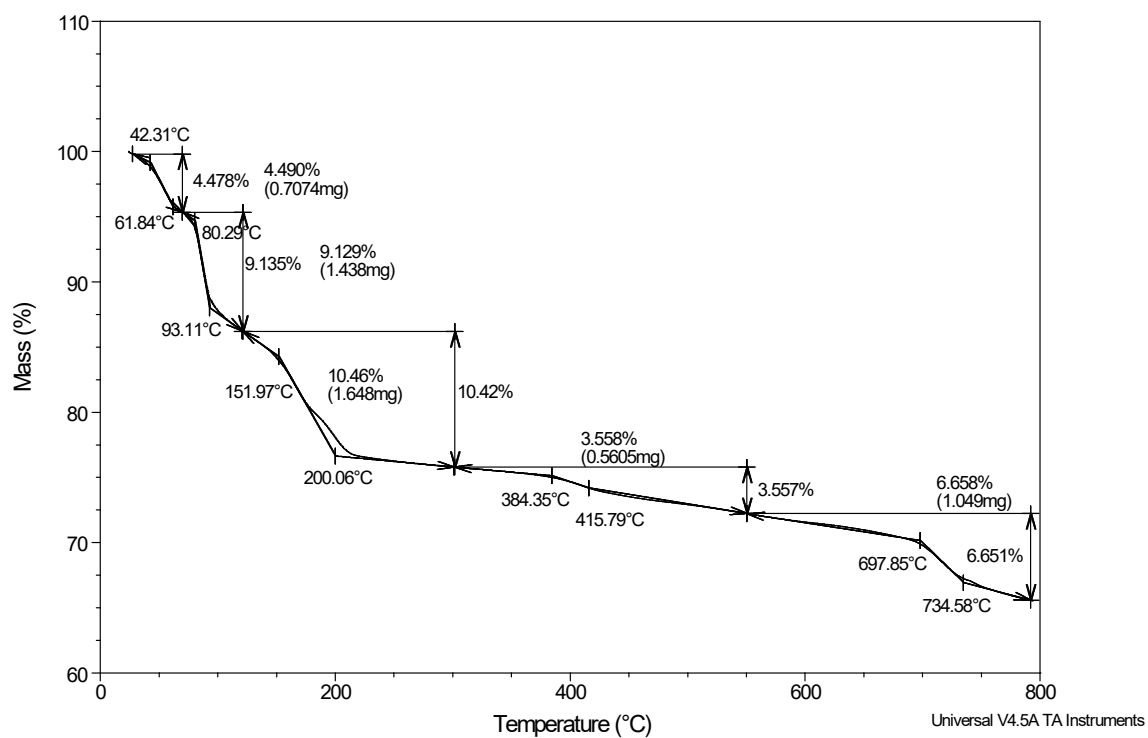

Graph A.11: TGA graph of oxidized silica SSA-3

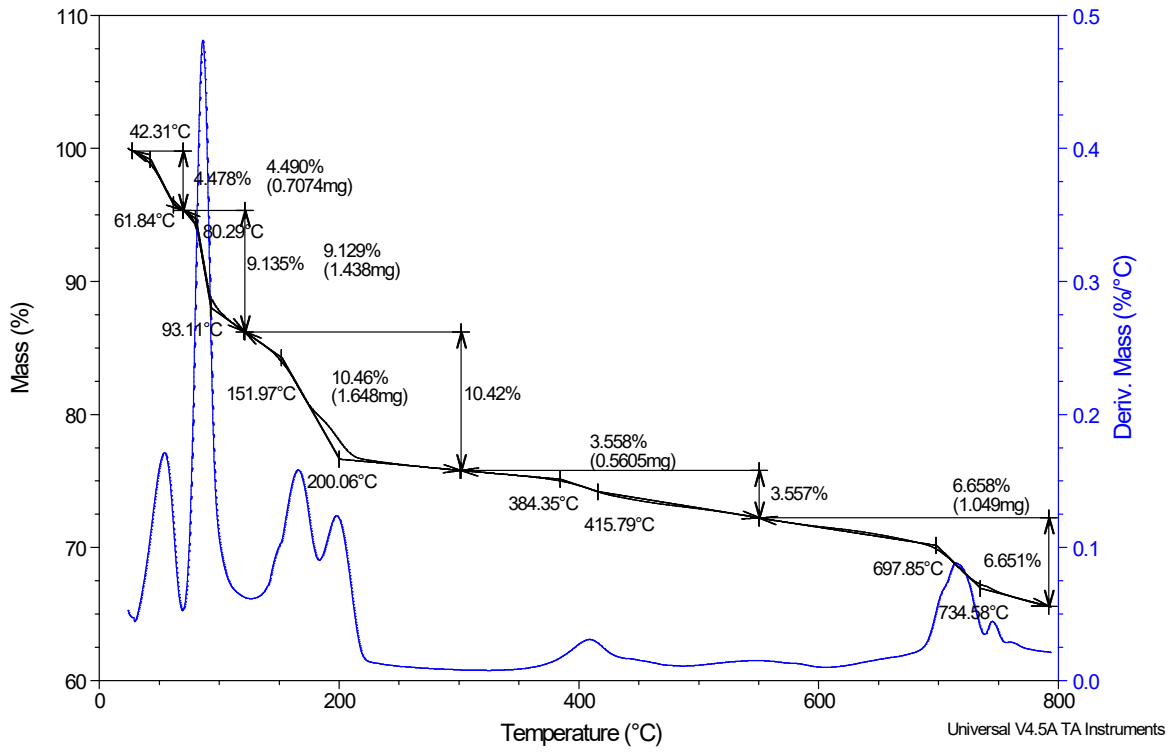

Graph A.12: TGA (black) and DTG (blue) of SSA-3

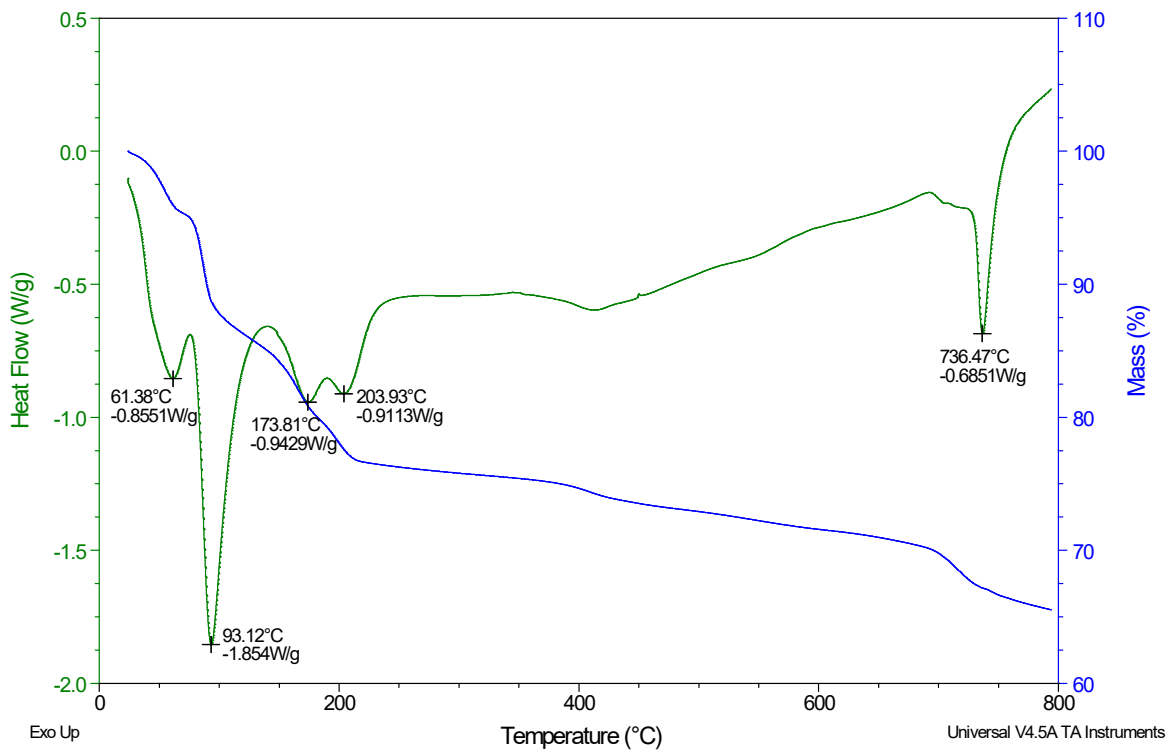

Graph A.13: DSC (green) and TGA (blue) of oxidized silica SSA-3

## A-3.3 SSA-4

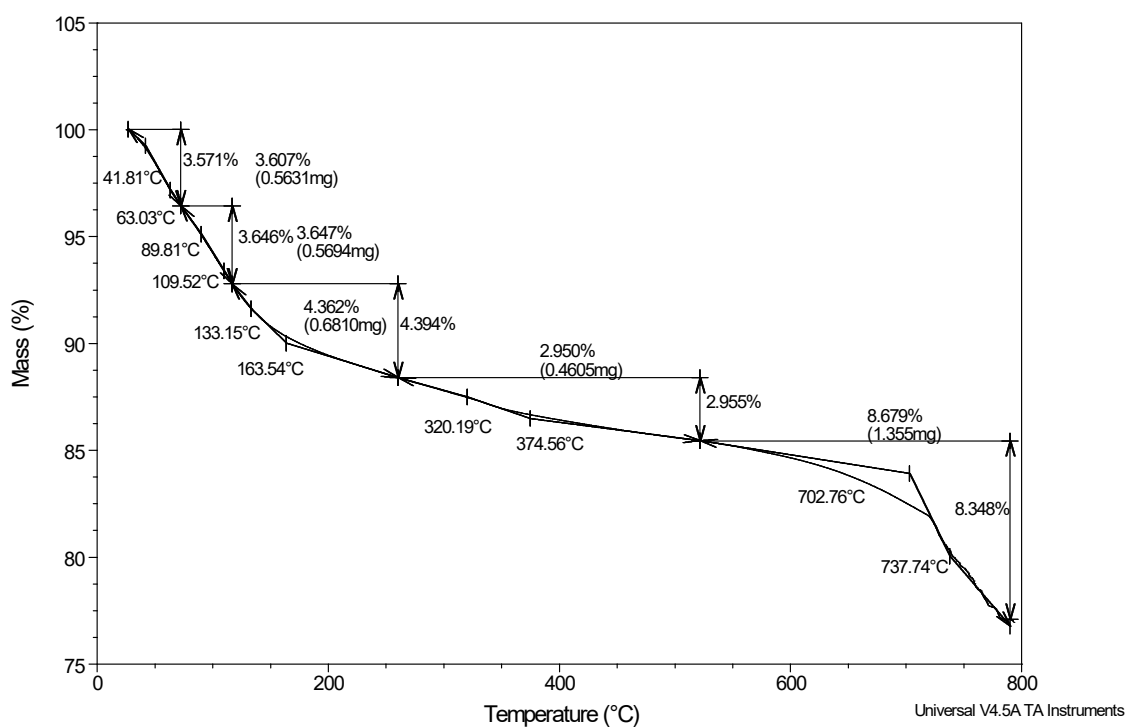

Graph A.14: TGA graph of oxidized silica-DNPH SSA-4

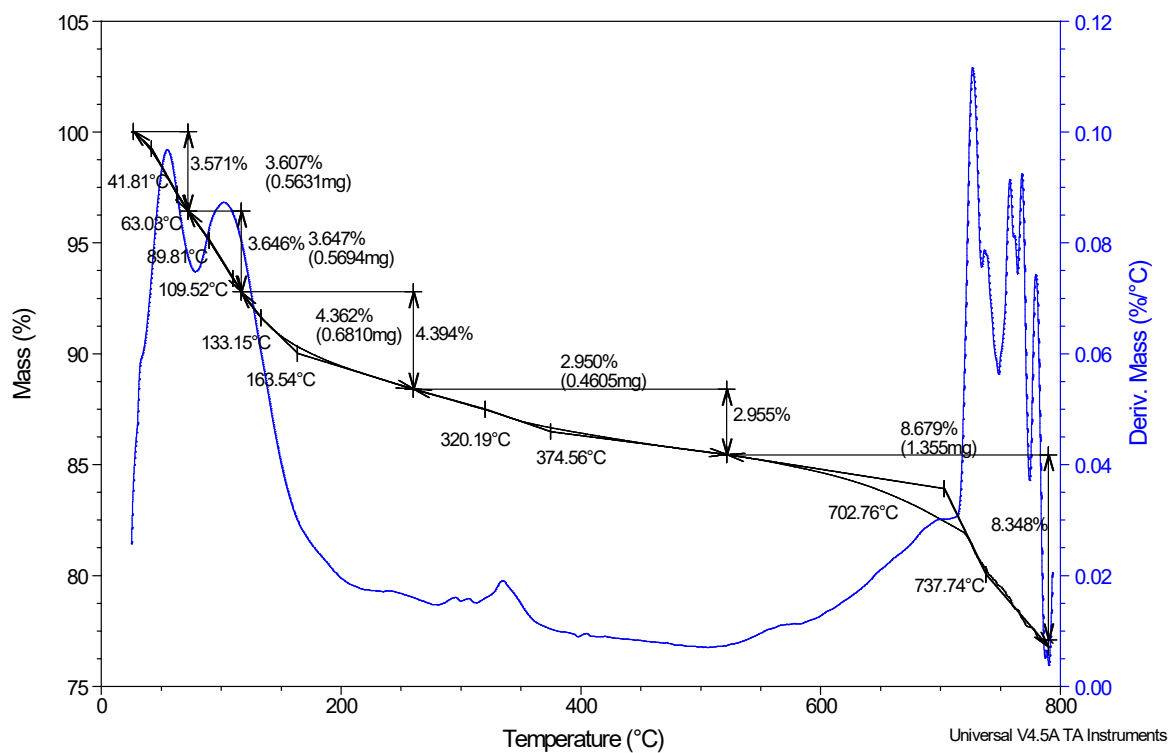

Graph A.15: TGA (black) and DTG (blue) of oxidized silica-DNPH SSA-4

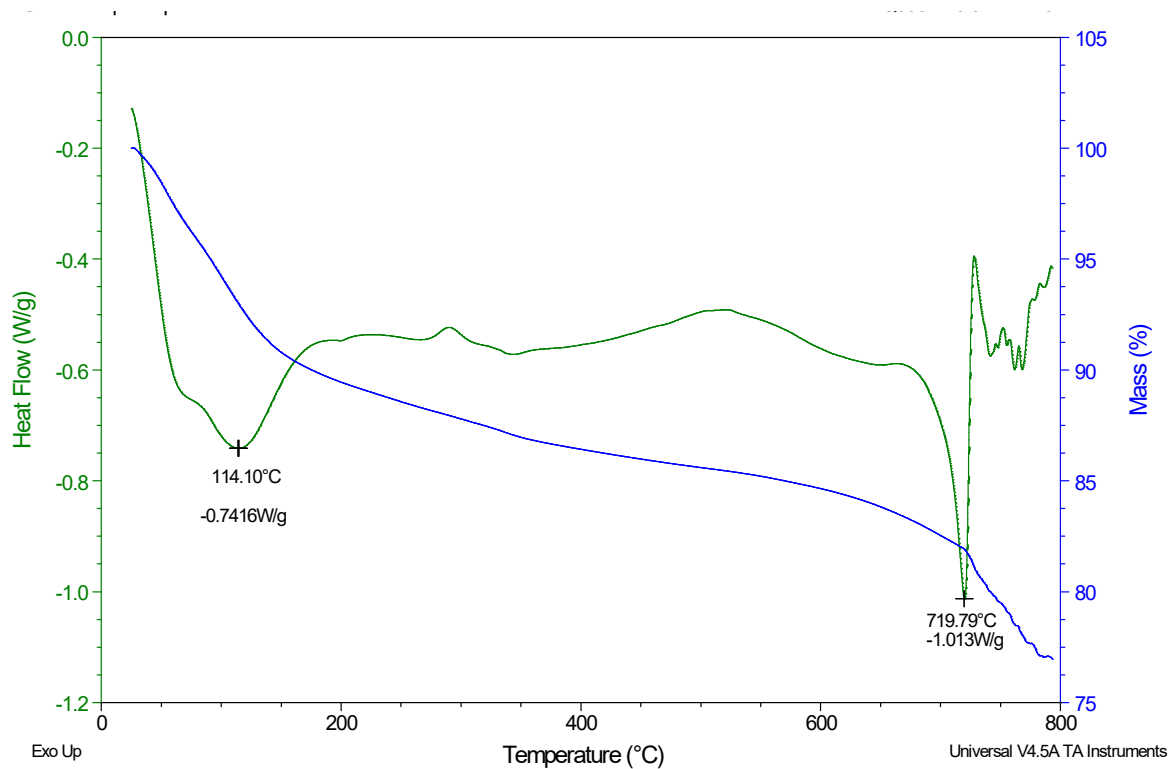

Graph A.16: DSC (green) and TGA (blue) of oxidized silica-DNPH SSA-4

#### A-3.4 SSA-5

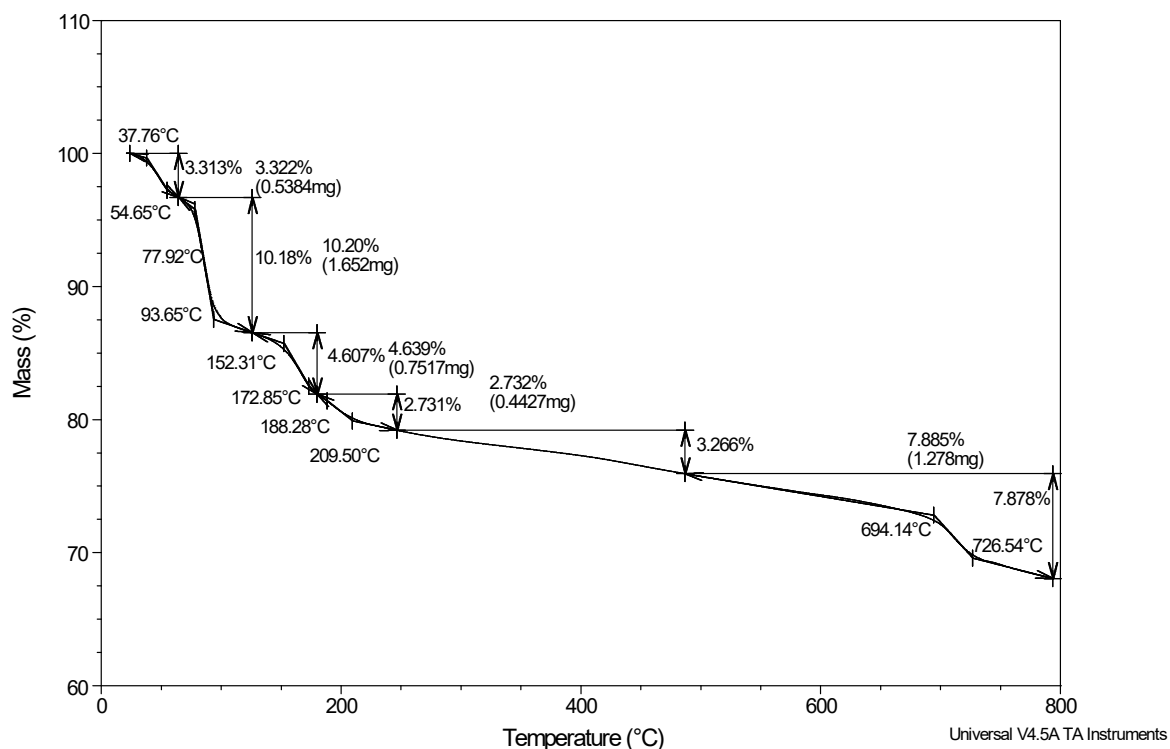

Graph A.17: TGA graph of oxidized silica-benzylated SSA-5

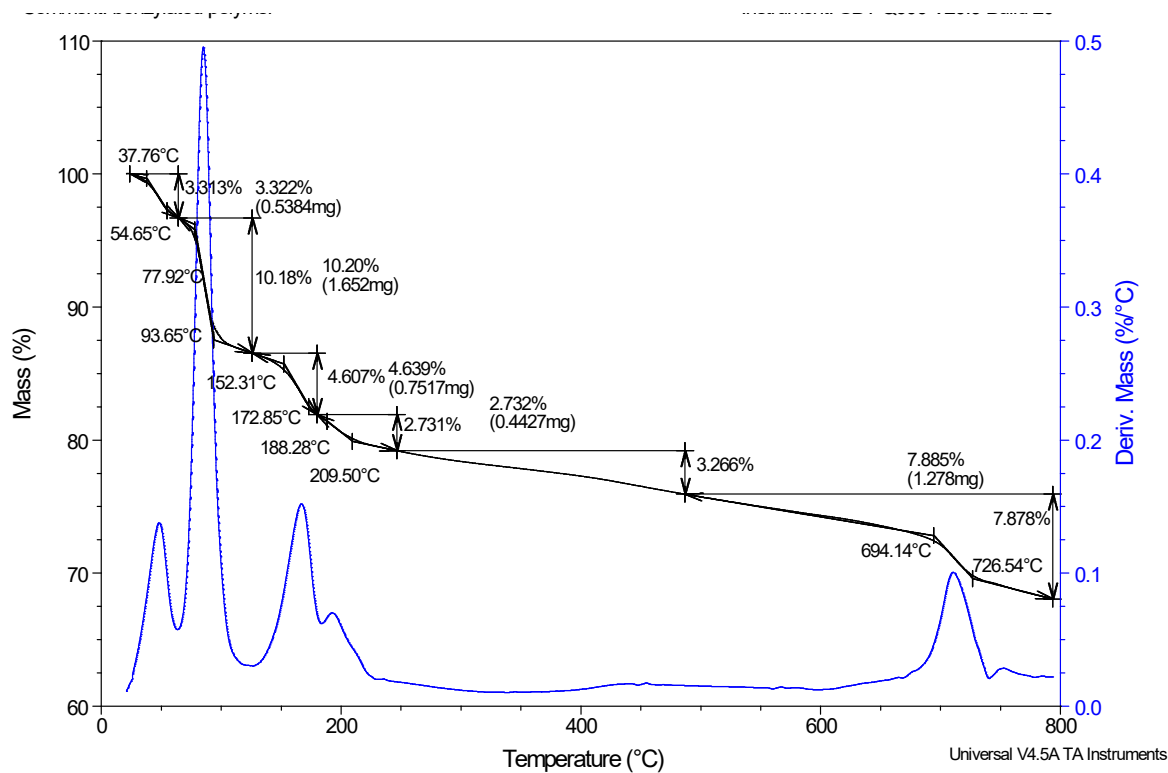

Graph A.18: TGA (black) and DTA (blue) of oxidized silica-benzylated SSA-5

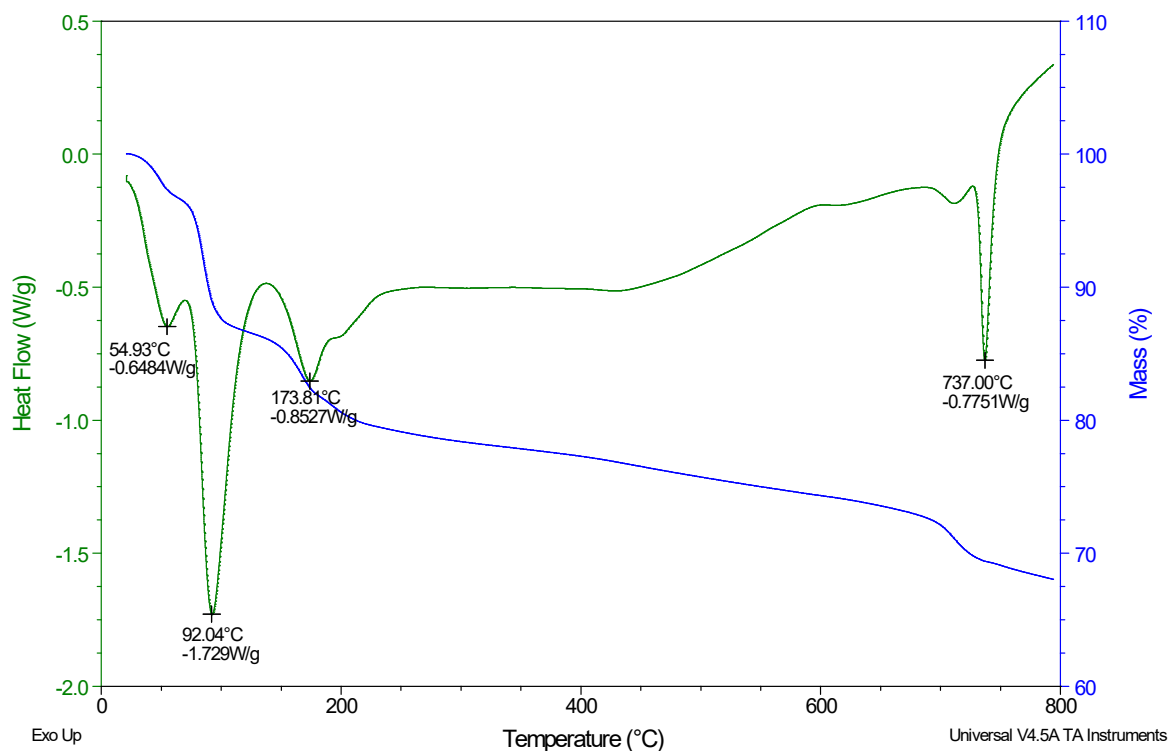

Graph A.19: DSC (green) and TGA (blue) of oxidized silica-benzylated SSA-5

## A-3.5 SSA-6

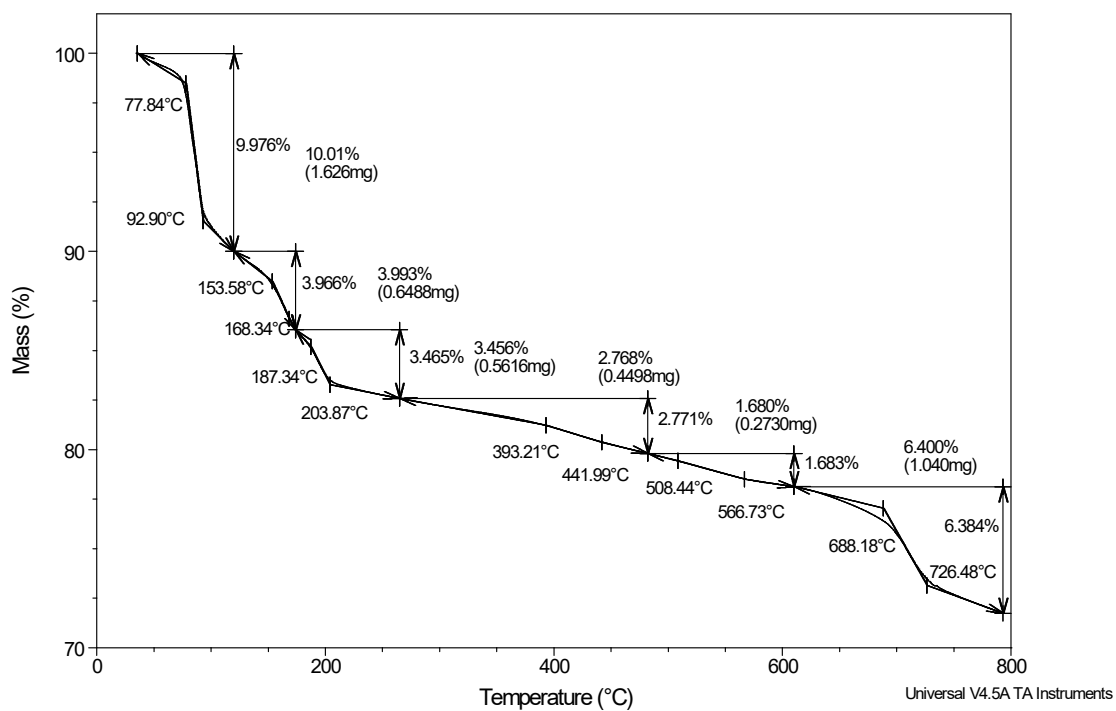

Graph A.20: TGA graph of silica-benzylated SSA-6

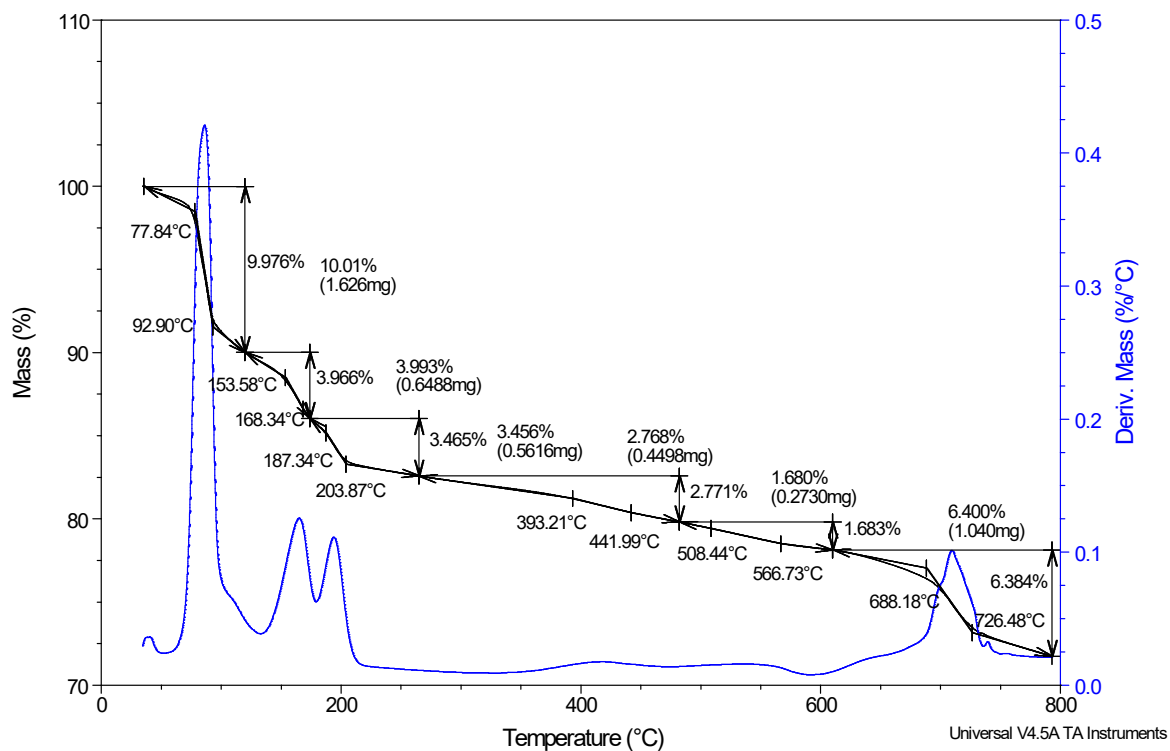

Graph A.21: TGA (black) and DTA (blue) graphs of silica-benzylated SSA-6

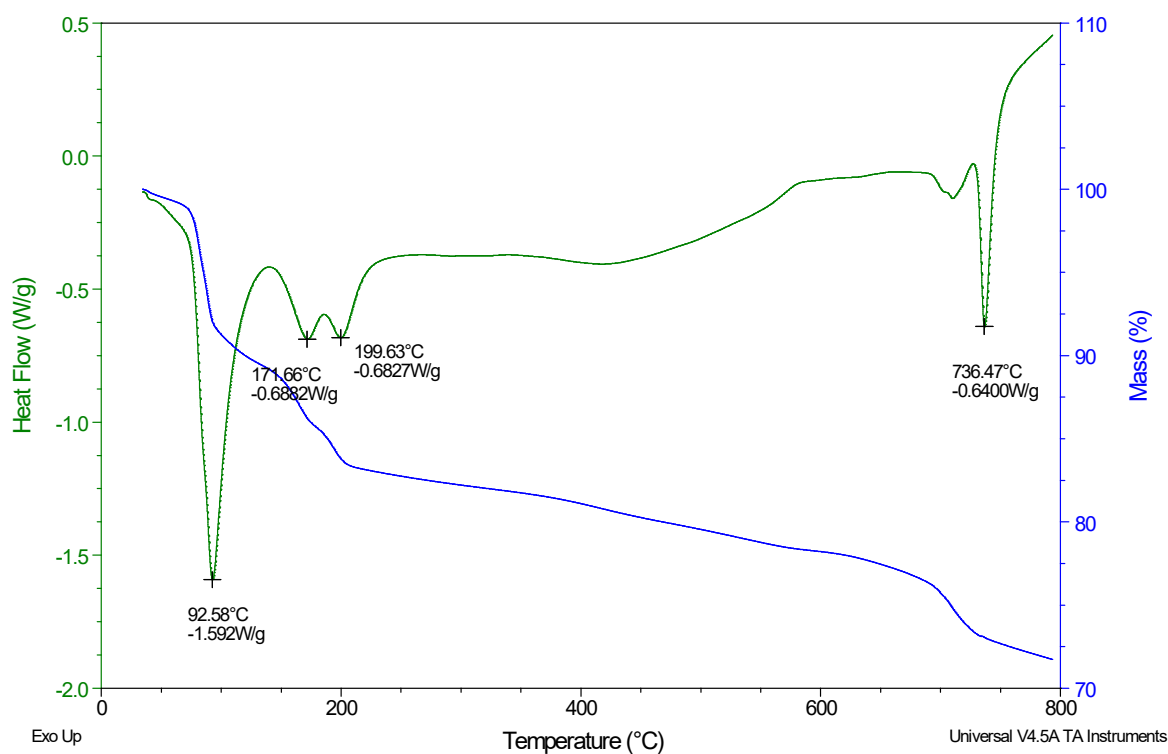

Graph A.22: DSC (green) and TGA (blue) of silica-benzylated SSA-6

## A-3.6 SSA-7

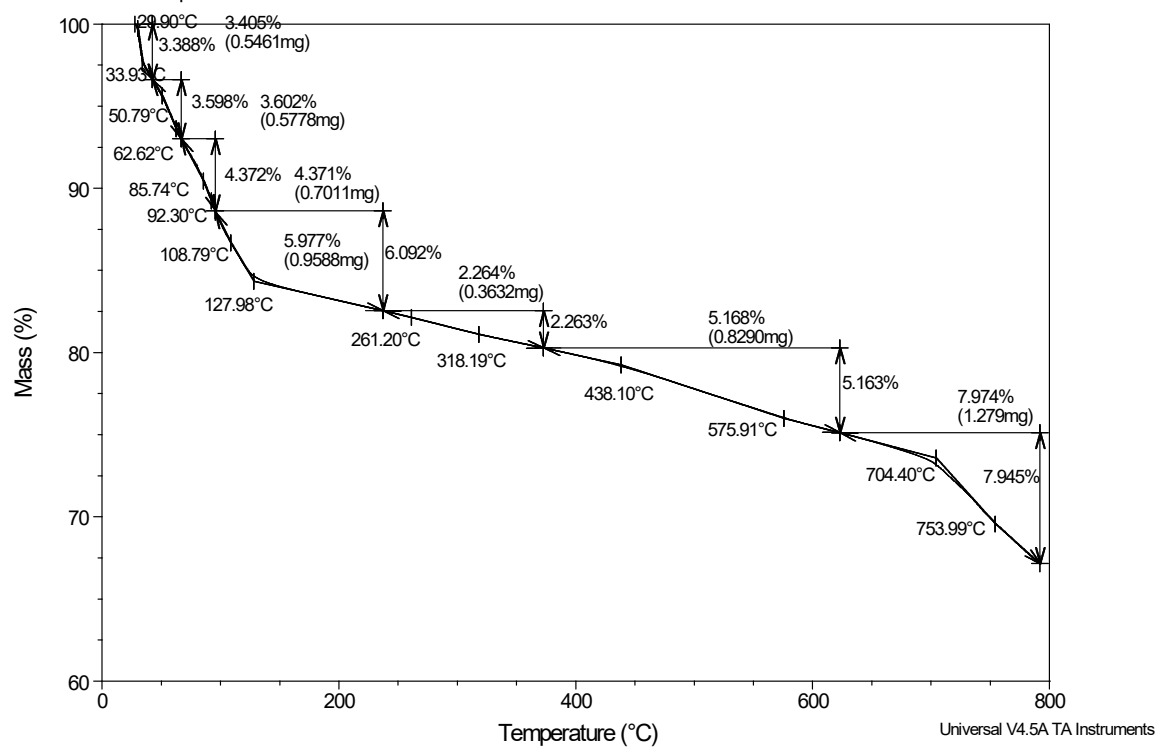

Graph A.23: TGA graph of silica-DNPH SSA-7

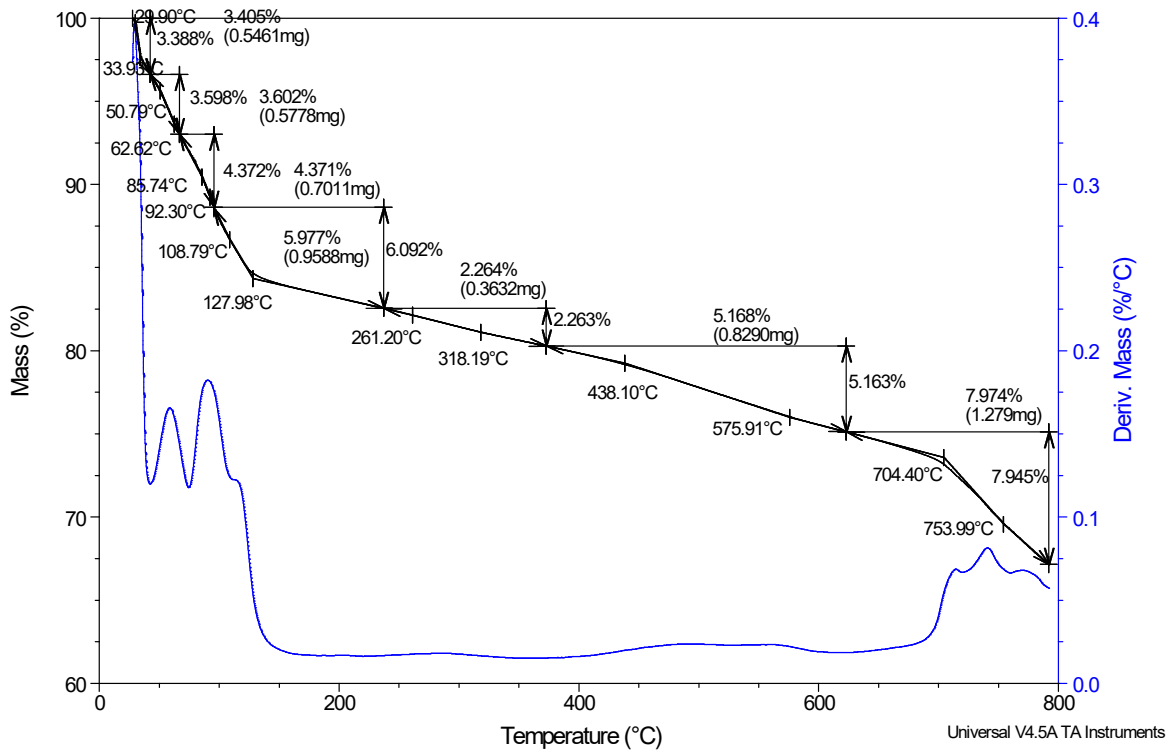

Graph A.24: TGA (black) and DTA (blue) of silica-DNPH SSA-7

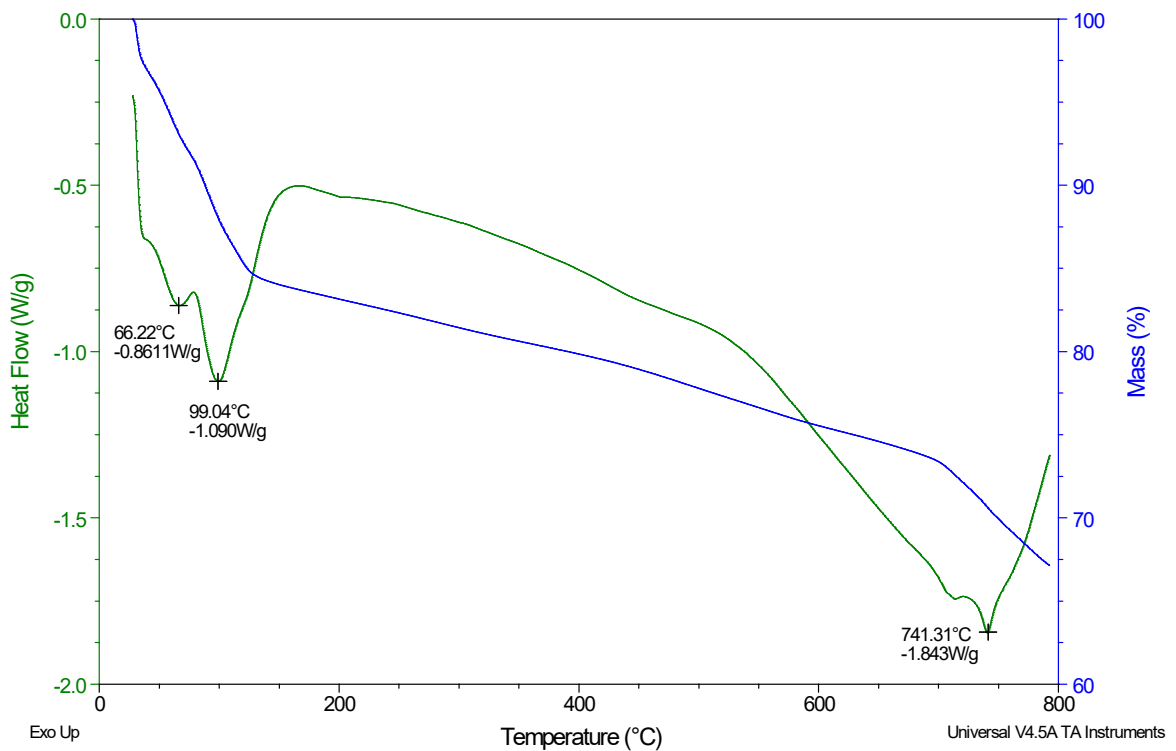

Graph A.25: DSC (green) and TGA (blue) of silica-DNPH SSA-7

## A-3.7 Combinations

## Silica and SSA-3

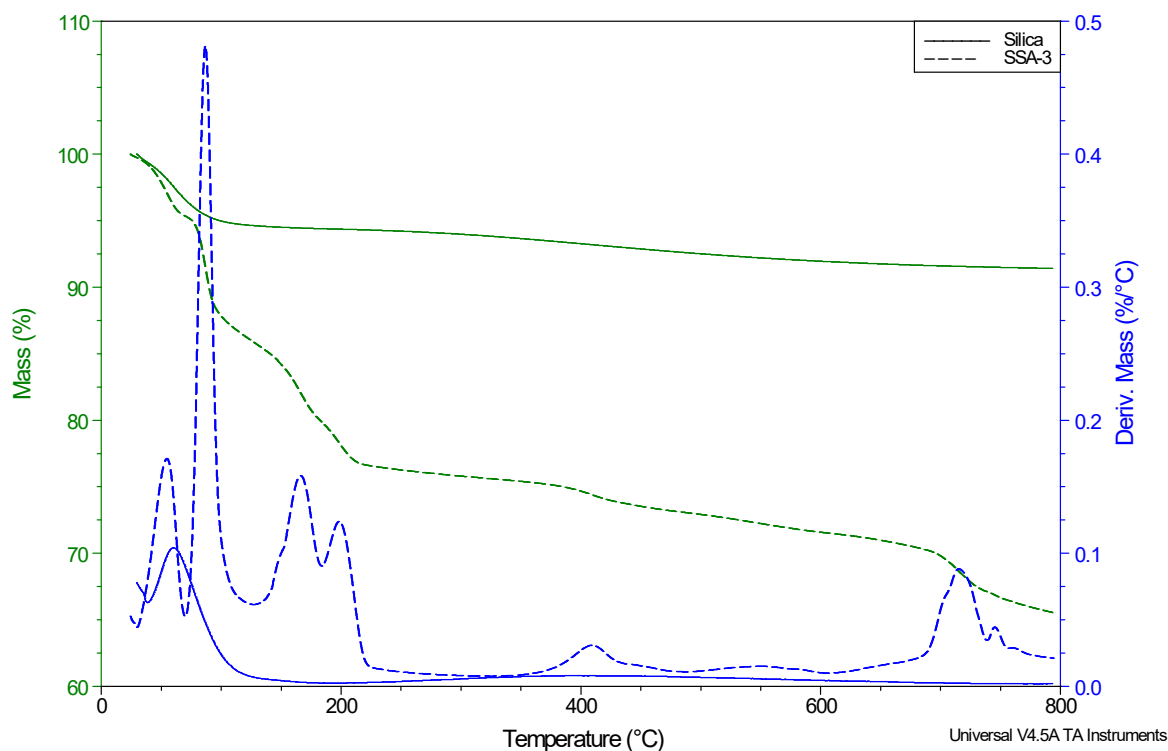

Graph A.26: Overlay of TGA (green) and DTA (blue) graphs of silica (solid line) and oxidized silica **SSA-3** (dashed line)

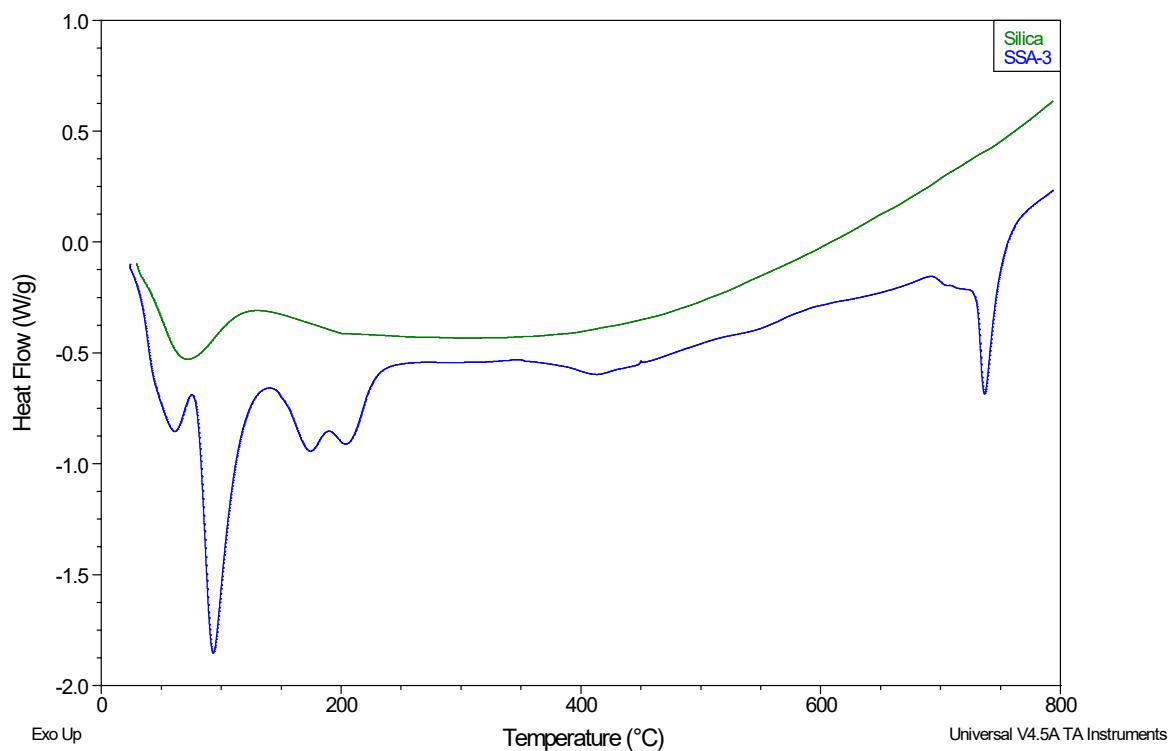

Graph A.27: Overlay of DSC graphs of silica (green) and oxidized silica **SSA-3** (blue)

## SSA-3 and SSA-4

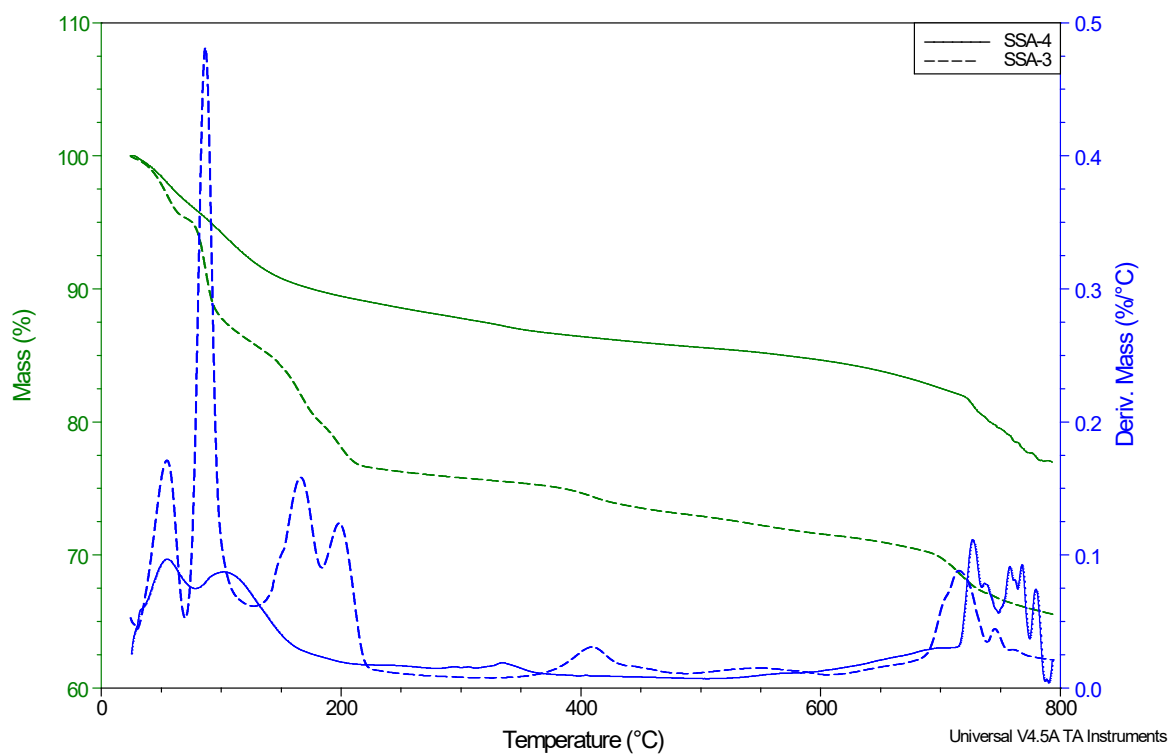

Graph A.28: Overlay of TGA (green) and DTA (blue) graphs of oxidized silica-DNPH **SSA-4** (solid line) and oxidized silica **SSA-3** (dashed line)

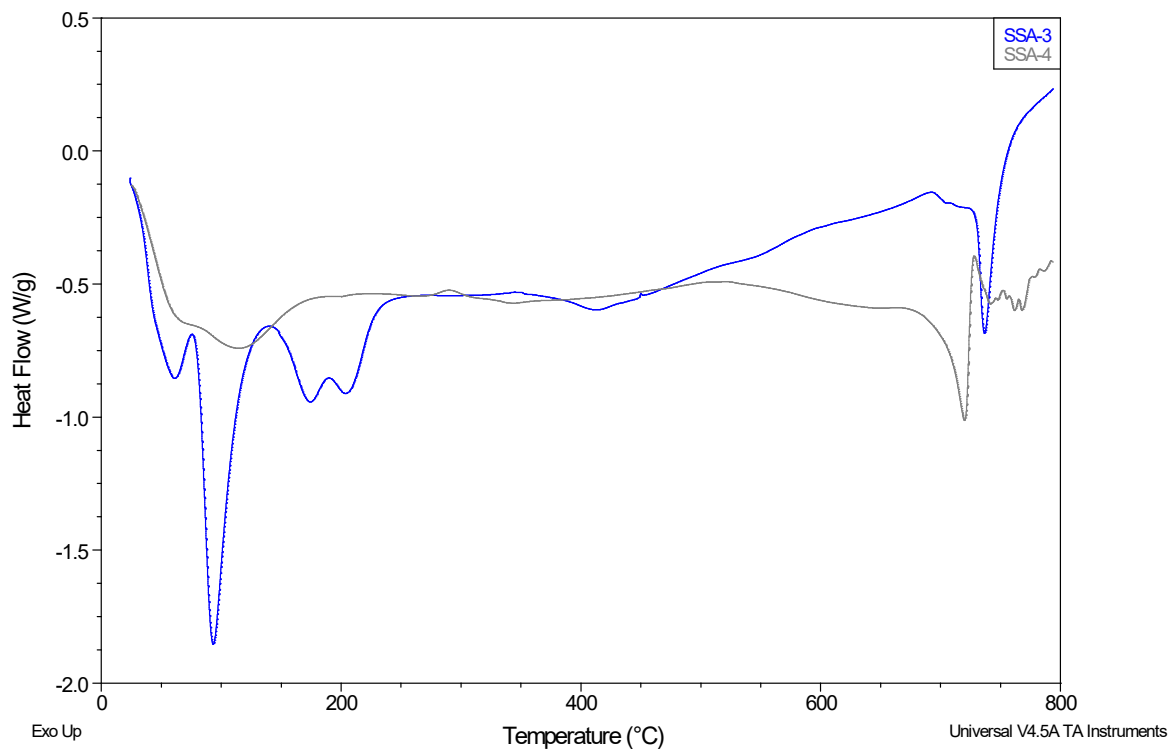

Graph A.29: Overlay of DSC graphs of oxidized silica-DNPH **SSA-4** (grey) and oxidized silica **SSA-3** (blue)

## SSA-3 and SSA-5

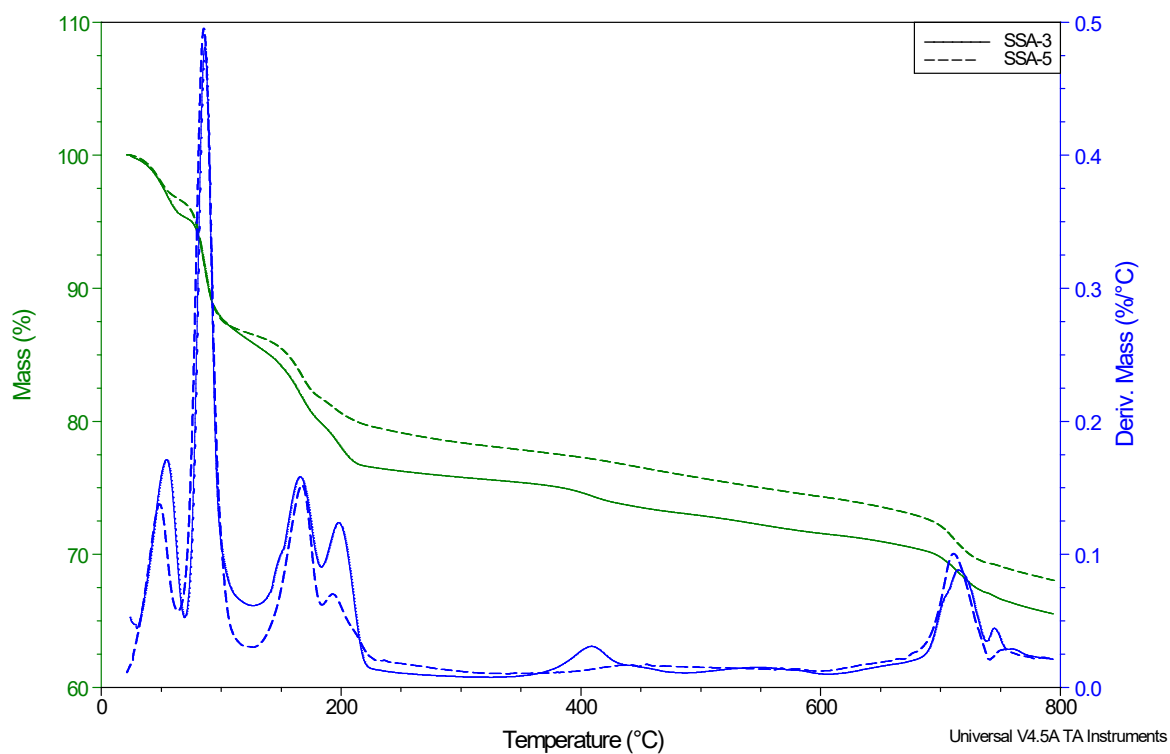

Graph A.30: Overlay of TGA (green) and DTA (blue) graphs of oxidized silica **SSA-3** (solid line) and oxidized silica-benzylated **SSA-5** (dashed line)

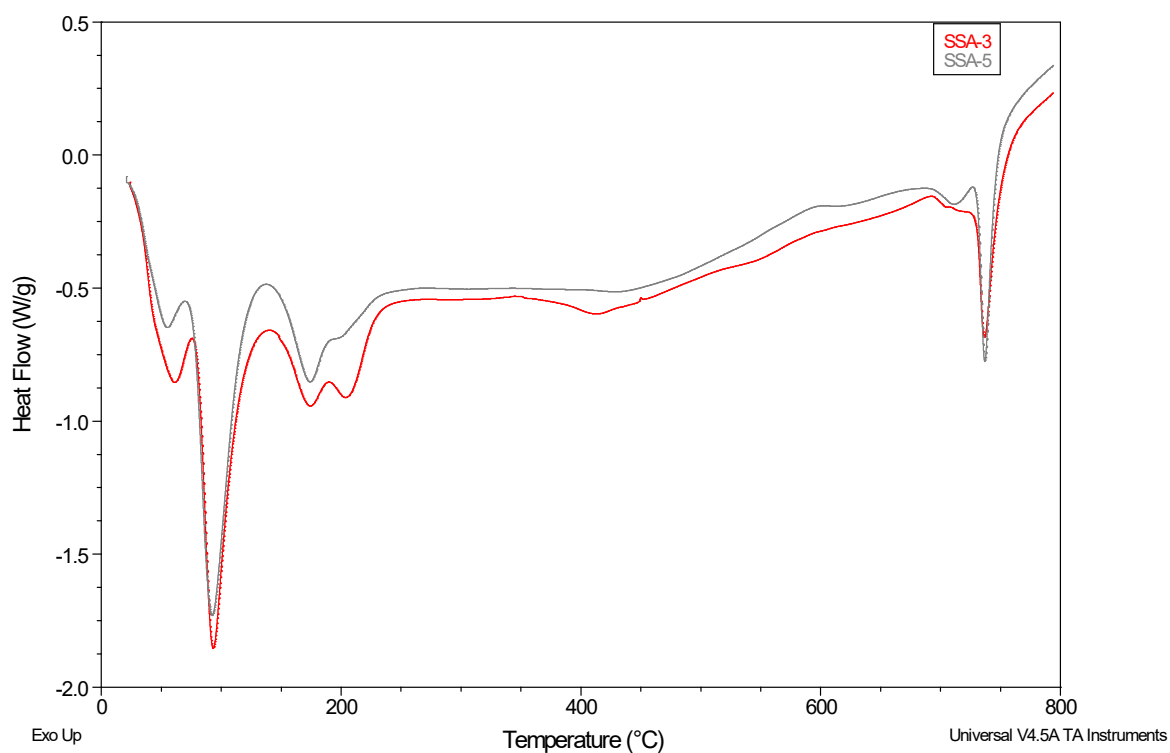

Graph A.31: Overlay of DSC graphs of oxidized silica **SSA-3** (red) and oxidized silica-benzylated **SSA-5** (grey)

SSA-3, SSA-4 and SSA-5

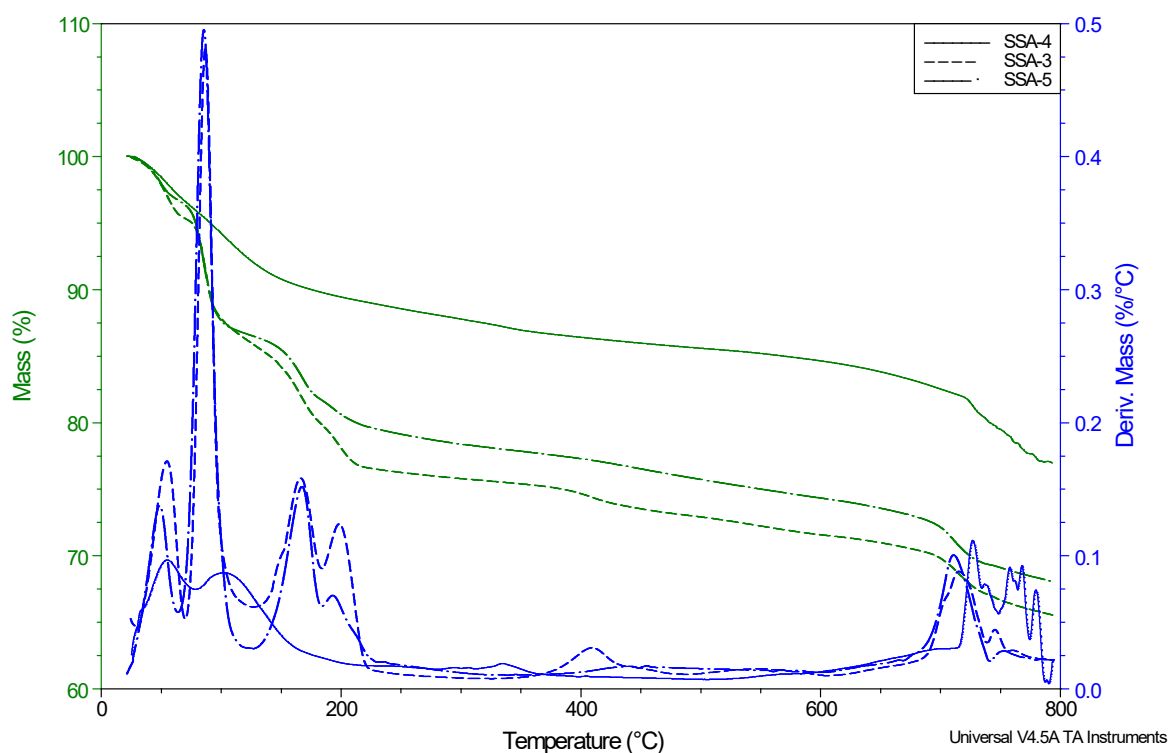

Graph A.32: Overlay of TGA (green) and DTA (blue) graphs of oxidized silica **SSA-3** (dashed line), oxidized silica-DNPH **SSA-4** (solid line) and oxidized silica-benzylated **SSA-5** (dashed-dot line)

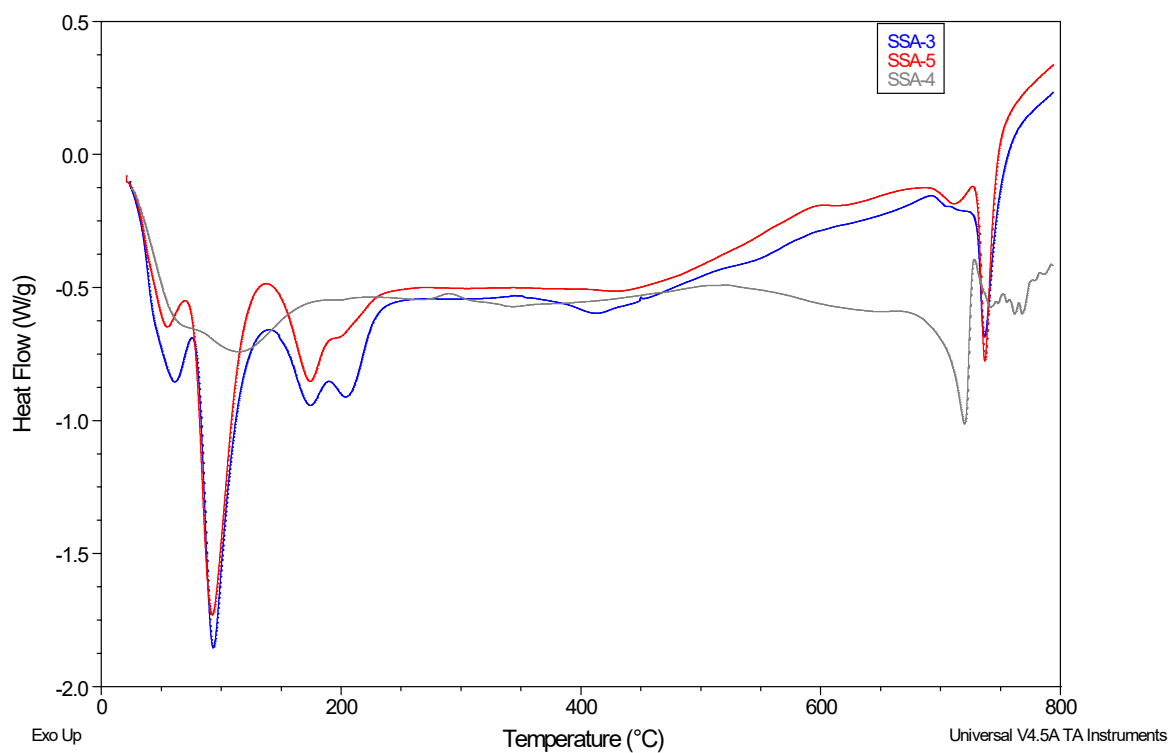

Graph A.33: Overlay of DSC graphs of oxidized silica **SSA-3** (blue), oxidized silica-DNPH **SSA-4** (grey) and oxidized silica-benzylated **SSA-5** (red)

## Silica and SSA-6

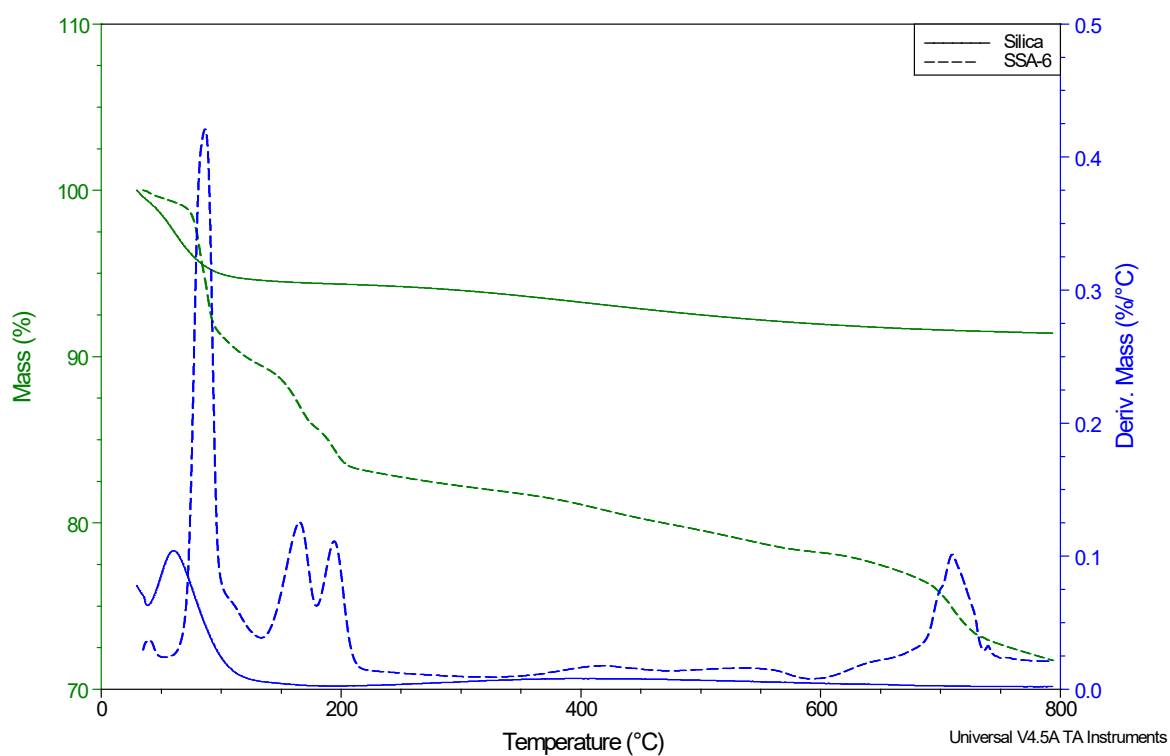

Graph A.34: Overlay of TGA (green) and DTA (blue) graphs of silica (solid line) and silica-benzylated SSA-6 (dashed line)

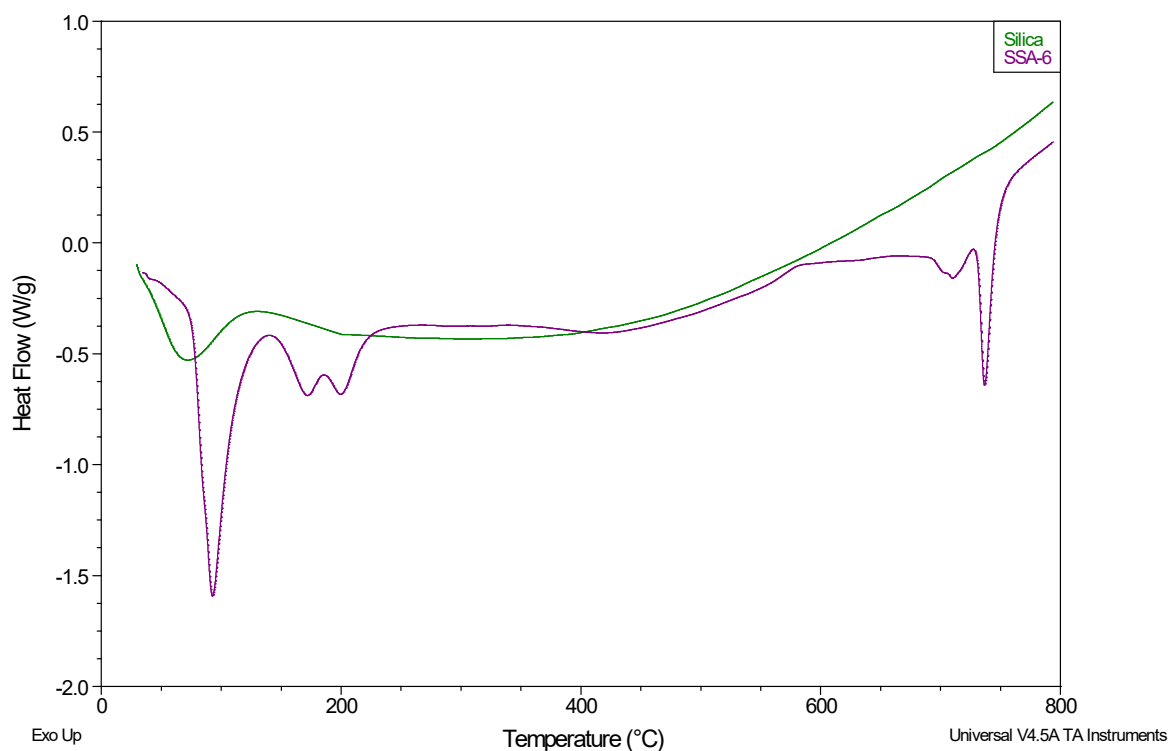

Graph A.35: Overlay of DSC graphs of silica (green) and silica-benzylated SSA-6 (purple)

## Silica and SSA-7

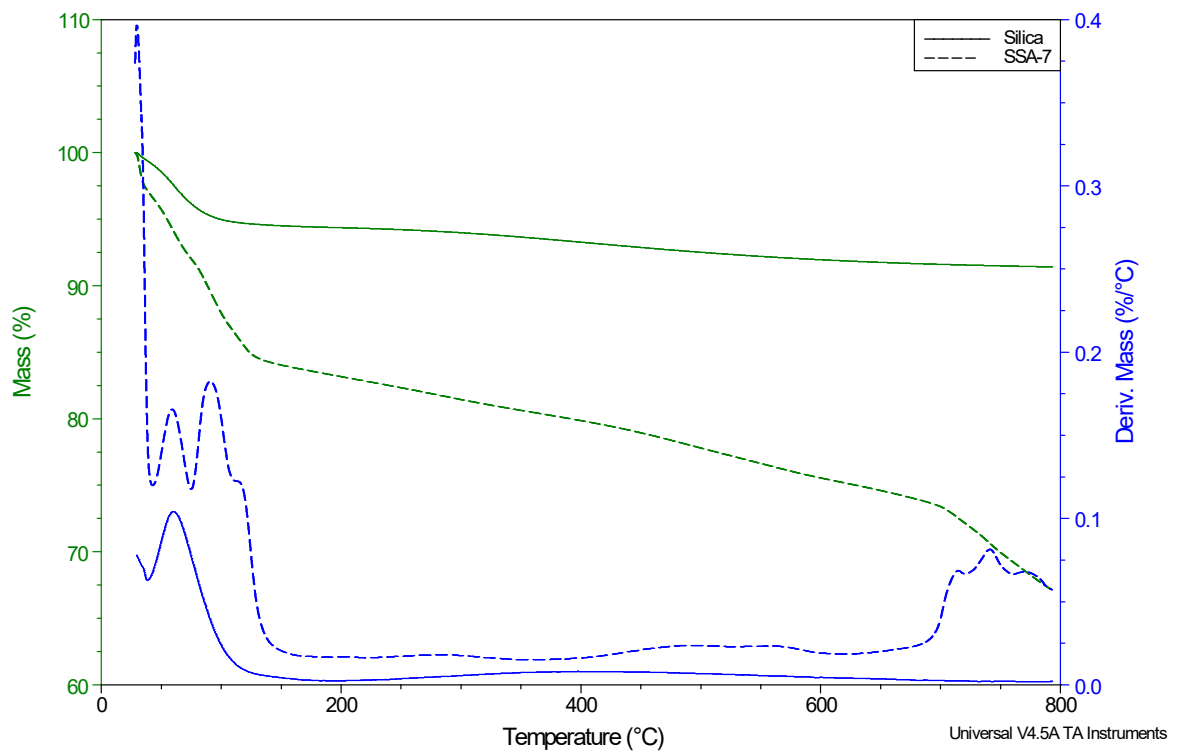

Graph A.36: Overlay of TGA (green) and DTA (blue) graphs of silica (solid line) and silica-DNPH SSA-7 (dashed line)

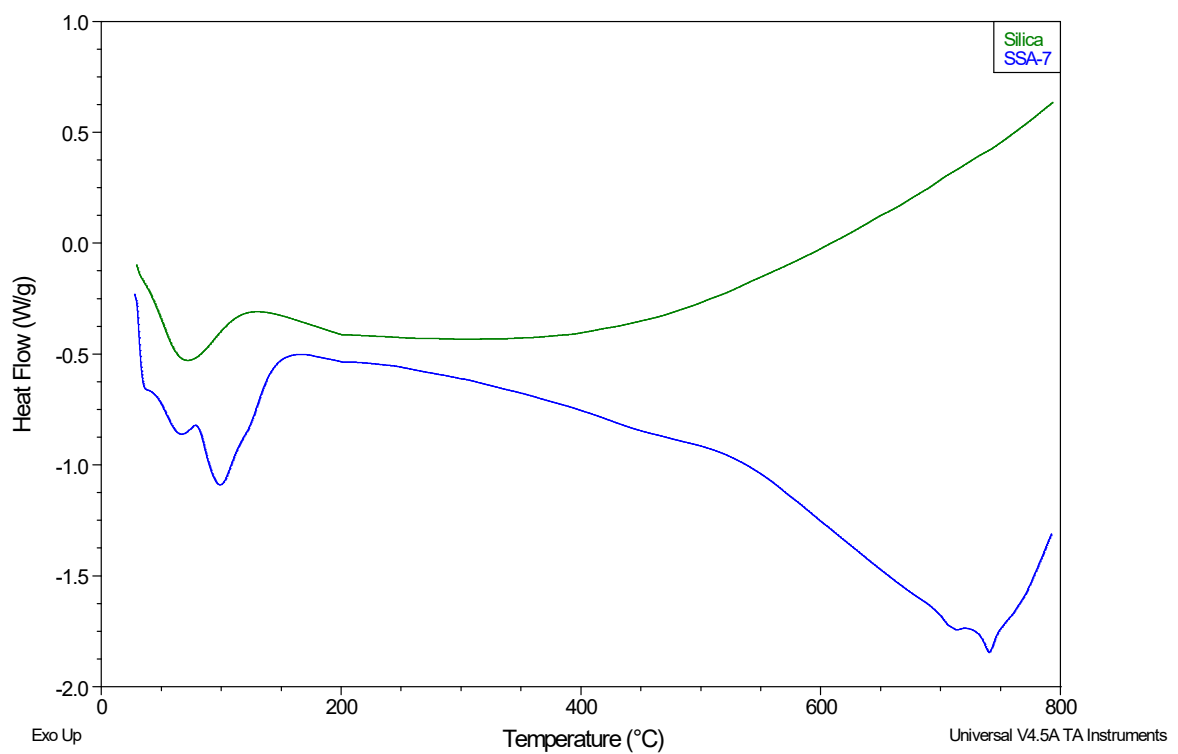

Graph A.37: Overlay of DSC graphs of silica (green) and silica-DNPH SSA-7 (blue)

## SSA-5 and SSA-6

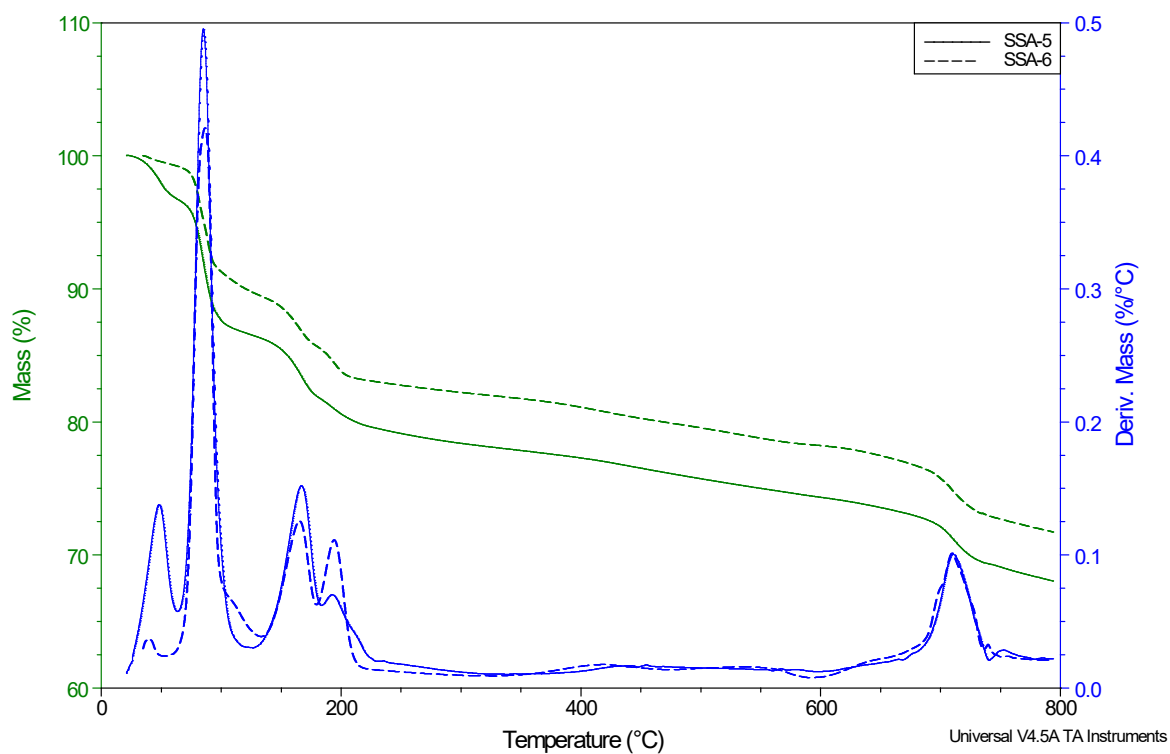

Graph A.38: Overlay of TGA (green) and DTA (blue) graphs of oxidized silica-benzylated **SSA-5** (solid line) and silica-benzylated **SSA-6** (dashed line)

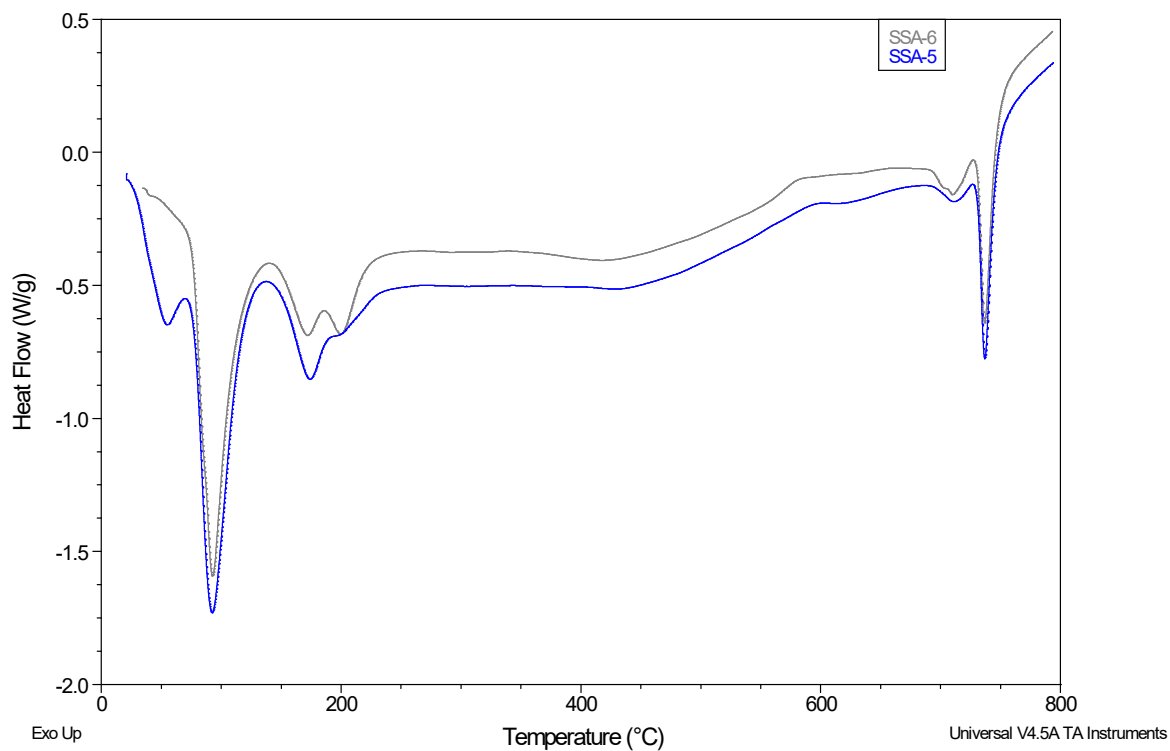

Graph A.39: Overlay of DSC graphs of oxidized silica-benzylated **SSA-5** (blue) and silica-benzylated **SSA-6** (grey)

## SSA-4 and SSA-7

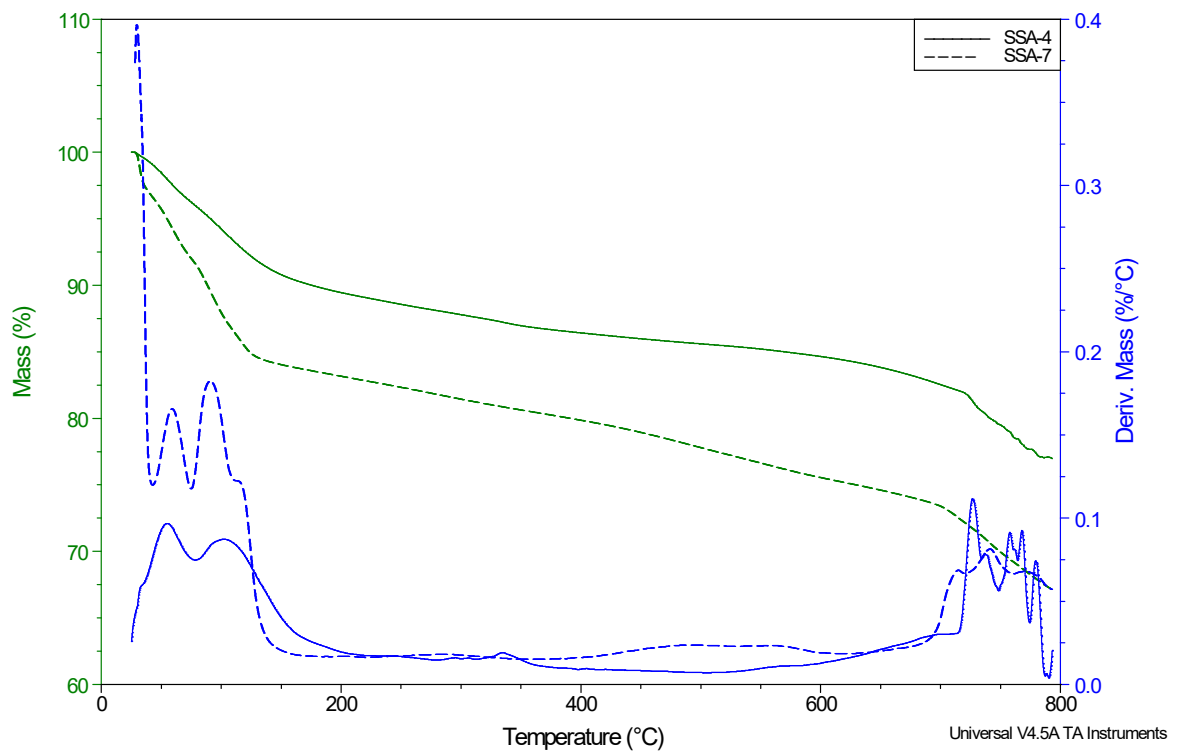

Graph A.40: Overlay of TGA (green) and DTA (blue) graphs of oxidized silica-DNPH **SSA-4** (solid line) and silica-DNPH **SSA-7** (dashed line)

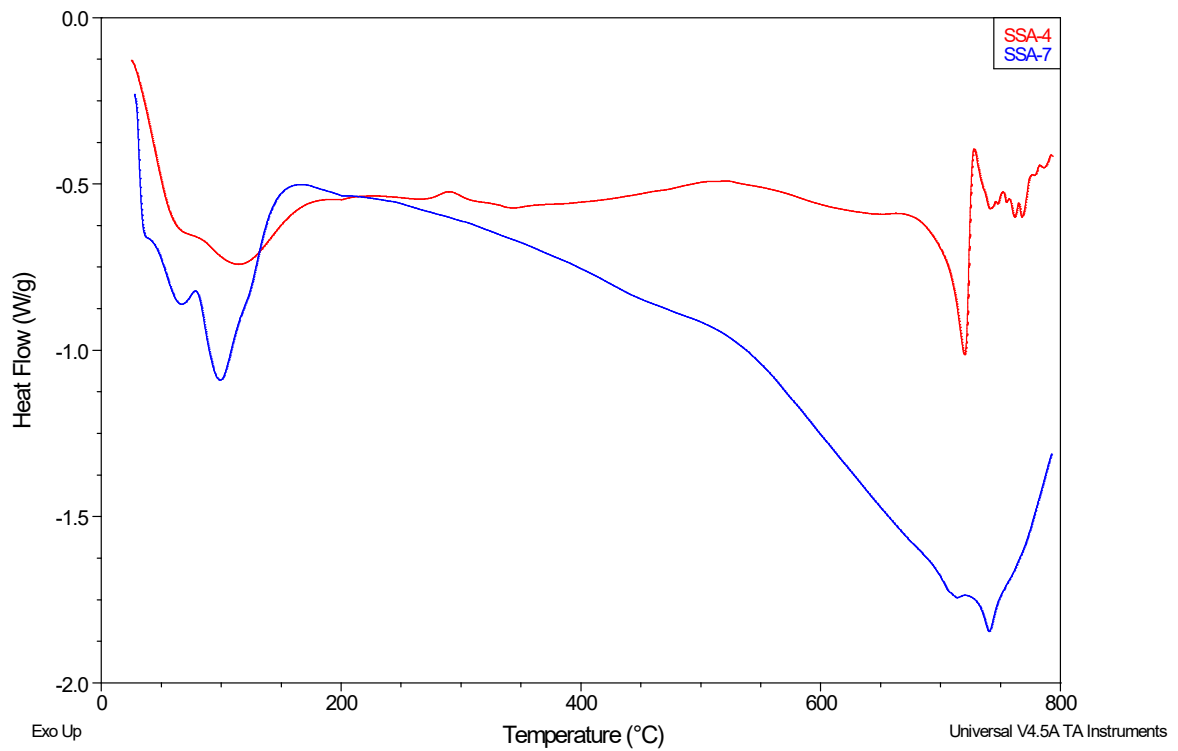

Graph A.41: Overlay of DSC graphs of oxidized silica-DNPH **SSA-4** (red) and silica-DNPH **SSA-7** (blue)

**A-4 PXR**D results

## A-4.1 Silica

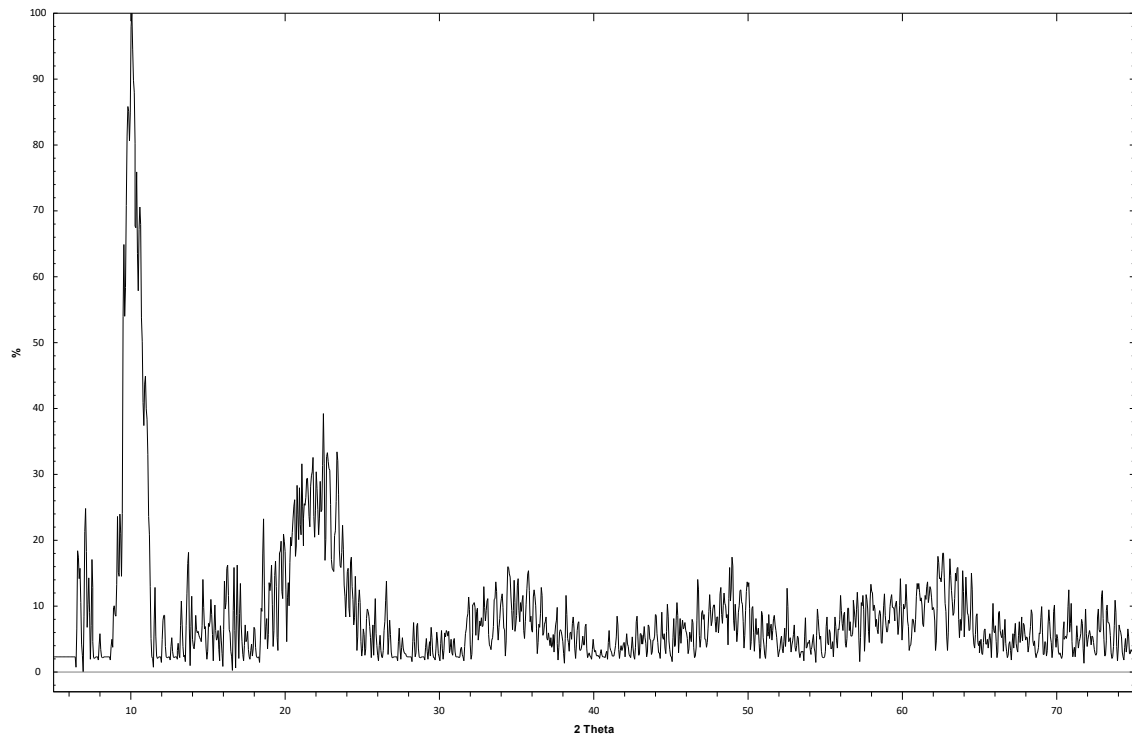*Graph A.42: PXR*D of Silica

| <b>2 theta</b> | <b>Percentage intensity</b> | <b>d-spacing</b> |
|----------------|-----------------------------|------------------|
| 7,07947        | 28,3                        | 12,47636531      |
| 10,1249        | 53,12                       | 8,729452571      |
| 21,4944        | 100                         | 4,130825951      |
| 62,5568        | 24,53                       | 1,48363737       |

## A-4.2 SSA-3

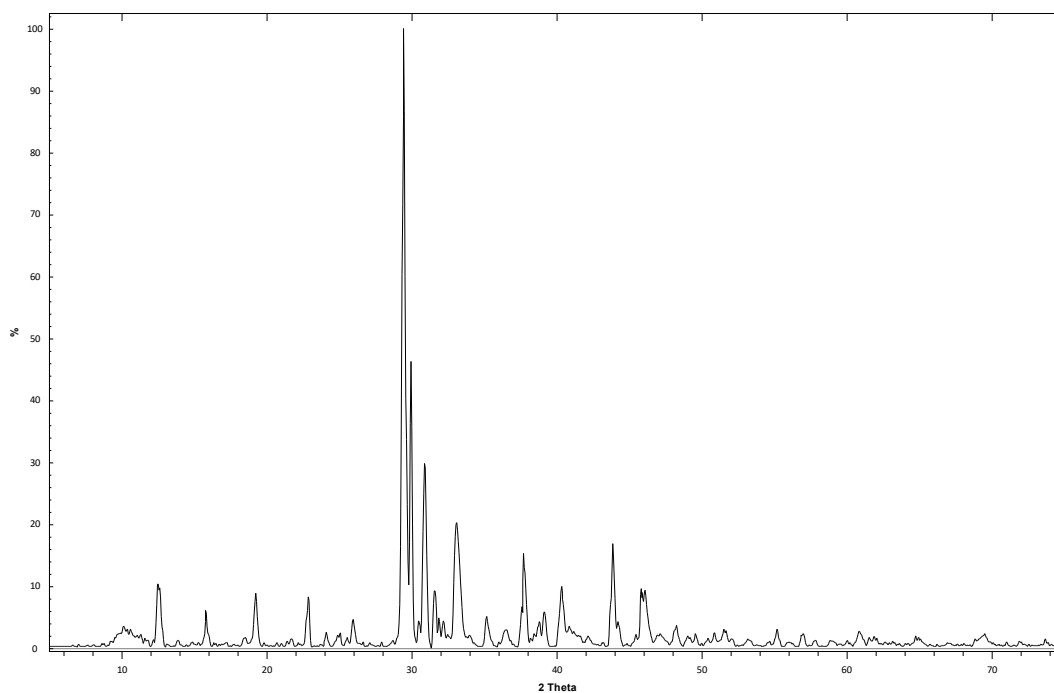Graph A.43: PXRD of oxidized Silica **SSA-3**

| <b>2 theta</b> | <b>Percentage intensity</b> | <b>d-spacing</b> |
|----------------|-----------------------------|------------------|
| 12,54736       | 12,67                       | 7,049013464      |
| 19,24955       | 10,25                       | 4,607192958      |
| 15,84567       | 7,64                        | 5,588391755      |
| 22,84111       | 8,95                        | 3,890227166      |
| 29,45318       | 100                         | 3,030209933      |
| 29,96609       | 37                          | 2,97950132       |
| 30,89258       | 32,33                       | 2,892222898      |
| 31,79323       | 11,88                       | 2,812315637      |
| 33,15102       | 25,84                       | 2,700166308      |
| 37,76793       | 15,63                       | 2,380020821      |
| 40,3661        | 11,92                       | 2,23262066       |
| 43,89955       | 17,19                       | 2,06076246       |
| 46,02096       | 12,55                       | 1,970583272      |

## A-4.3 SSA-4

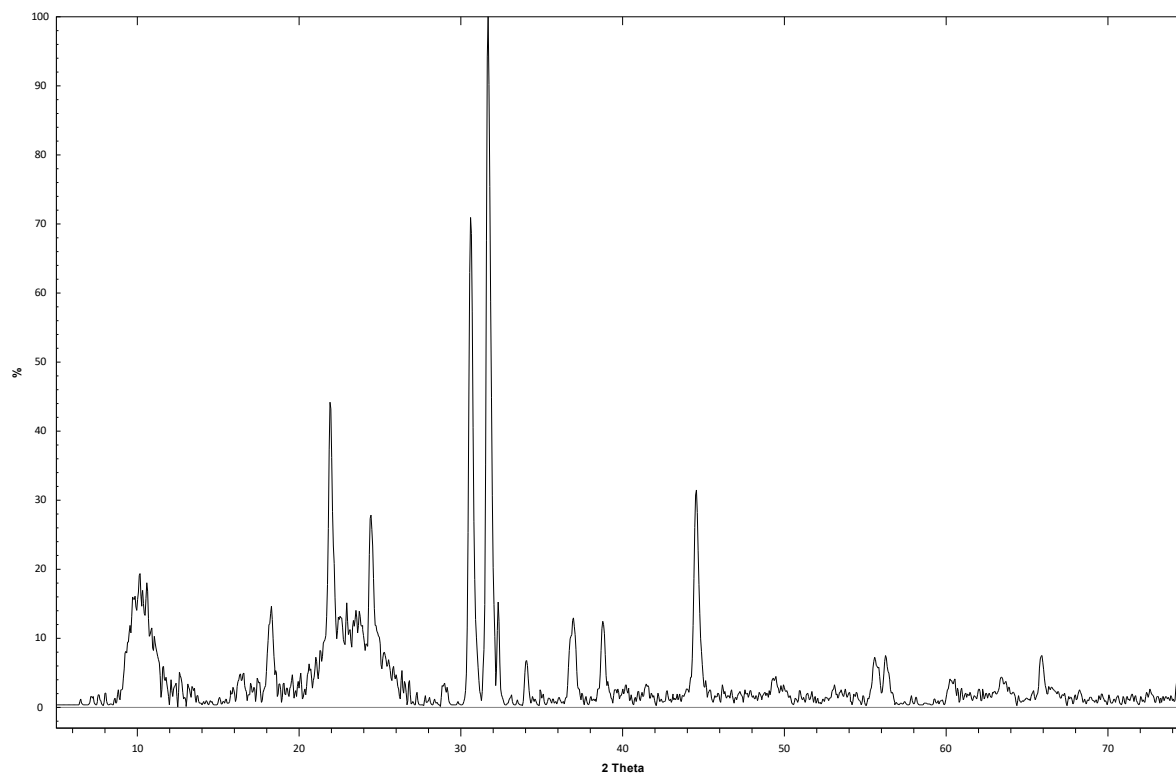

Graph A.44: PXRD of oxidized Silica-DNPH SSA-4

| <b>2 theta</b> | <b>Percentage intensity</b> | <b>d-spacing</b> |
|----------------|-----------------------------|------------------|
| 6,97796        | 9,15                        | 12,65763         |
| 10,2264        | 21                          | 8,643037         |
| 18,246         | 13,76                       | 4,858269         |
| 21,95          | 47,71                       | 4,046104         |
| 23,5247        | 23,41                       | 3,778707         |
| 24,5399        | 37,04                       | 3,624635         |
| 30,6815        | 72,6                        | 2,911638         |
| 31,7473        | 100                         | 2,816279         |
| 36,9246        | 13,67                       | 2,432419         |
| 38,8533        | 12,21                       | 2,315996         |
| 44,5889        | 30,91                       | 2,03049          |
| 55,7046        | 8,38                        | 1,64878          |
| 56,3645        | 8,1                         | 1,631032         |
| 65,9575        | 7,69                        | 1,41514          |

## A-4.4 SSA-5

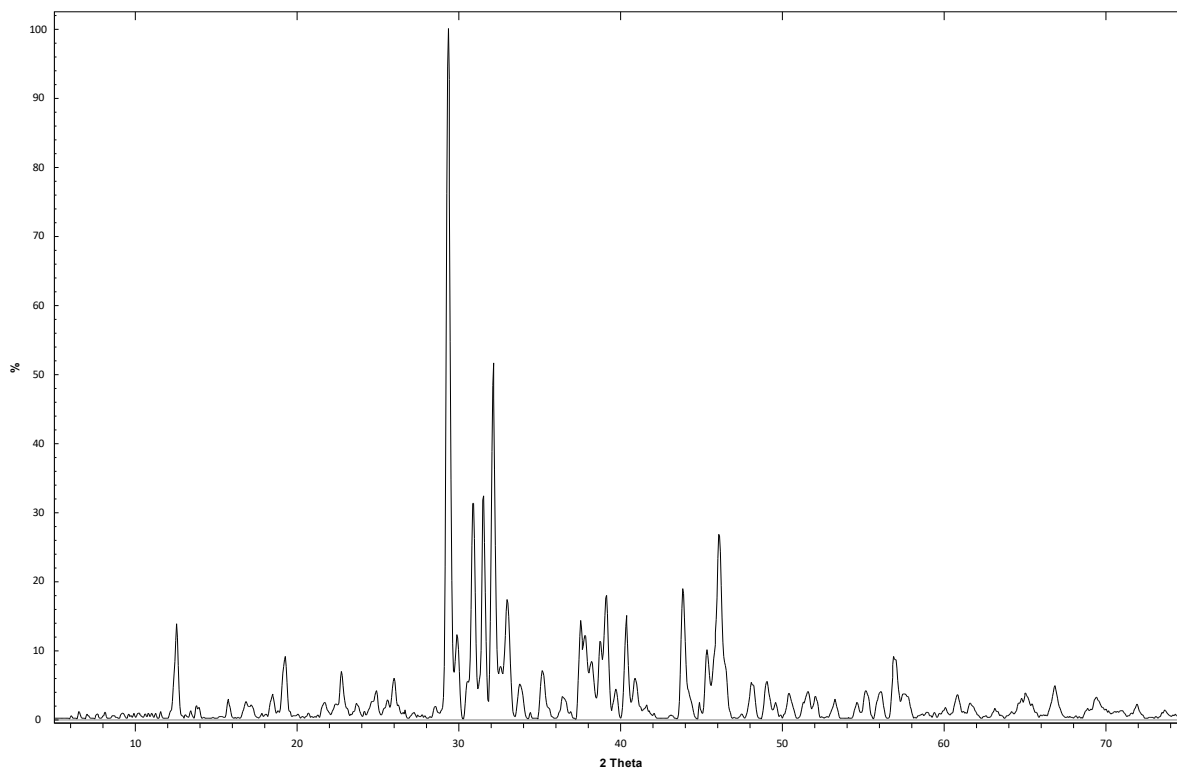

Graph A.45: PXRD of oxidized Silica- benzylated SSA-5

| <b>2 theta</b> | <b>Percentage intensity</b> | <b>d-spacing</b> |
|----------------|-----------------------------|------------------|
| 12,515         | 11,94                       | 7,067167272      |
| 19,2611        | 9,03                        | 4,604456279      |
| 29,3618        | 100                         | 3,039432314      |
| 30,8845        | 28,91                       | 2,892961143      |
| 31,4936        | 26,48                       | 2,838385271      |
| 32,1534        | 49,11                       | 2,781630438      |
| 33,067         | 16,53                       | 2,706834941      |
| 37,5844        | 14,85                       | 2,391219983      |
| 39,1071        | 17,44                       | 2,301548382      |
| 40,376         | 14,34                       | 2,232096068      |
| 43,929         | 18,47                       | 2,059449206      |
| 46,1623        | 26,21                       | 1,964878196      |
| 56,9736        | 11,32                       | 1,615032715      |

## A-4.5 SSA-6

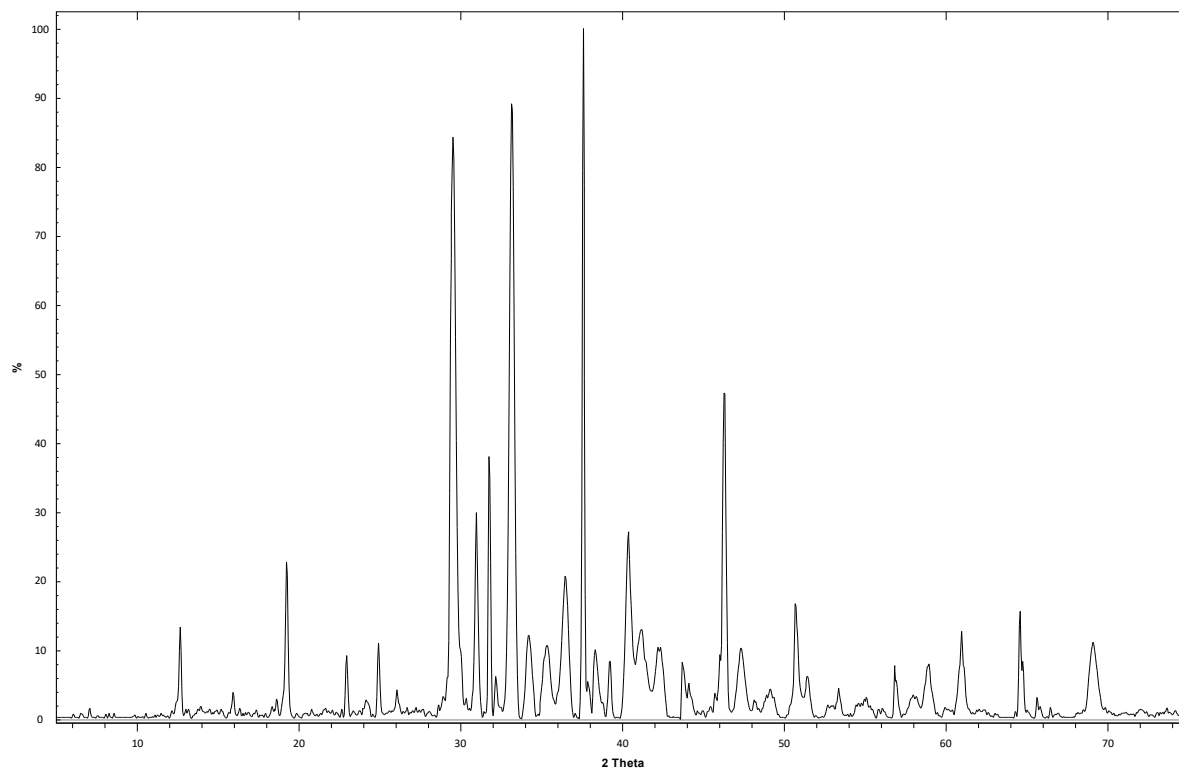

Graph A.46: PXRD of Silica-benzylated SSA-6

| <b>2 theta</b> | <b>Percentage intensity</b> | <b>d-spacing</b> |
|----------------|-----------------------------|------------------|
| 12,6627        | 11,61                       | 6,985065         |
| 19,2611        | 21,47                       | 4,604456         |
| 22,9156        | 9,03                        | 3,87775          |
| 24,9459        | 11,05                       | 3,566556         |
| 29,5648        | 97,3                        | 3,019023         |
| 30,986         | 30,66                       | 2,883716         |
| 31,7981        | 32,97                       | 2,811896         |
| 33,1685        | 100                         | 2,698783         |
| 34,2344        | 19,72                       | 2,617155         |
| 35,3511        | 19,7                        | 2,536999         |
| 36,5185        | 30,17                       | 2,458531         |
| 37,5844        | 83,5                        | 2,39122          |
| 38,3458        | 16,35                       | 2,345473         |
| 40,376         | 33,38                       | 2,232096         |
| 41,1374        | 19,18                       | 2,192524         |
| 42,3556        | 16,63                       | 2,13224          |
| 43,7767        | 10,99                       | 2,06626          |
| 46,3146        | 46,94                       | 1,958771         |
| 47,3805        | 13,72                       | 1,917161         |
| 50,7304        | 19,05                       | 1,798143         |
| 56,872         | 10,09                       | 1,617676         |
| 58,9023        | 10,92                       | 1,566665         |
| 60,9834        | 14,33                       | 1,518091         |
| 64,6379        | 16,52                       | 1,440804         |
| 69,0537        | 15,2                        | 1,359051         |

## A-4.6 SSA-7

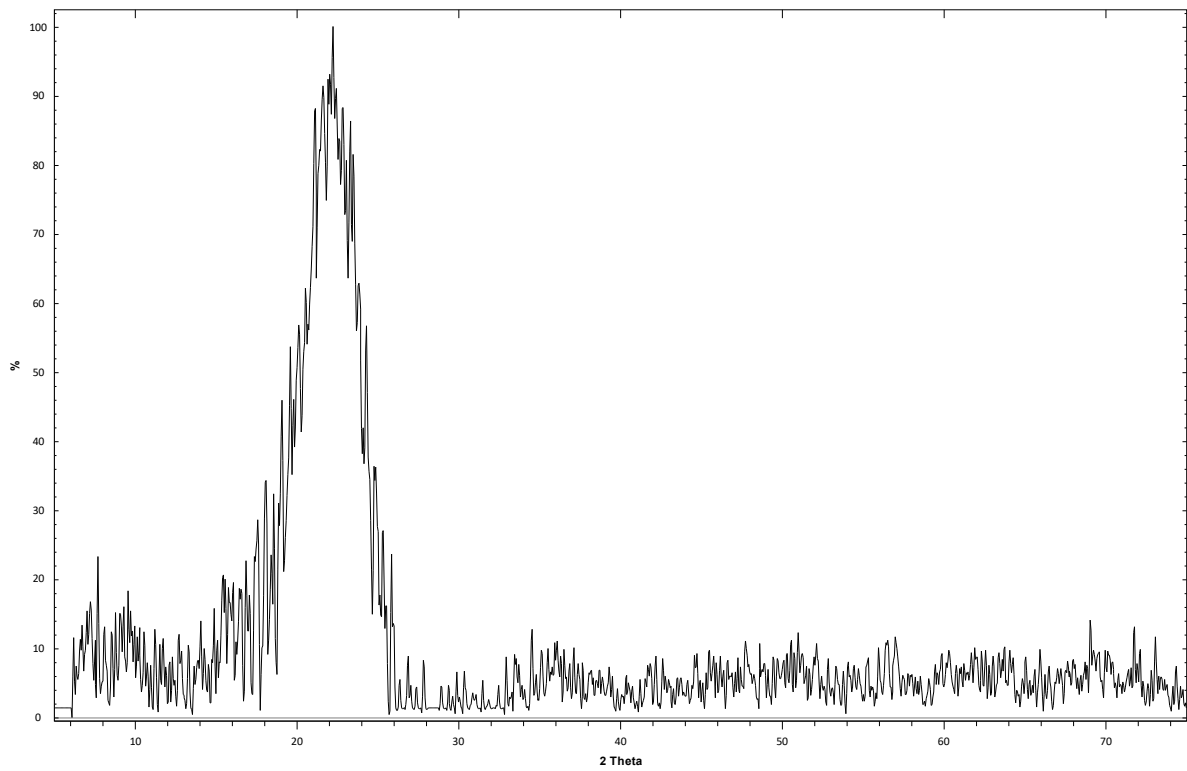*Graph A.47: PXRD of Silica-DNPH SSA-7*

| <b>2 theta</b> | <b>Percentage intensity</b> | <b>d-spacing</b> |
|----------------|-----------------------------|------------------|
| 9,41429        | 11,06                       | 9,386714455      |
| 22,2558        | 100                         | 3,991196237      |

## A-4.7 Combinations

*Silica and SSA-3*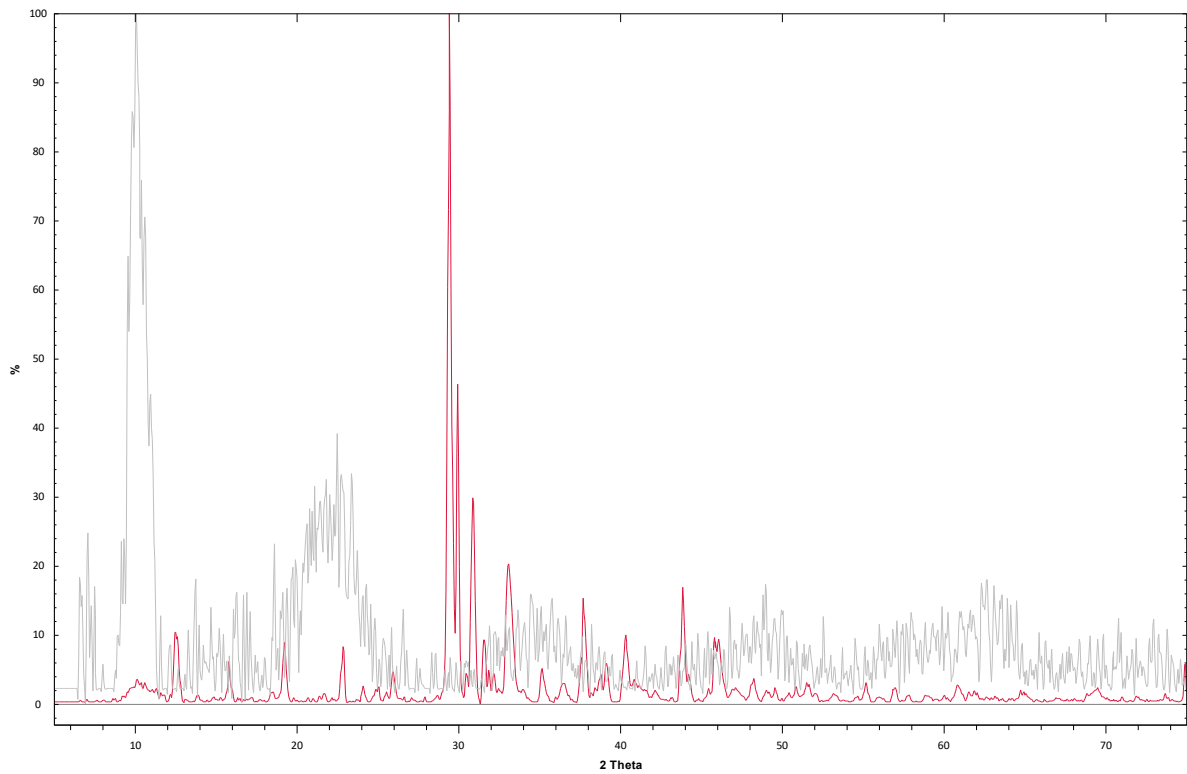

*Graph A.48: PXR overlay of Silica (grey) and oxidized silica SSA-3 (red)*

*SSA-3 and SSA-4*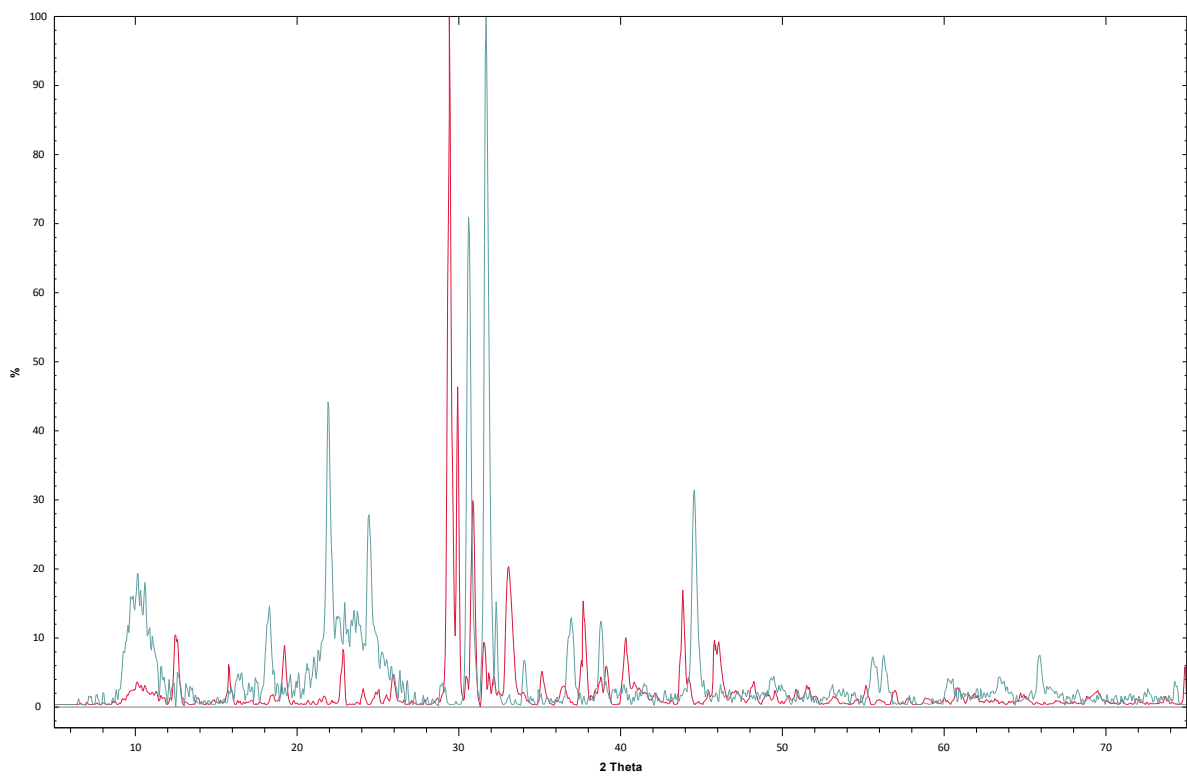

*Graph A.49: PXR overlay of oxidized silica SSA-3 (red) and oxidized silica-DNPH SSA-4 (blue)*

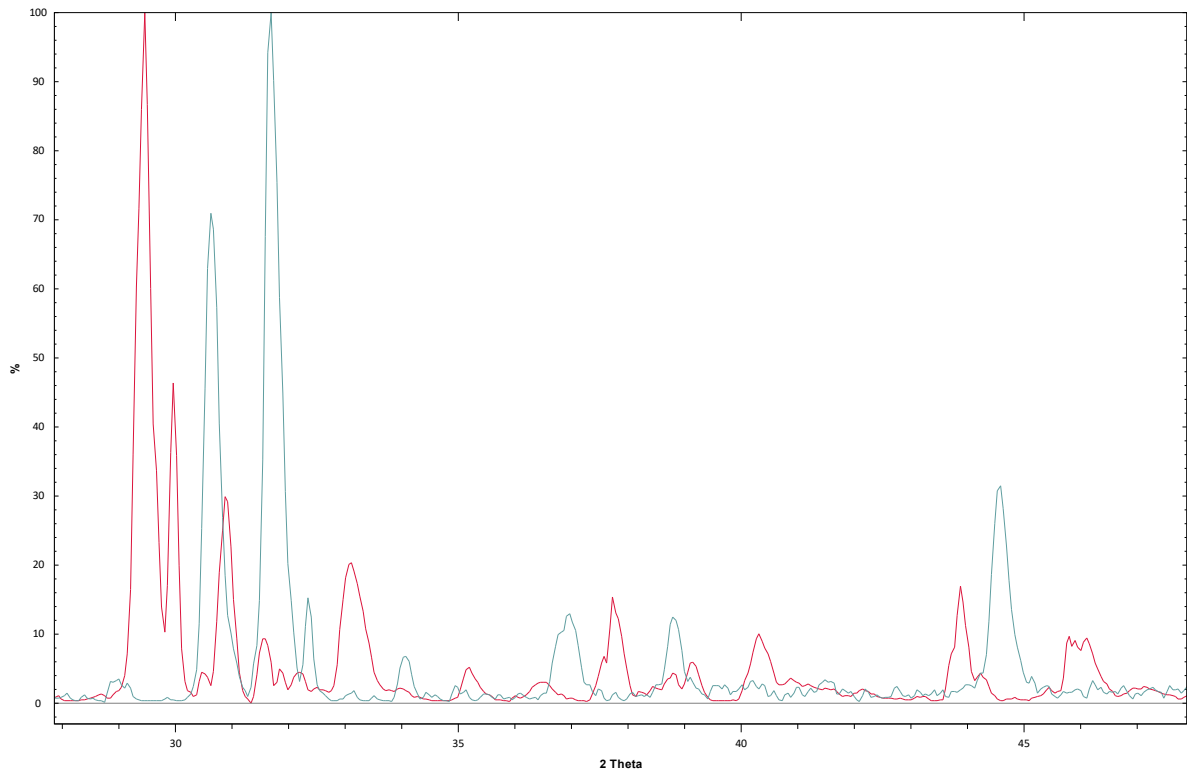

Graph A.50: Expansion of PXR overlay of oxidized silica **SSA-3** (red) and oxidized silica-DNPH **SSA-4** (blue)

**SSA-3 and SSA-5**

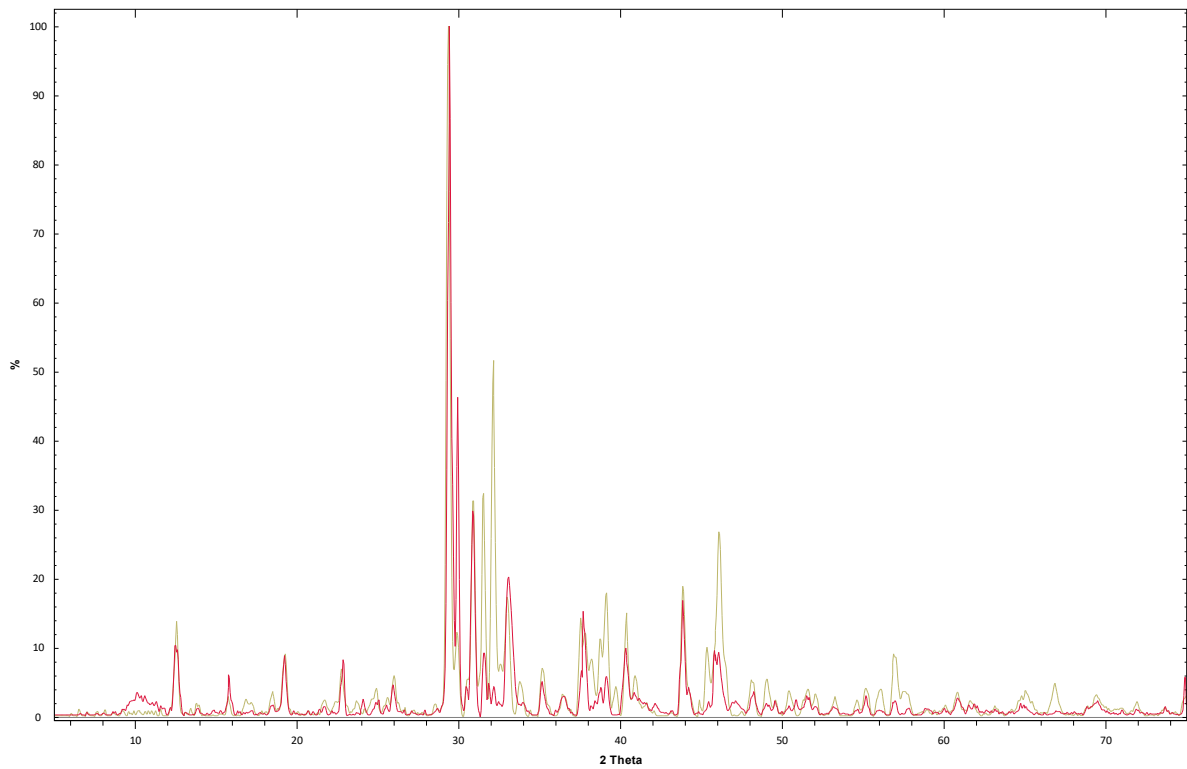

Graph A.51: PXR overlay of oxidized silica **SSA-3** (red) and oxidized silica-benzylated **SSA-5** (green)

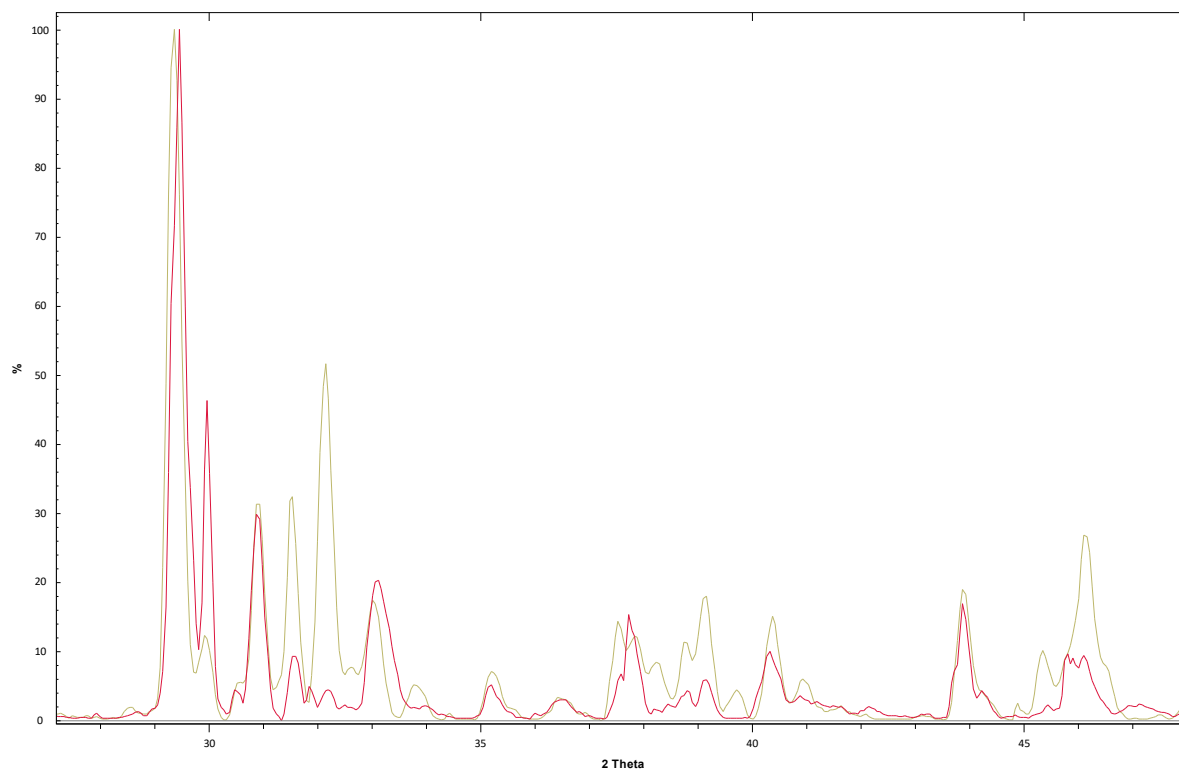

Graph A.52: Expansion of PXRD overlay of oxidized silica **SSA-3** (red) and oxidized silica-benzylated **SSA-5** (green)

SSA-3, SSA-4 and SSA-5

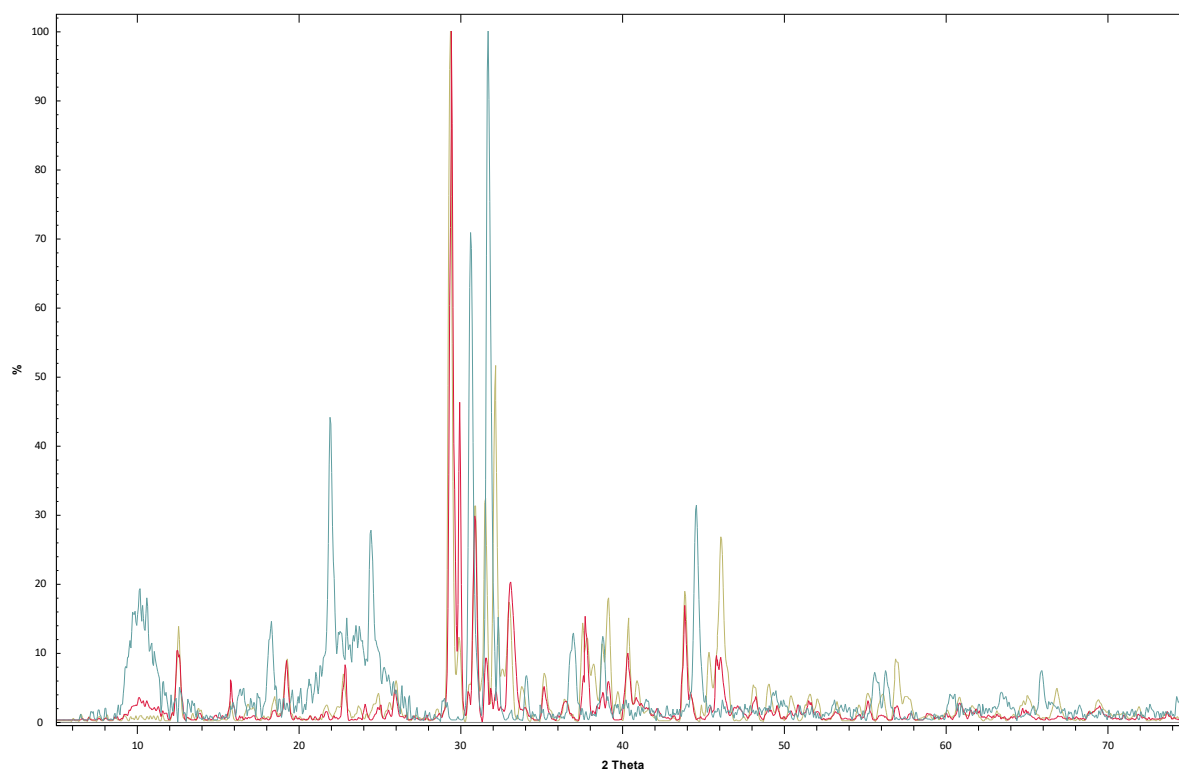

Graph A.53: PXRD overlay of oxidized silica **SSA-3** (red), oxidized silica-DNPH **SSA-4** (blue) and oxidized silica-benzylated **SSA-5** (green)

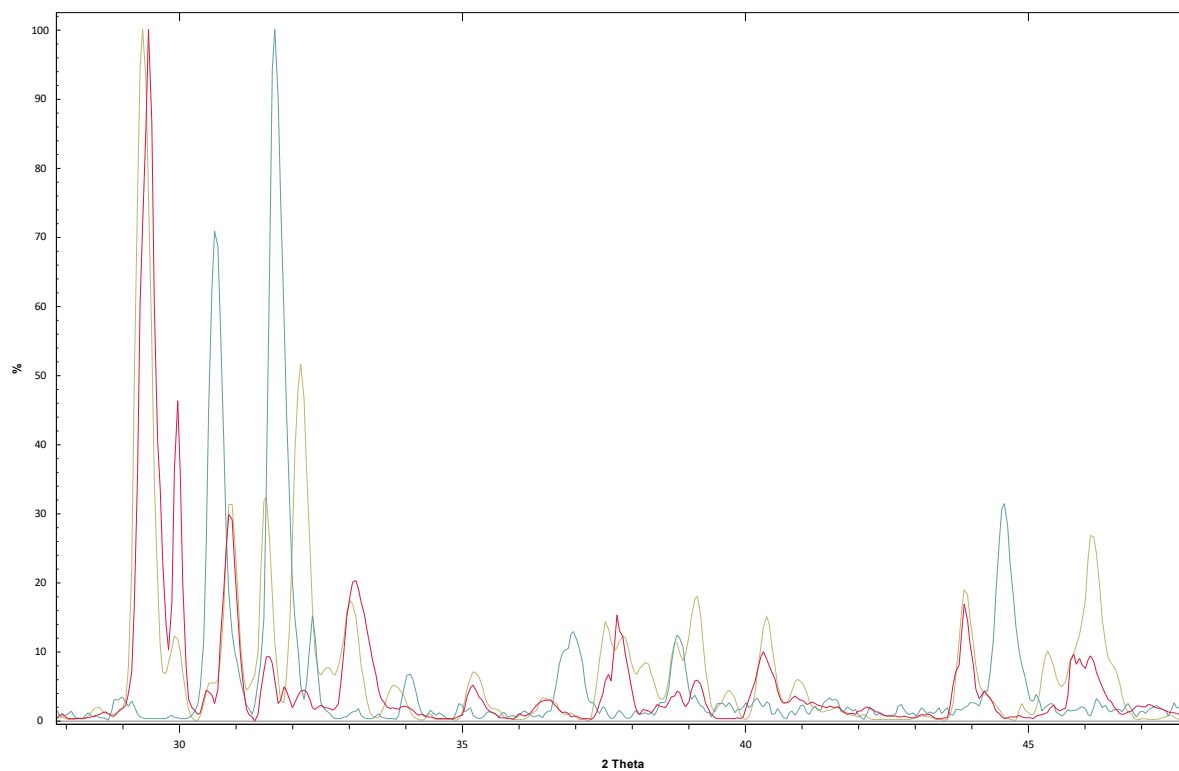

Graph A.54: Expansion of PXR overlay of oxidized silica **SSA-3** (red), oxidized silica-DNPH **SSA-4** (blue) and oxidized silica-benzylated **SSA-5** (green)

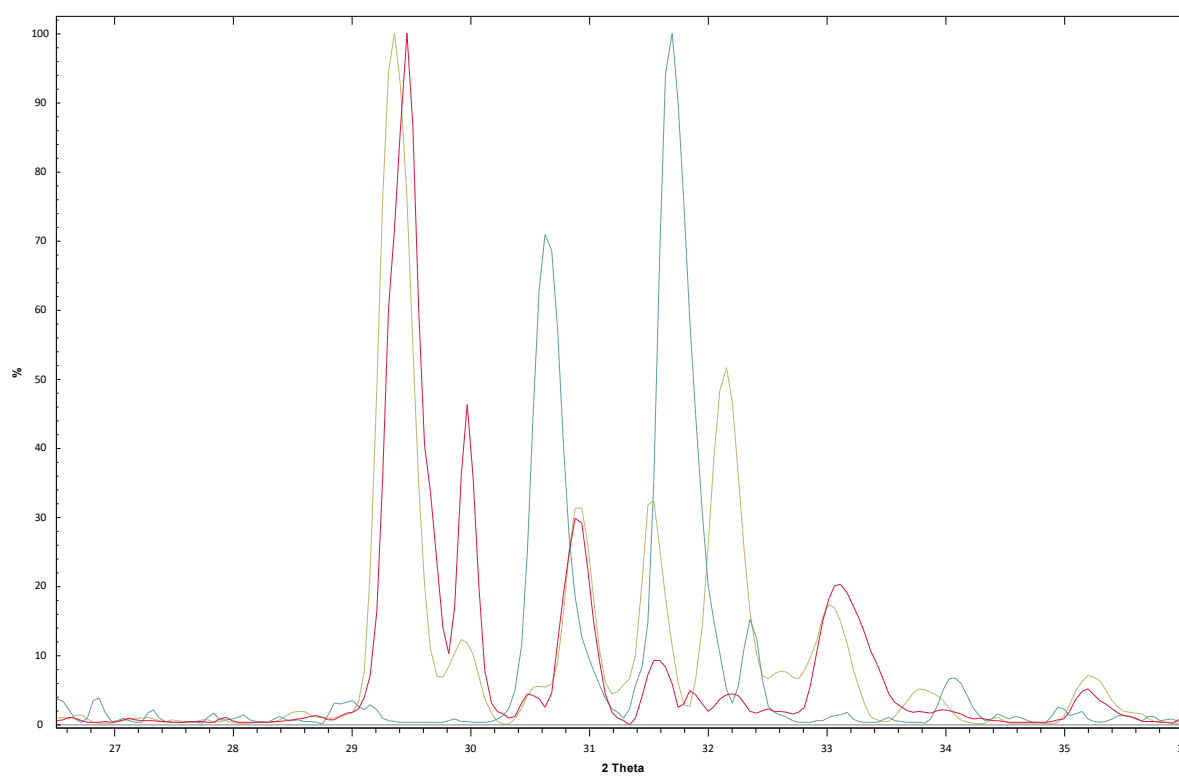

Graph A.55: Expansion of PXR overlay of oxidized silica **SSA-3** (red), oxidized silica-DNPH **SSA-4** (blue) and oxidized silica-benzylated **SSA-5** (green)

## SSA-4 and SSA-5

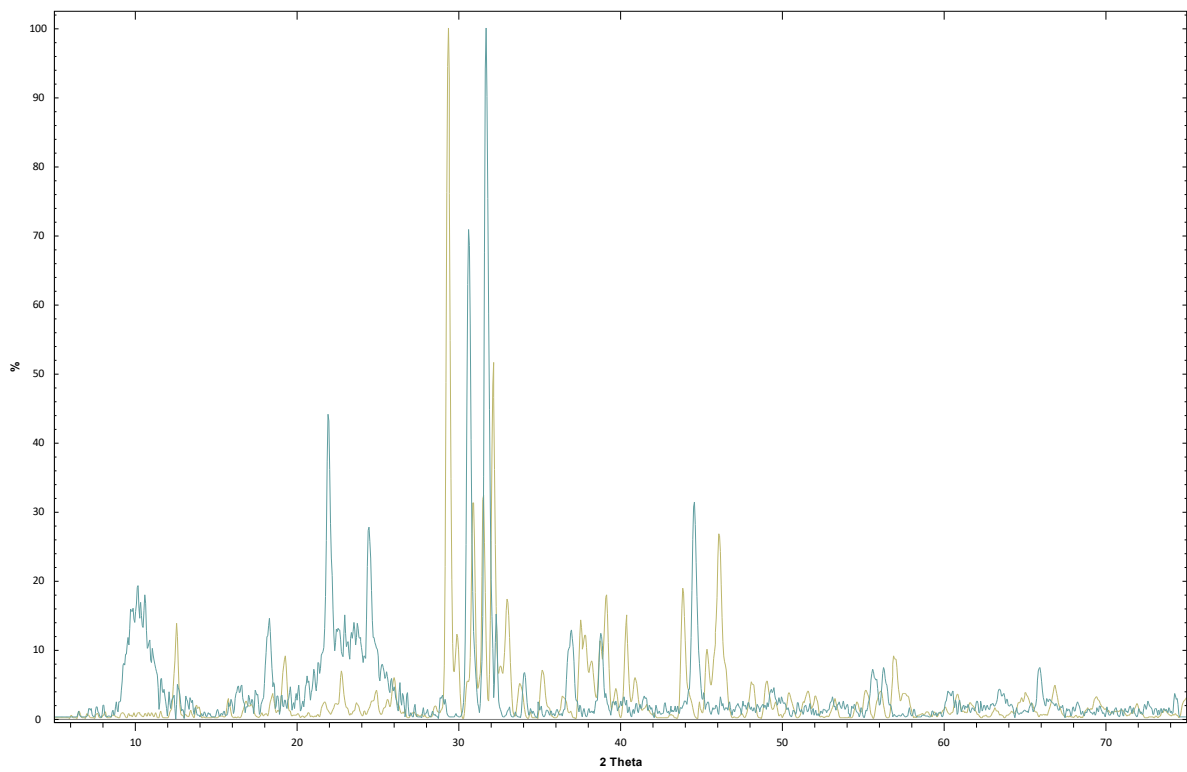

Graph A.56: PXRD overlay of oxidized silica-DNPH SSA-4 (blue) and oxidized silica-benzylated SSA-5 (green)

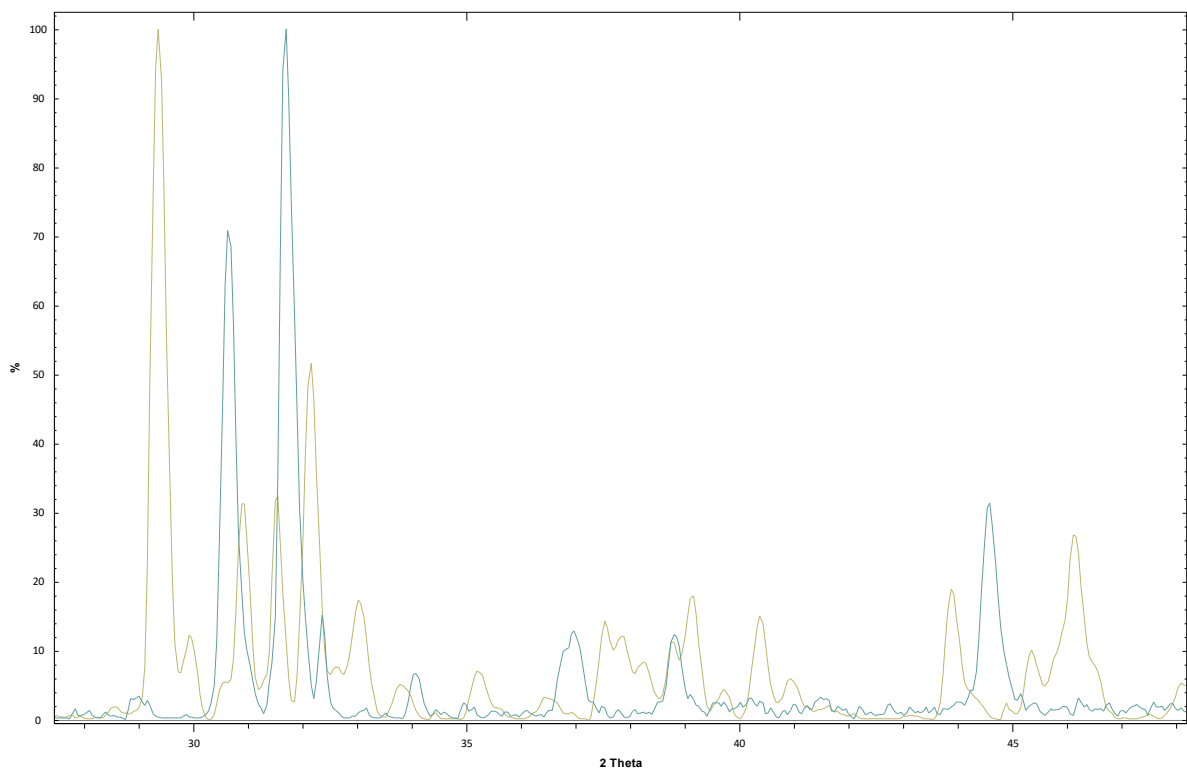

Graph A.57: Expansion of PXRD overlay of oxidized silica-DNPH SSA-4 (blue) and oxidized silica-benzylated SSA-5 (green)

## SSA-5 and SSA-6

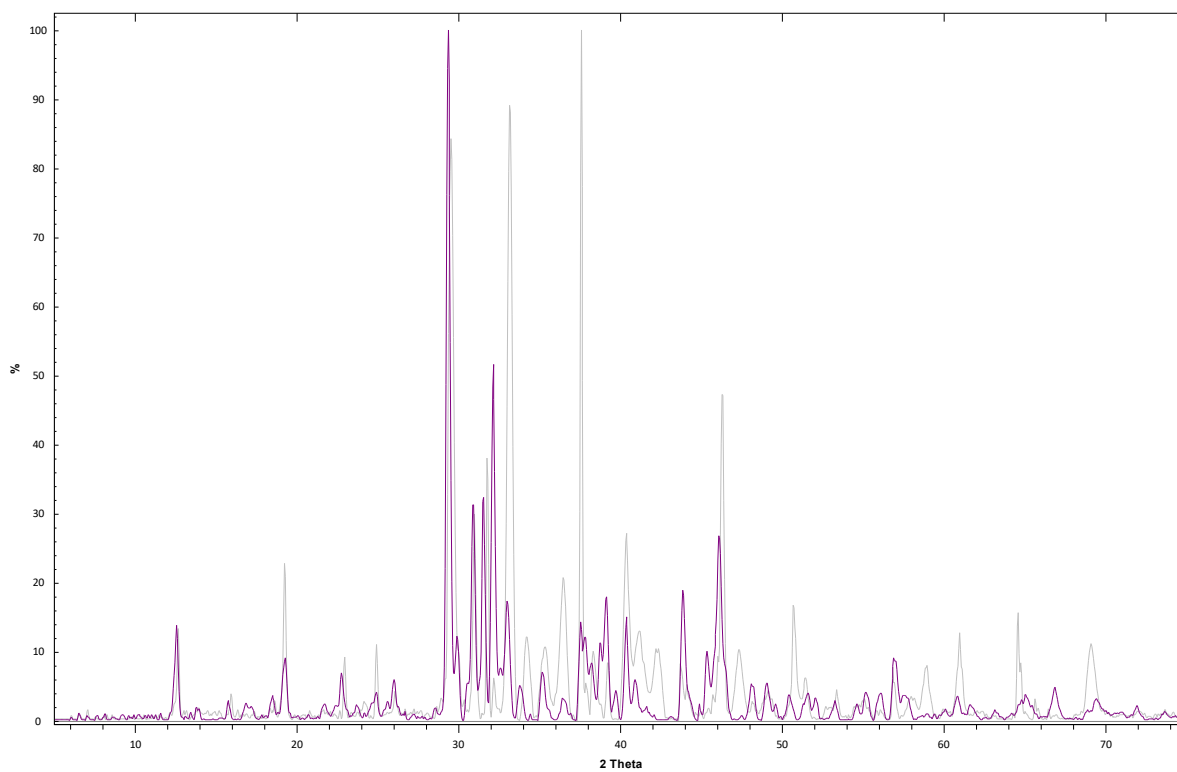

Graph A.58: PXR overlay of silica-benzylated SSA-6 (grey) and oxidized silica-benzylated SSA-5 (purple)

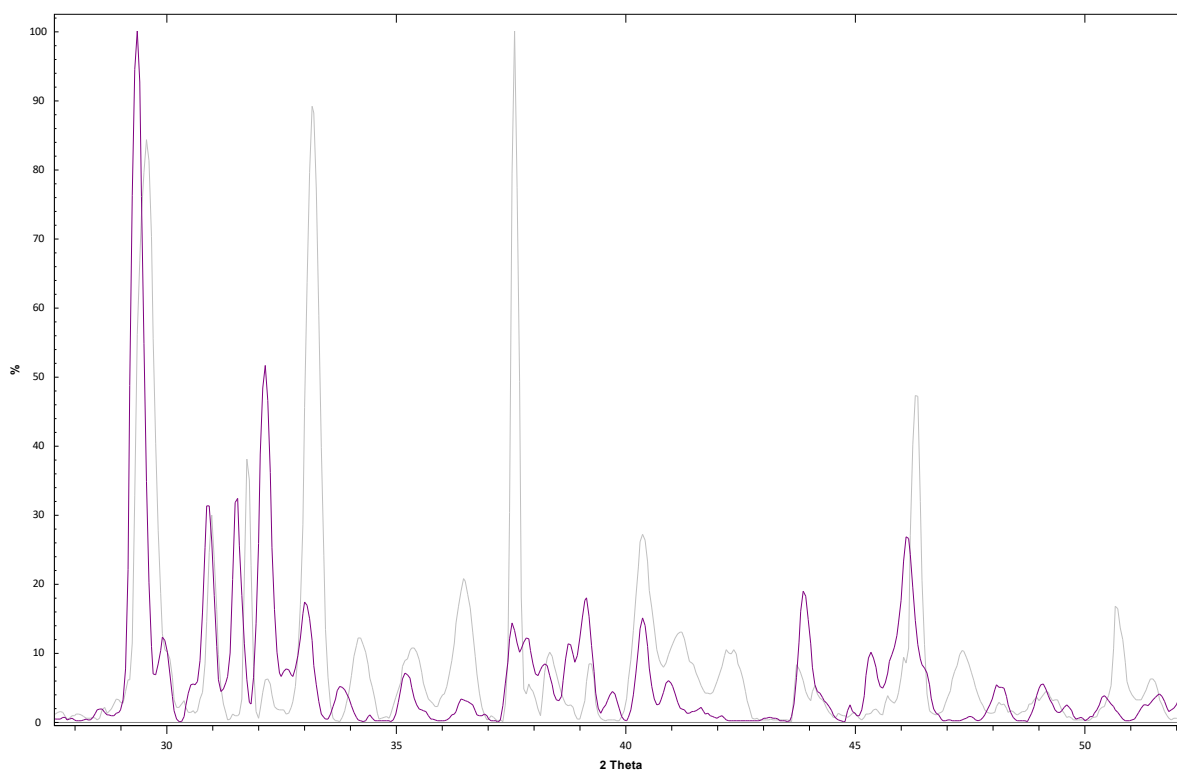

Graph A.59: Expansion of PXR overlay of silica-benzylated SSA-6 (grey) and oxidized silica-benzylated SSA-5 (purple)

*SSA-6 and Silica*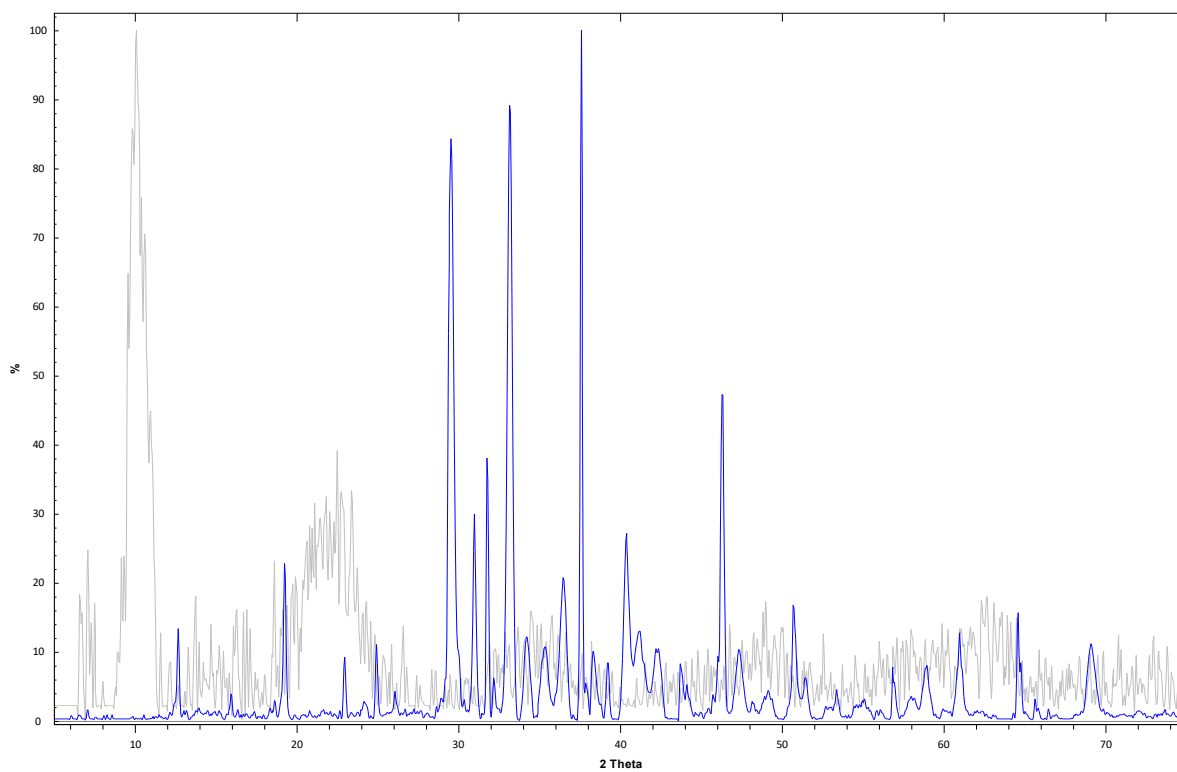

Graph A.60: PXRD overlay of silica-benzylated **SSA-6** (blue) and silica (grey)

*Silica, SSA-6 and SSA-7*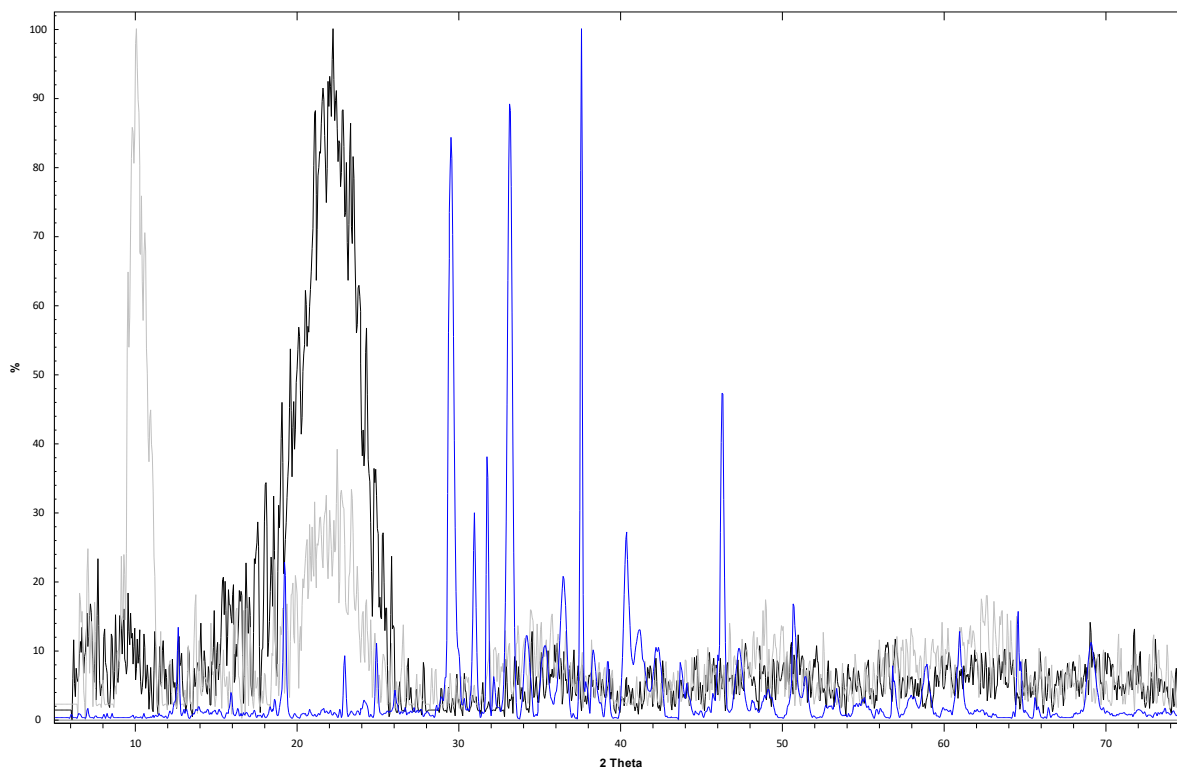

Graph A.61: PXRD overlay of silica-benzylated **SSA-6** (blue), silica-DNPH **SSA-7** (black) and silica (grey)

## SSA-6 and SSA-7

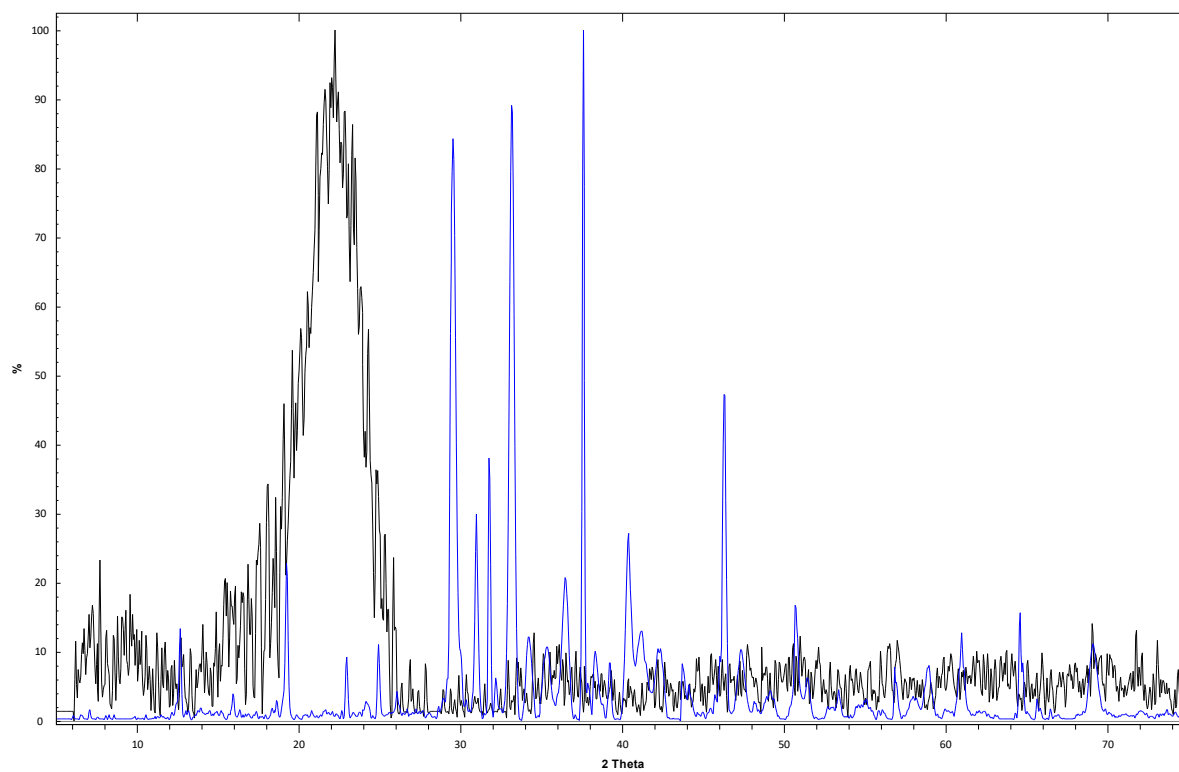

Graph A.62: PXRD overlay of silica-benzylated SSA-6 (blue) and silica-DNPH SSA-7 (black)

## SSA-4 and SSA-7

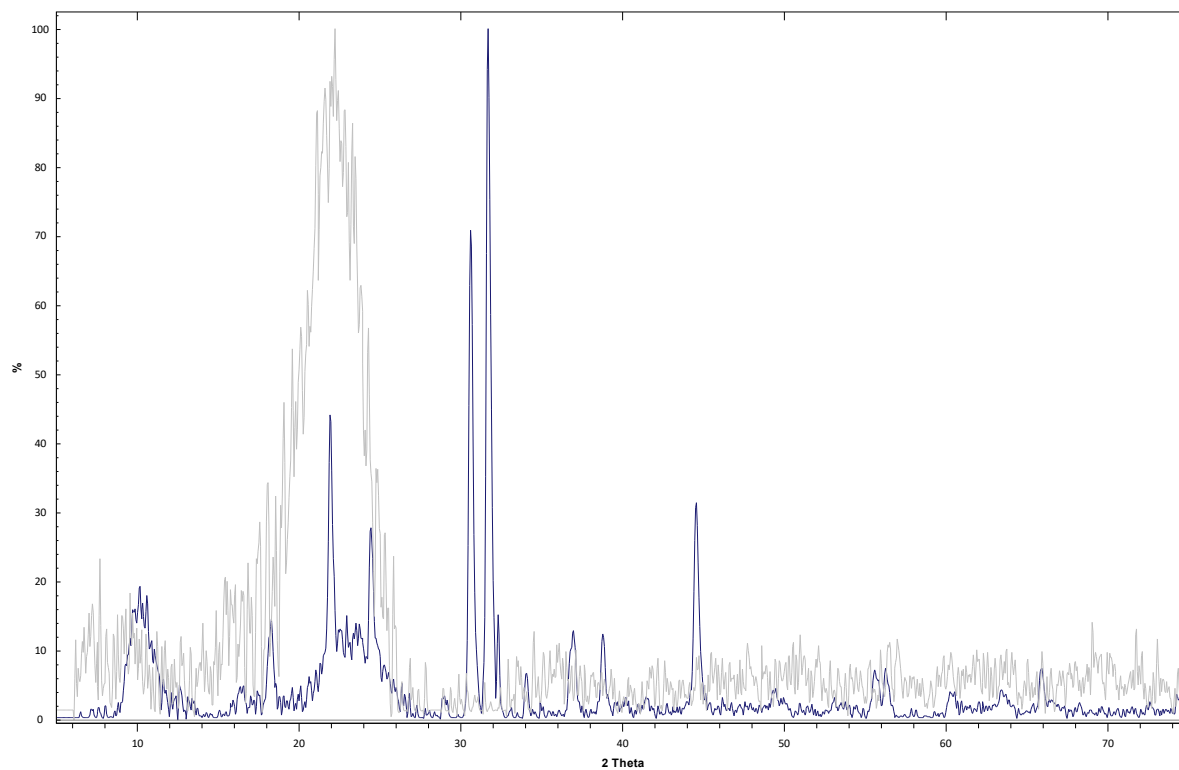

Graph A.63: PXRD overlay of silica-DNP SSA-7 (grey) and oxidized silica-DNPH SSA-4 (navy)

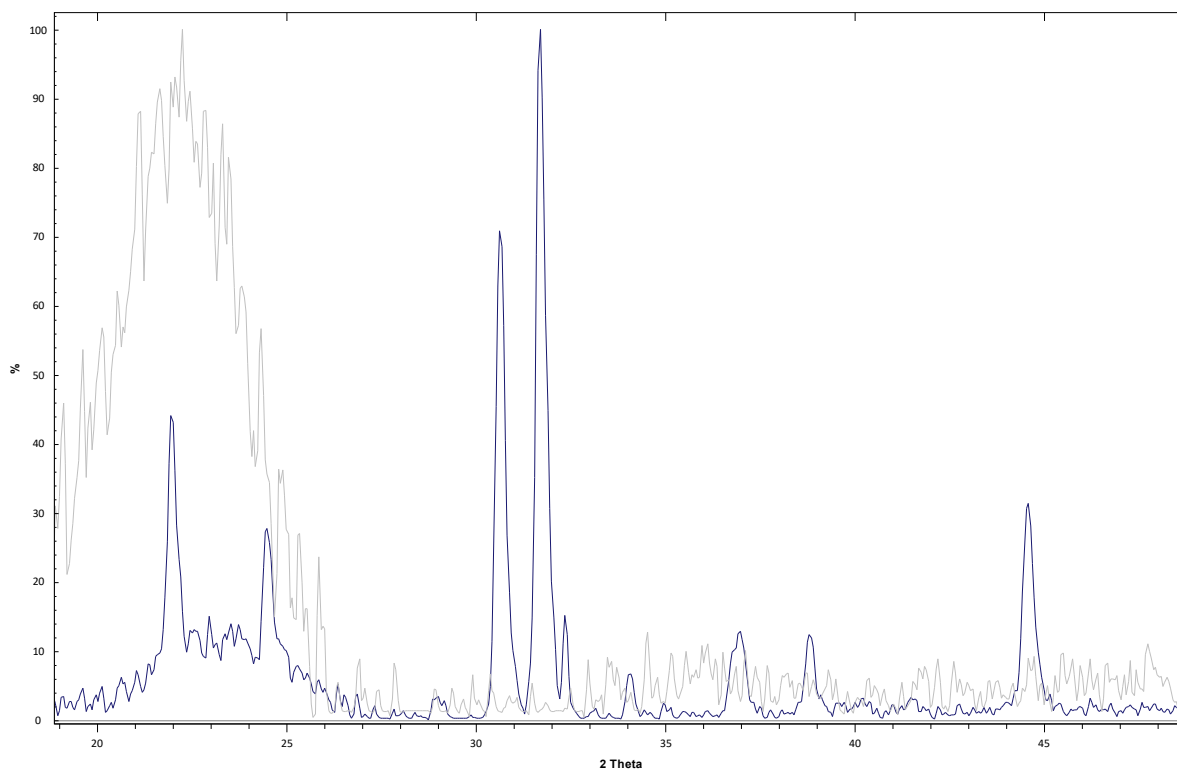

Graph A.64: Expansion of PXRD overlay of silica-DNPH **SSA-7** (grey) and oxidized silica-DNP **SSA-4** (navy)

### A-5 SEM results

#### A-5.1 Silica

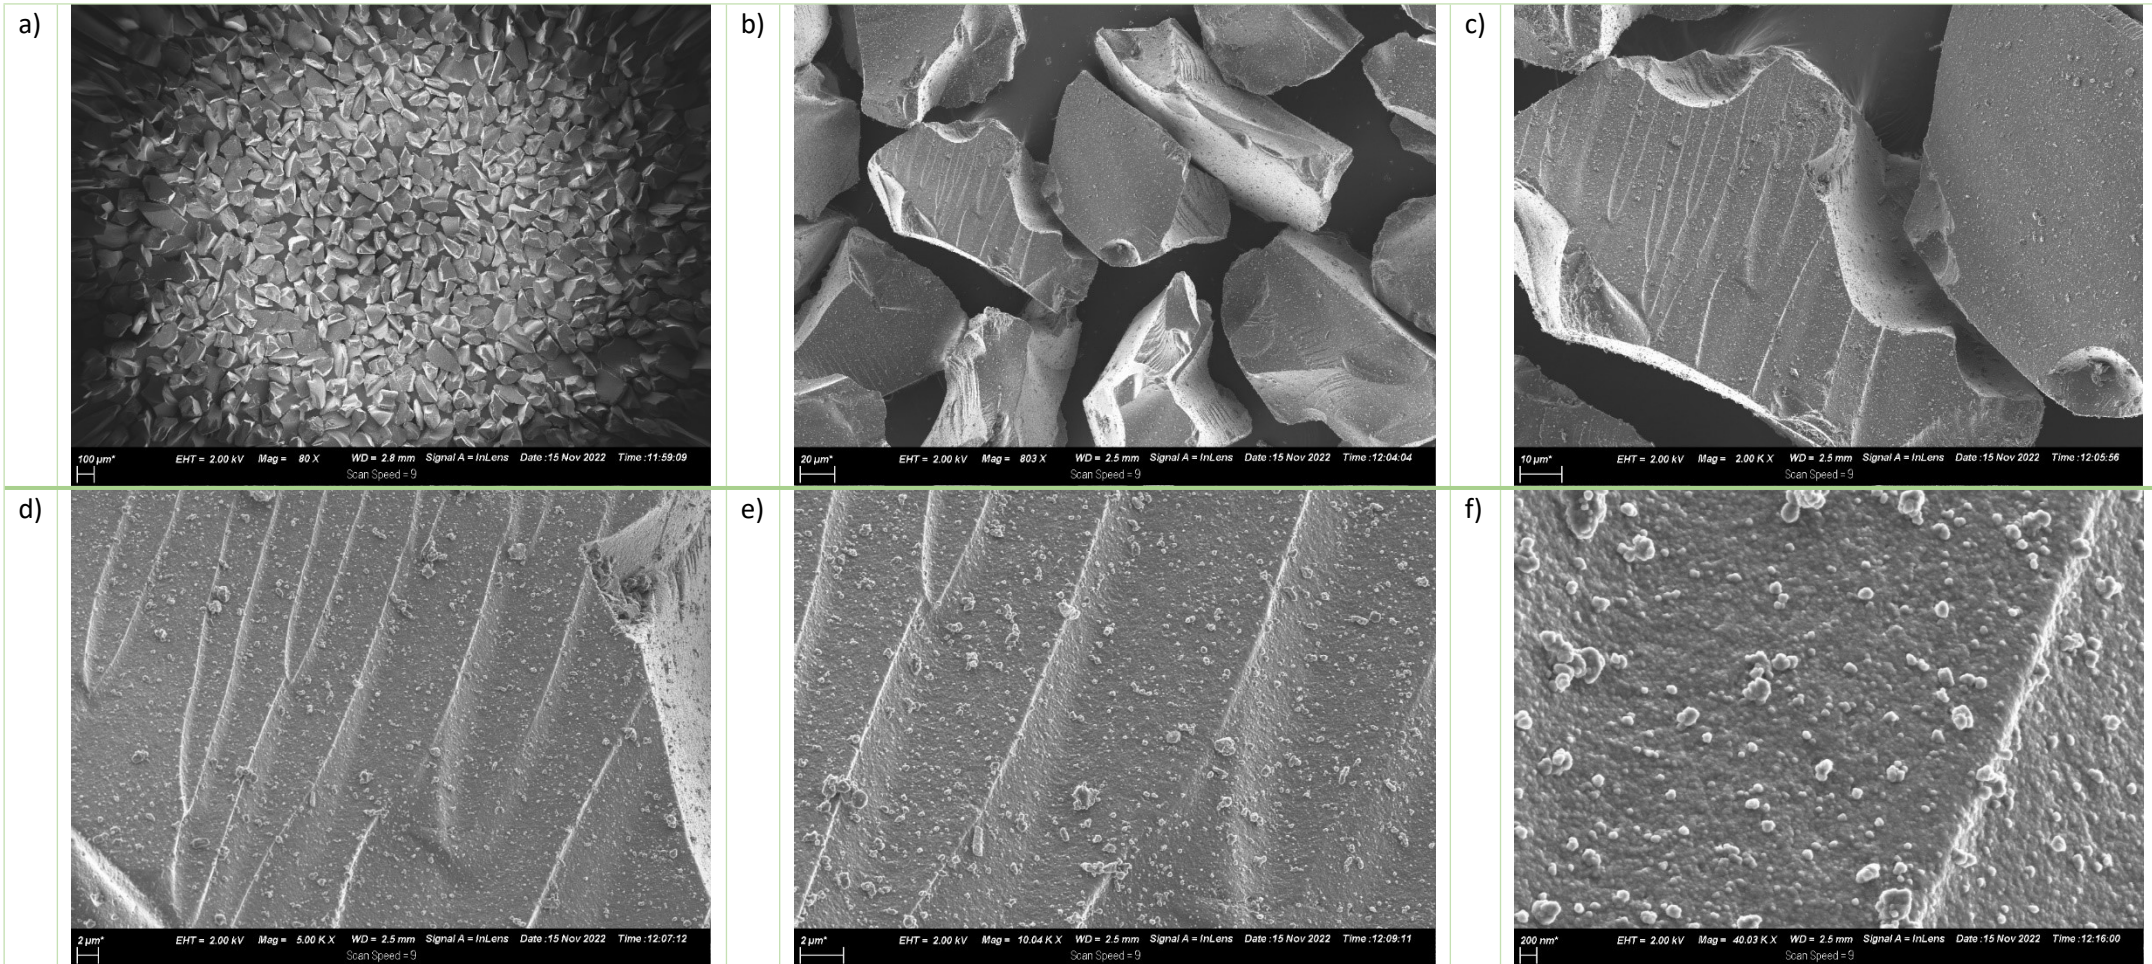

Figure A.2: Various SEM magnifications of Silica

A-5.2 SSA-3

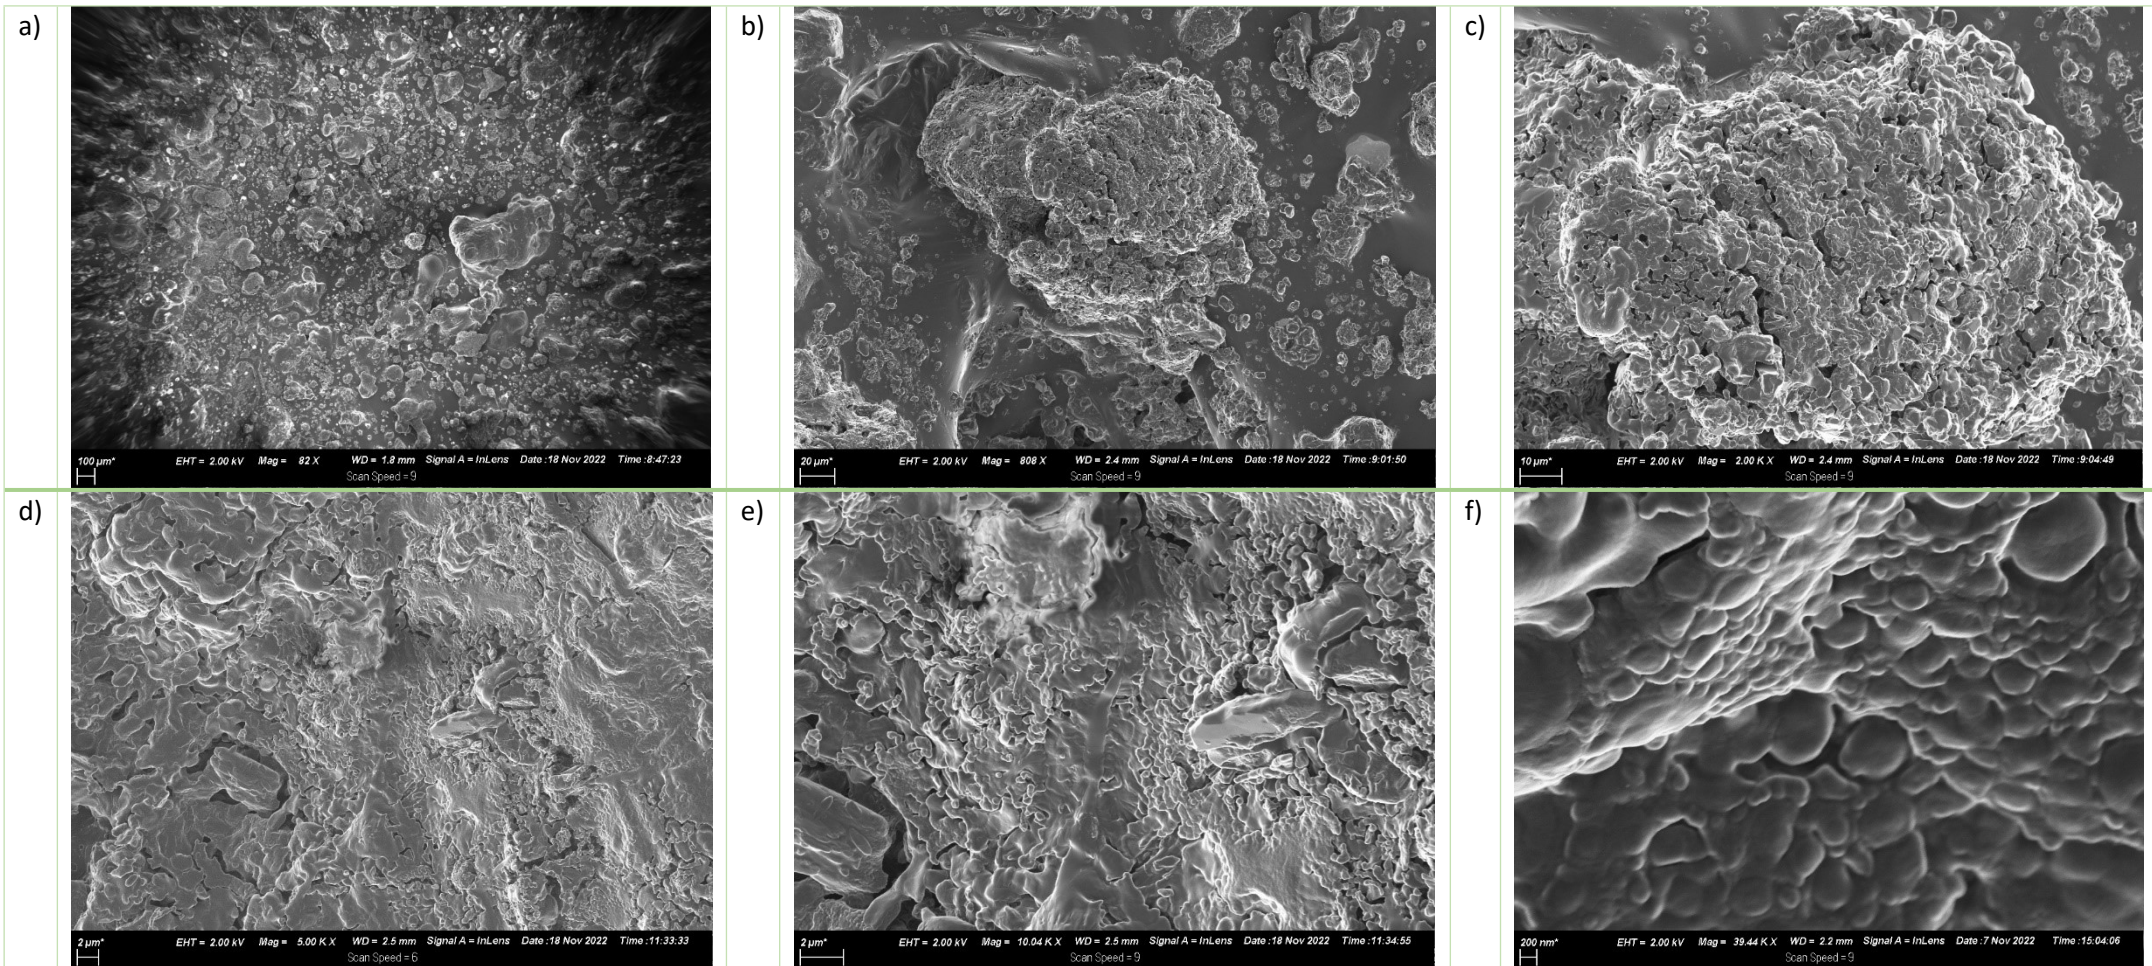

Figure A.3: Various SEM magnifications of SSA-3

A-5.3 SSA-4

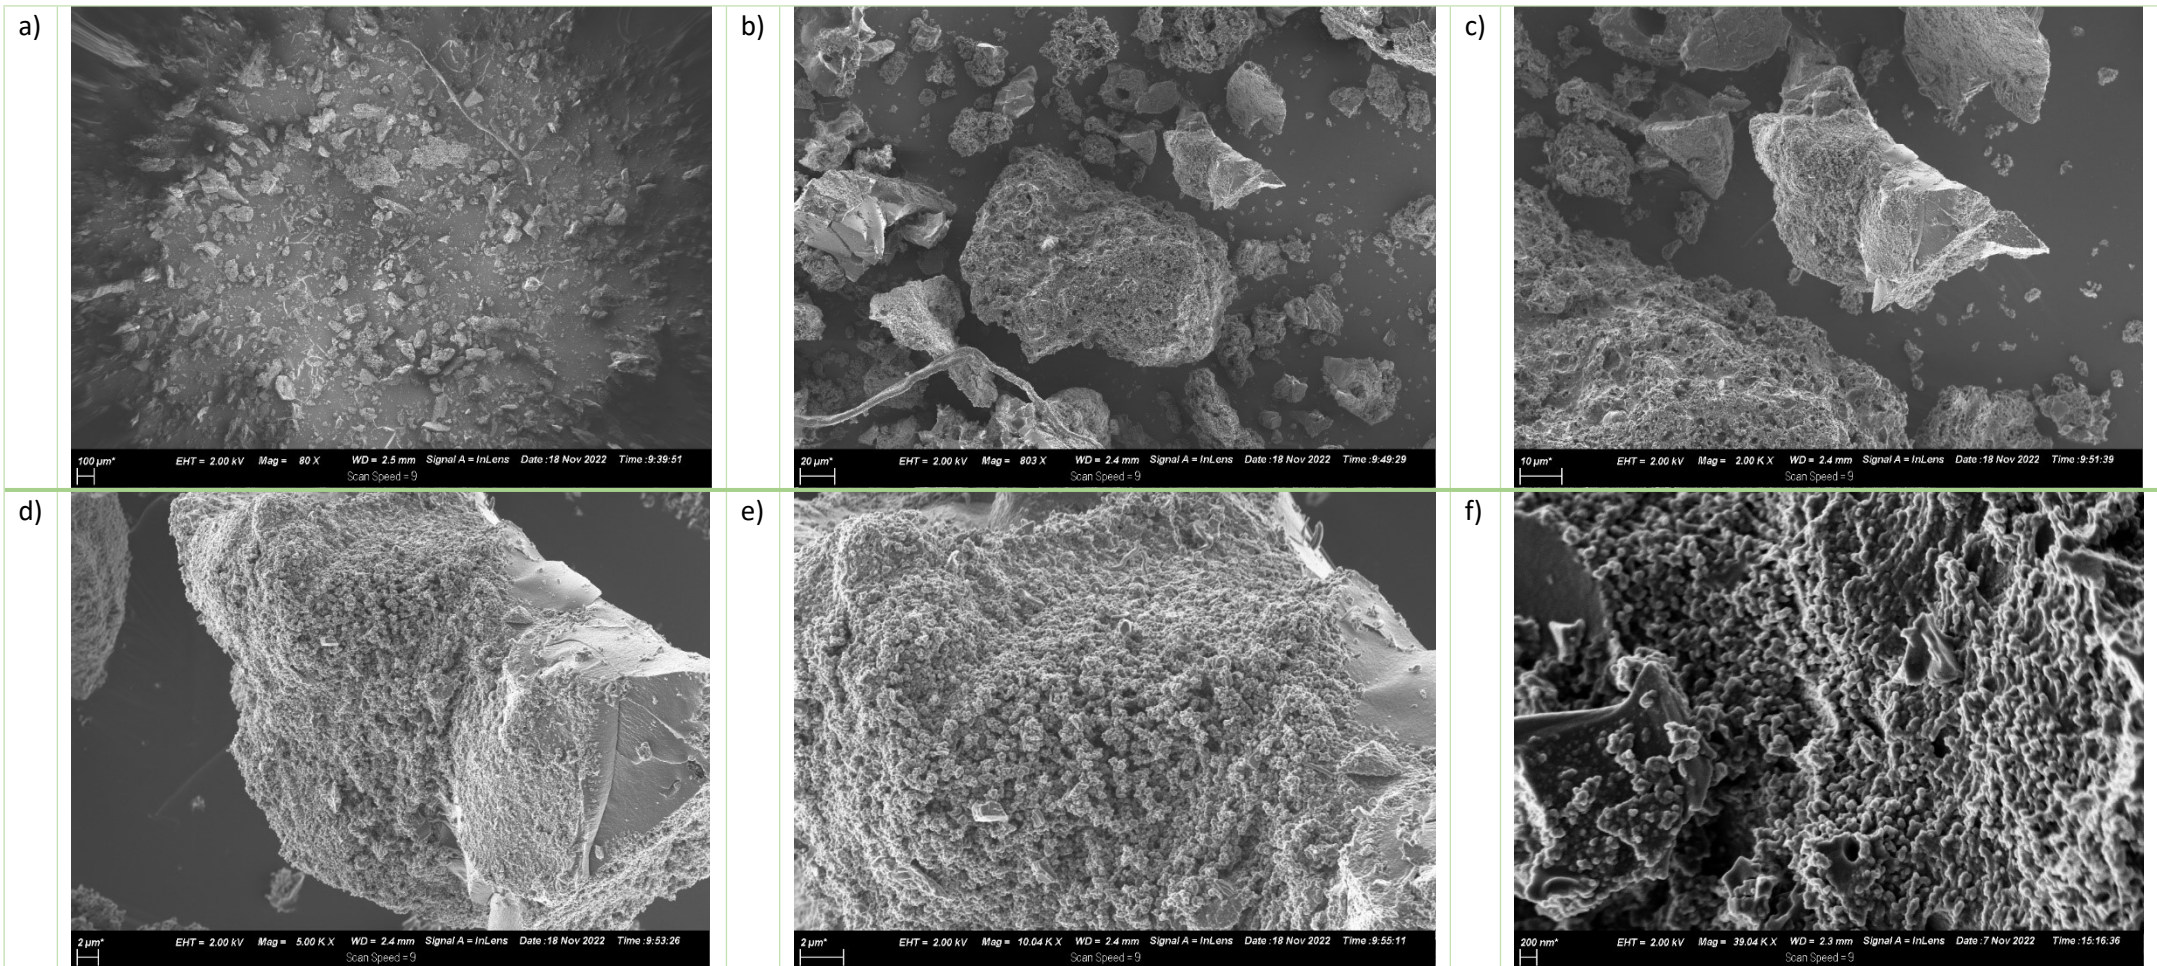

Figure A.4: Various SEM magnifications of SSA-4

A-5.4 SSA-5

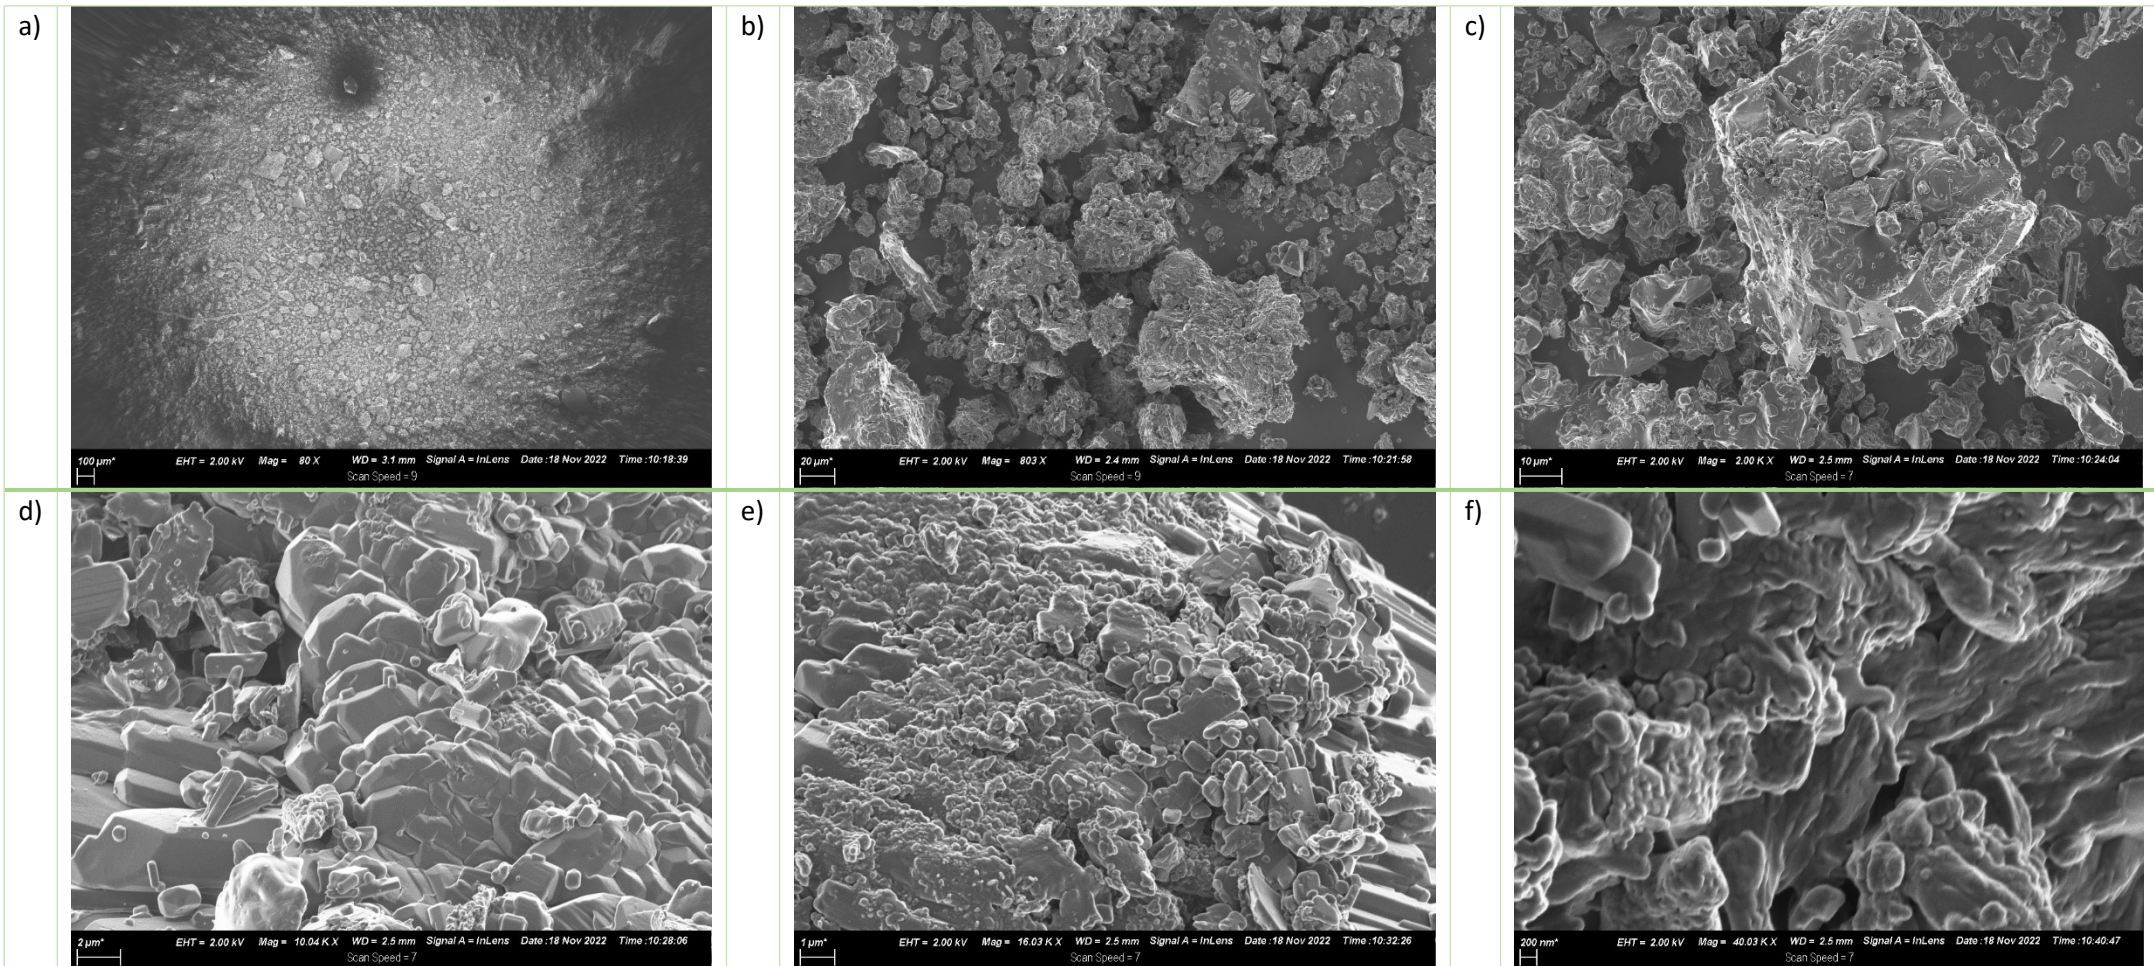

Figure A.5: Various SEM magnifications of SSA-5

A-5.5 SSA-6

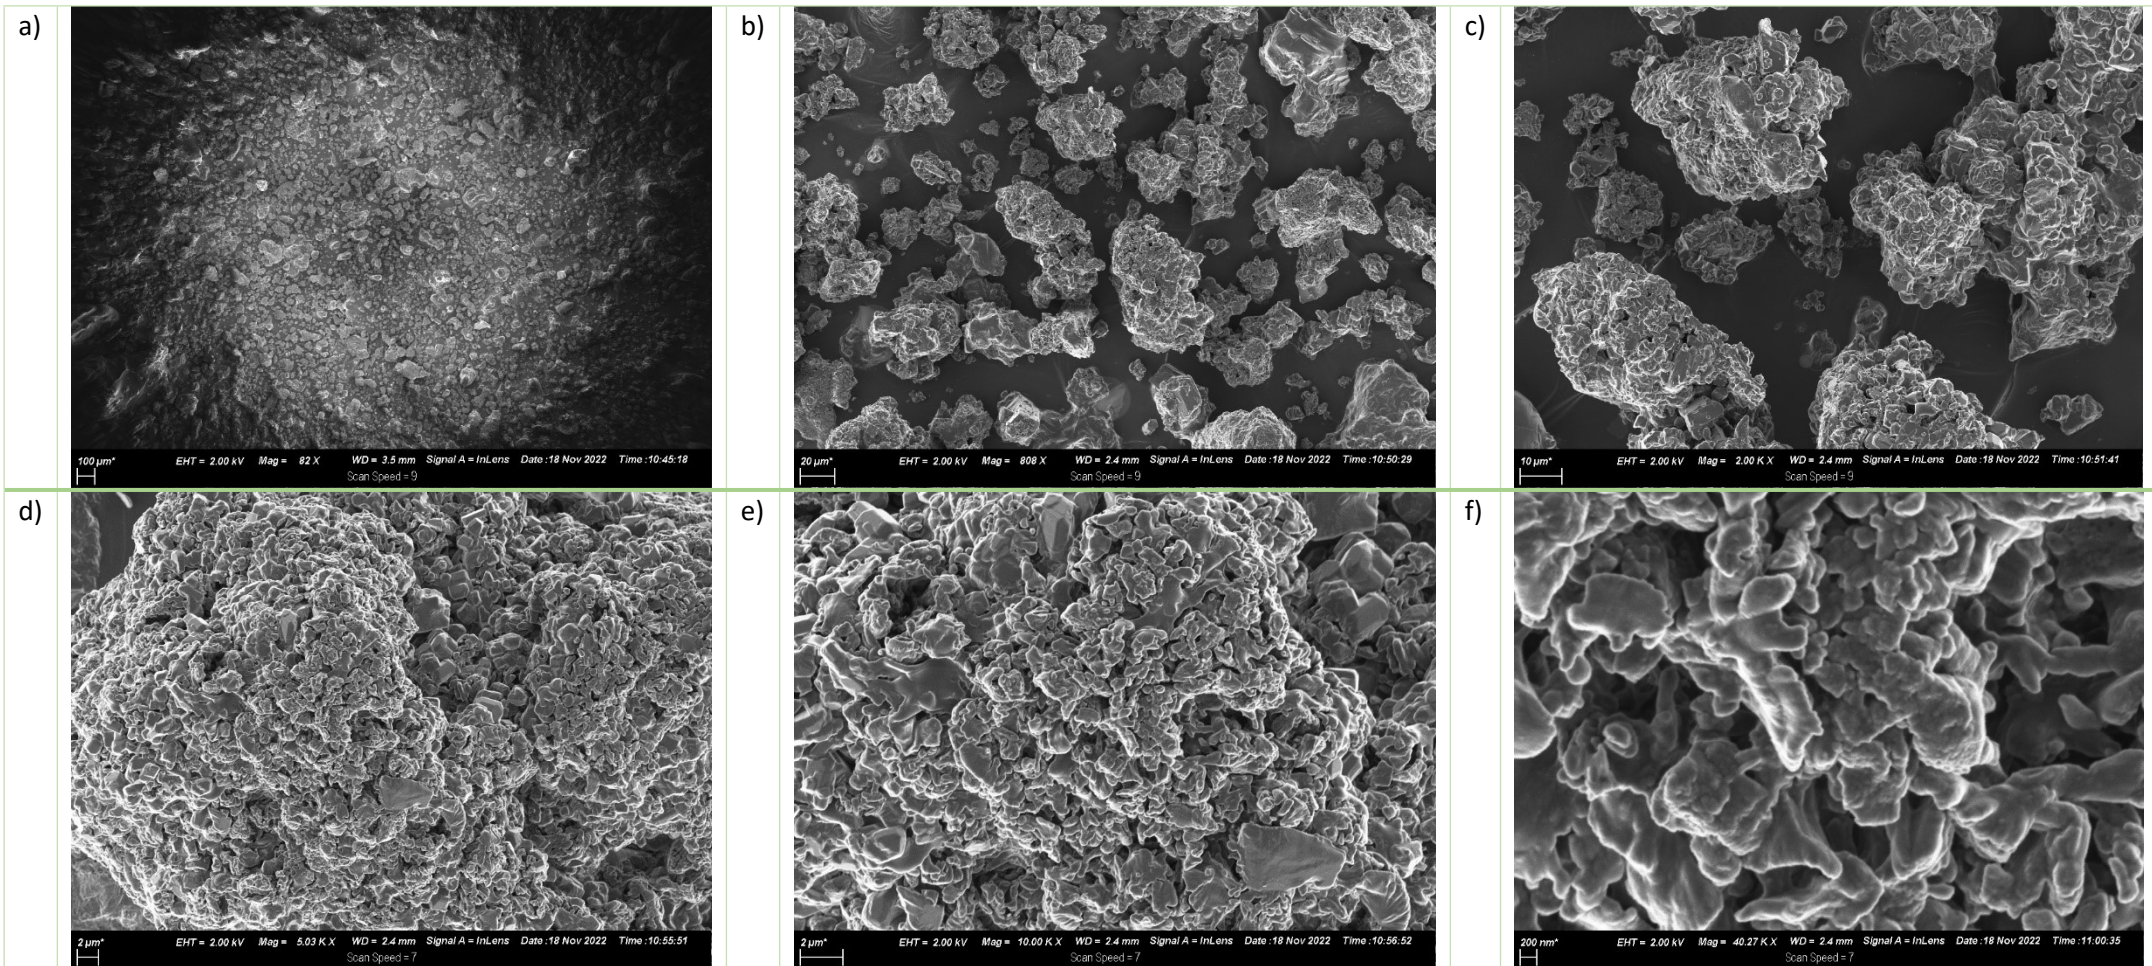

Figure A.6: Various SEM magnifications of SSA-6

A-5.6 SSA-7

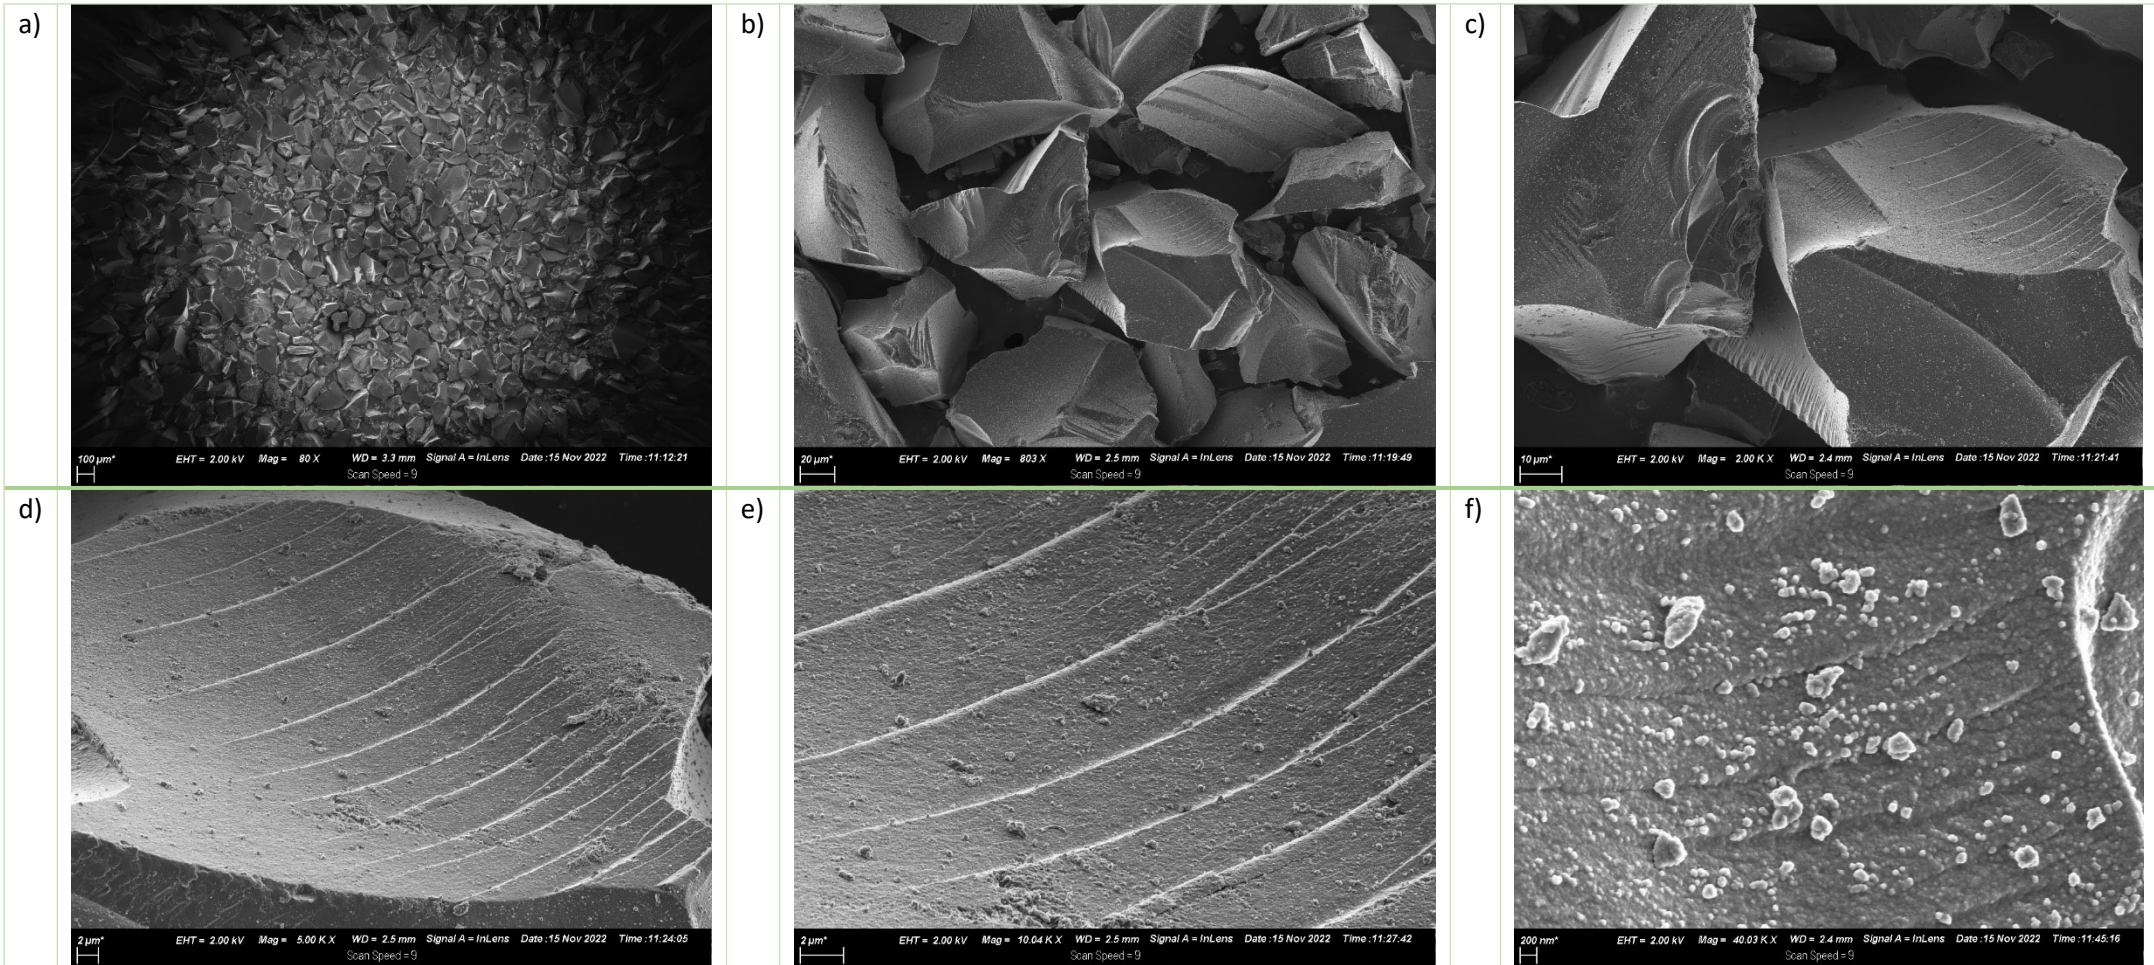

Figure A.7: Various SEM magnifications of SSA-7

## A-6 IR results

### A-6.1 Silica

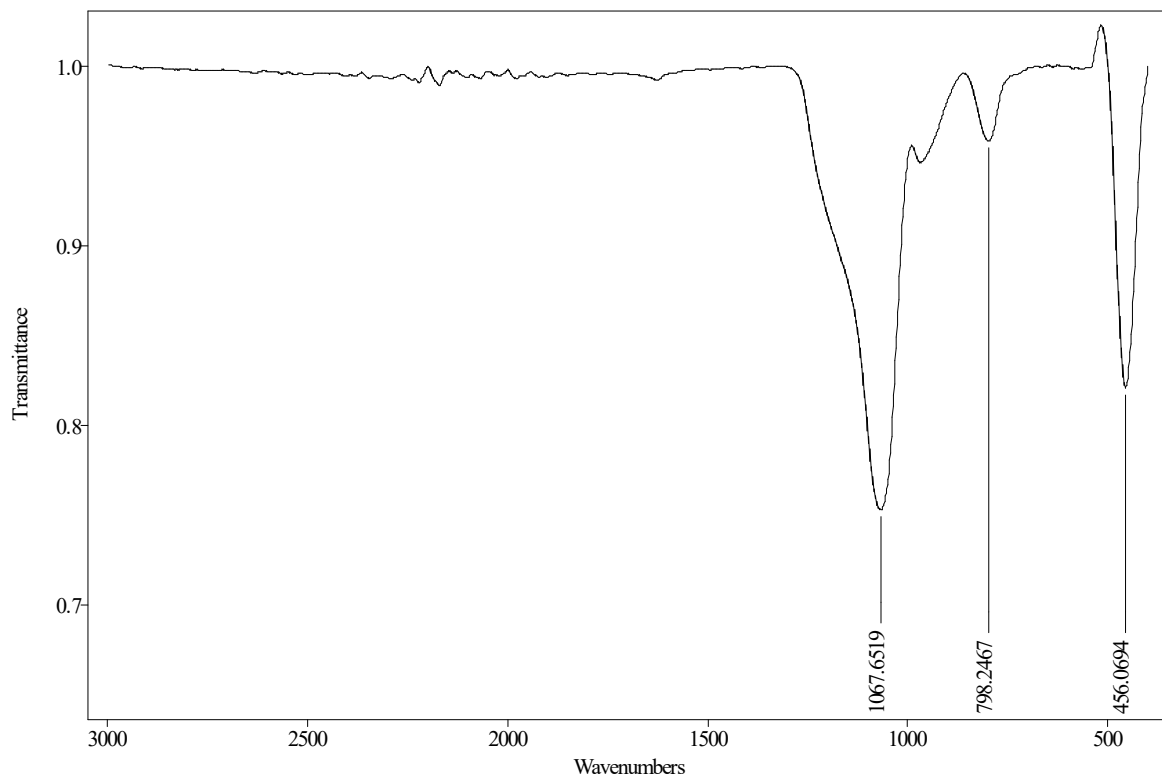

Figure A.8: FTIR spectrum of silica

### A-6.2 SSA-3

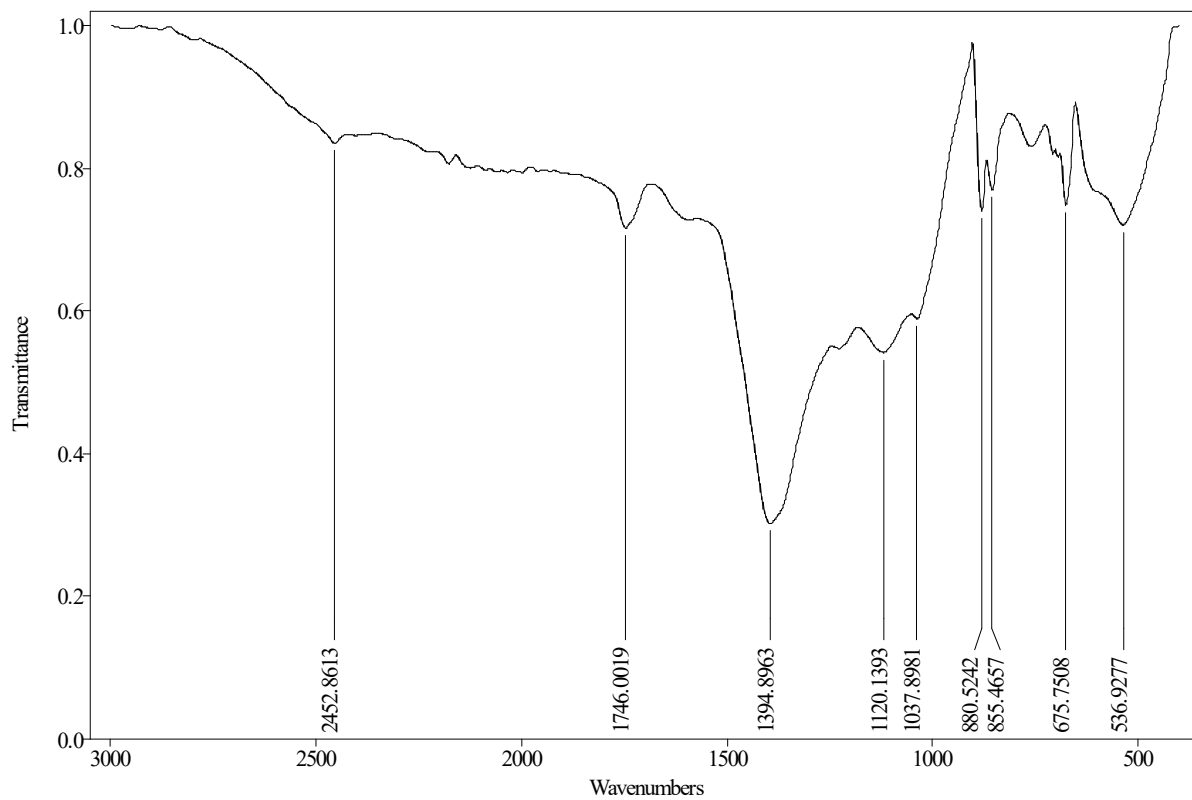

Figure A.9: FTIR spectrum of oxidized silica **SSA-3**

## A-6.3 SSA-4

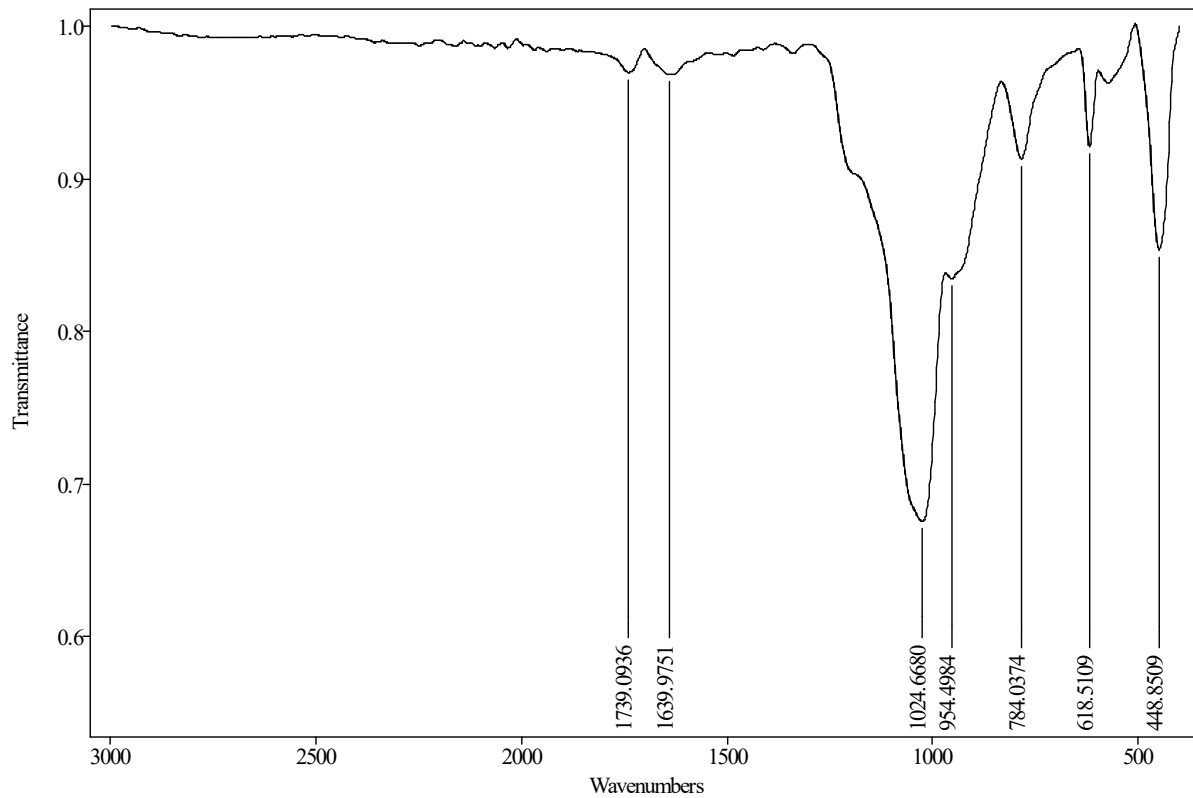

Figure A.10: FTIR spectrum of oxidized silica-DNPH **SSA-4**

## A-6.4 SSA-5

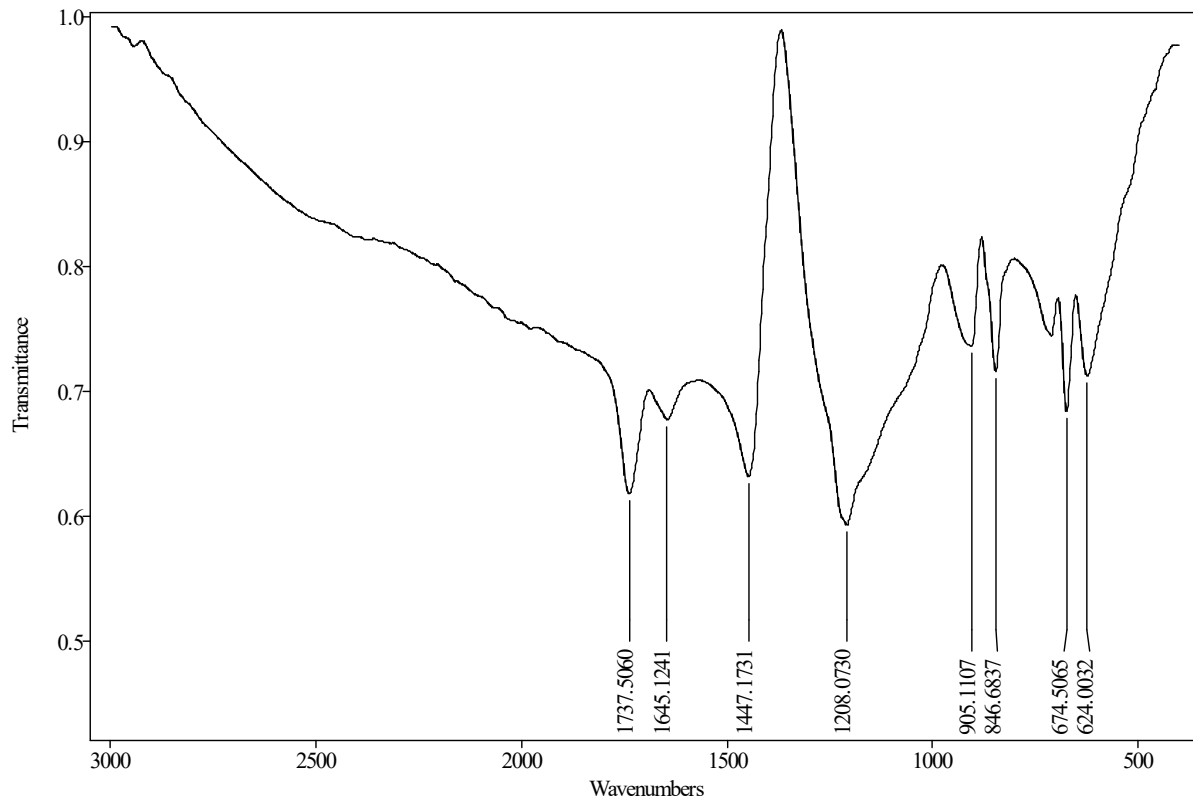

Figure A.11: FTIR spectrum of oxidized silica- benzylated **SSA-5**

## A-6.5 SSA-6

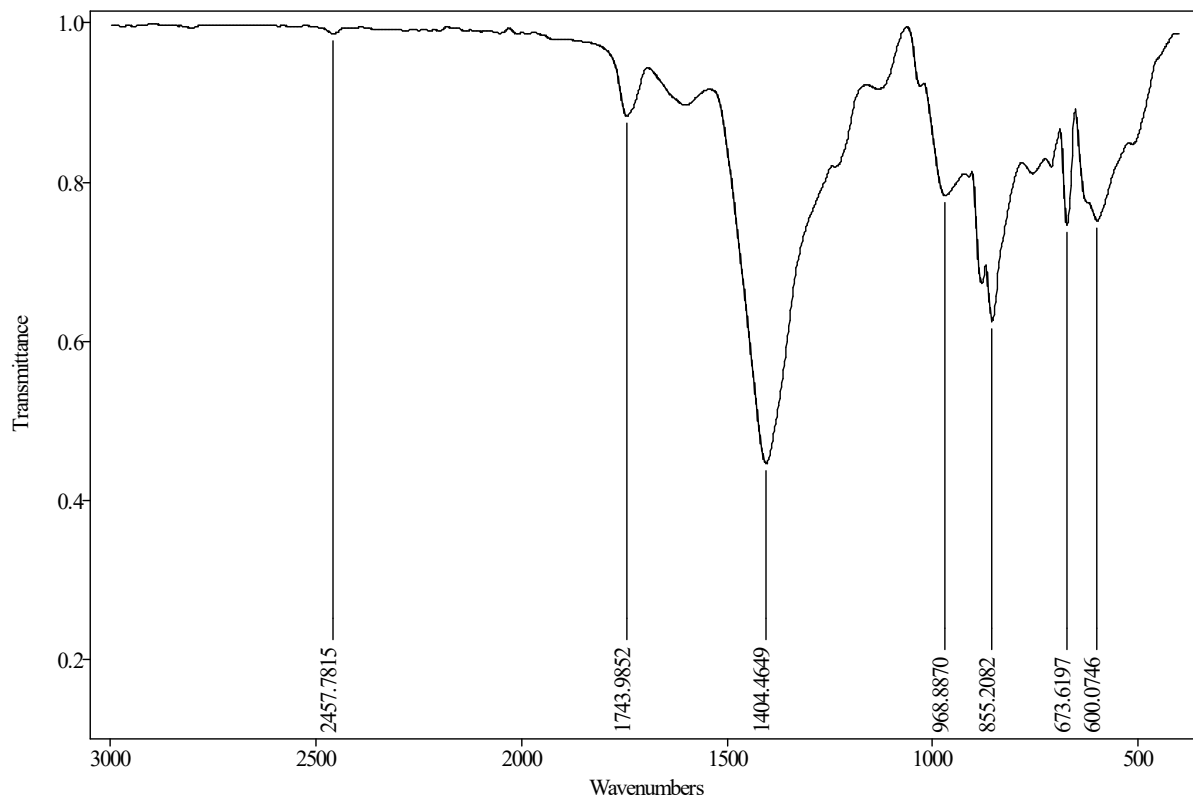

Figure A.12: FTIR spectrum of silica-benzylated SSA-6

## A-6.6 SSA-7

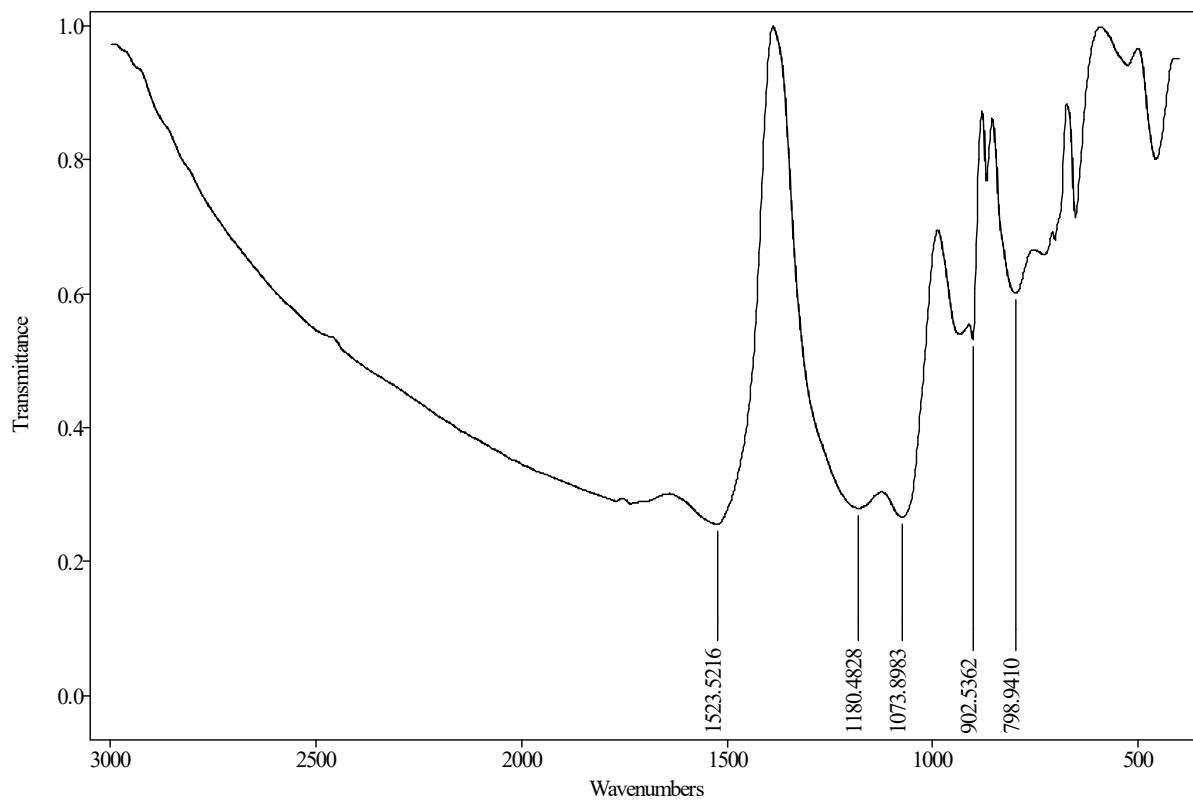

Figure A.13: FTIR spectrum of silica-DNPH SSA-7

## A-6.7 Combinations

*Silica and SSA-3*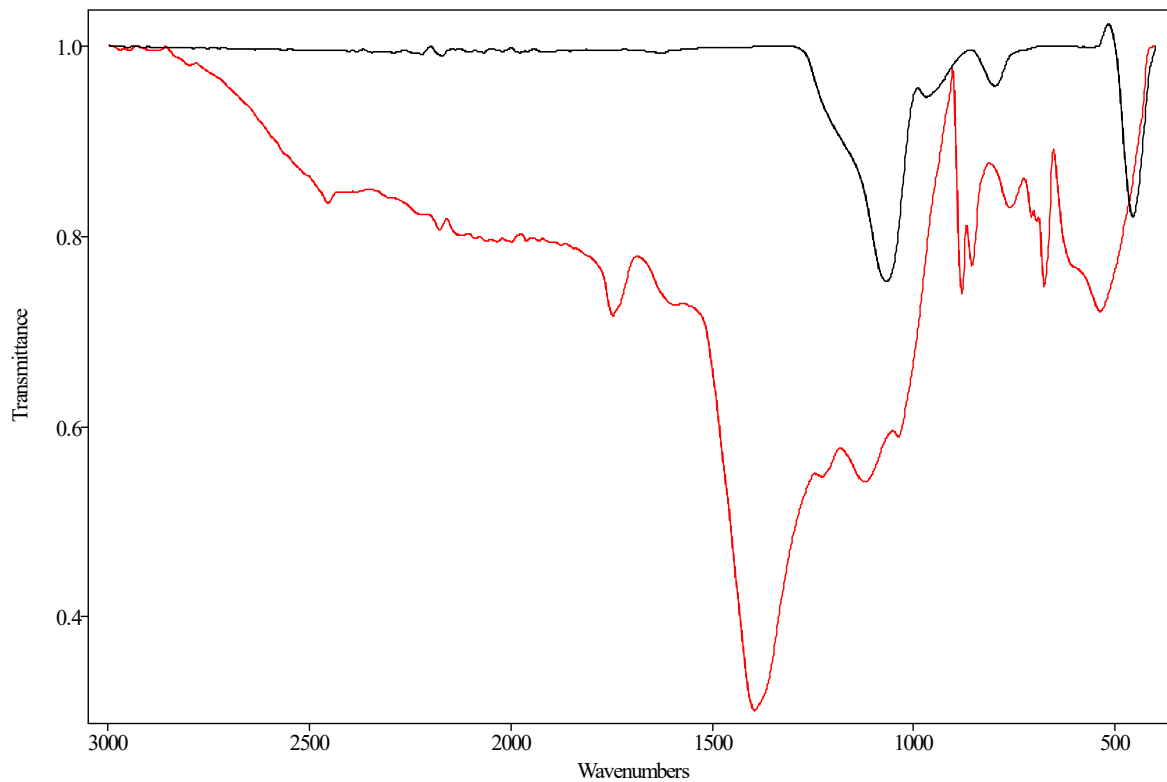

Figure A.14: FTIR overlay of silica (black) and oxidized silica SSA-3 (red)

*SSA-3 and SSA-4*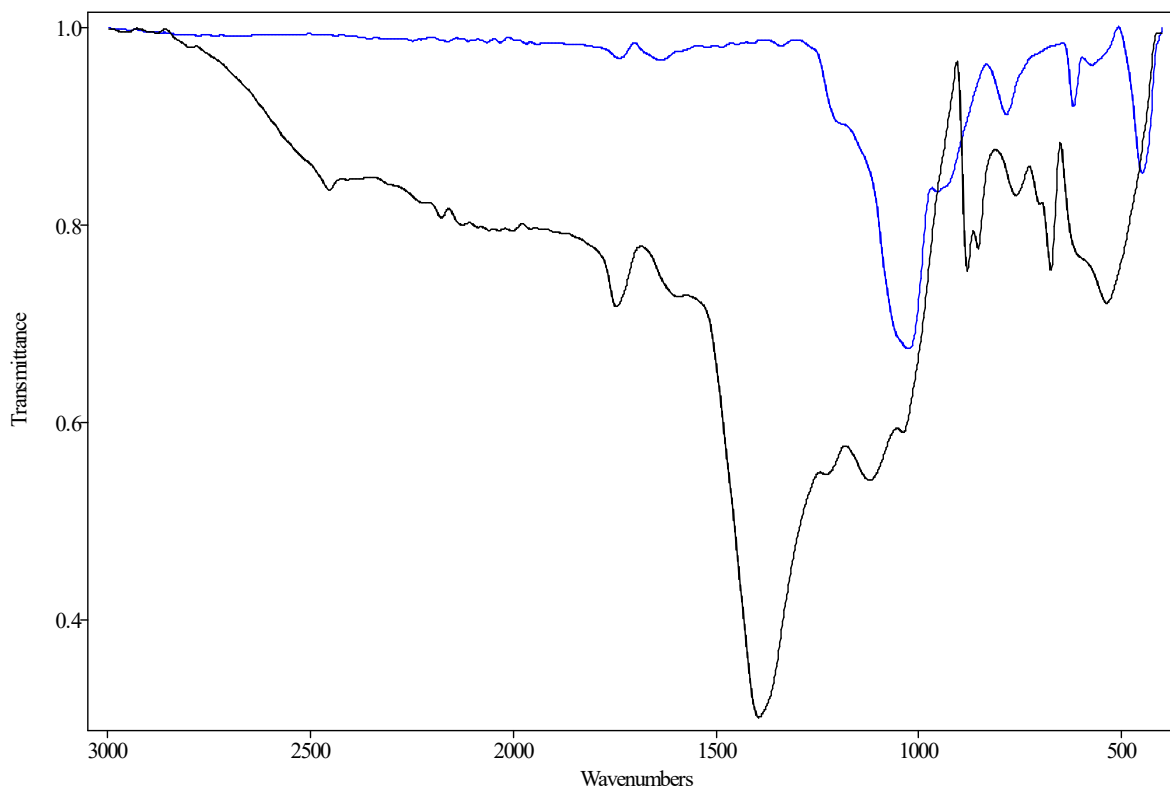

Figure A.15: FTIR overlay of oxidized silica SSA-3 (black) and oxidized silica-DNPH SSA-4 (blue)

SSA-3 and SSA-5

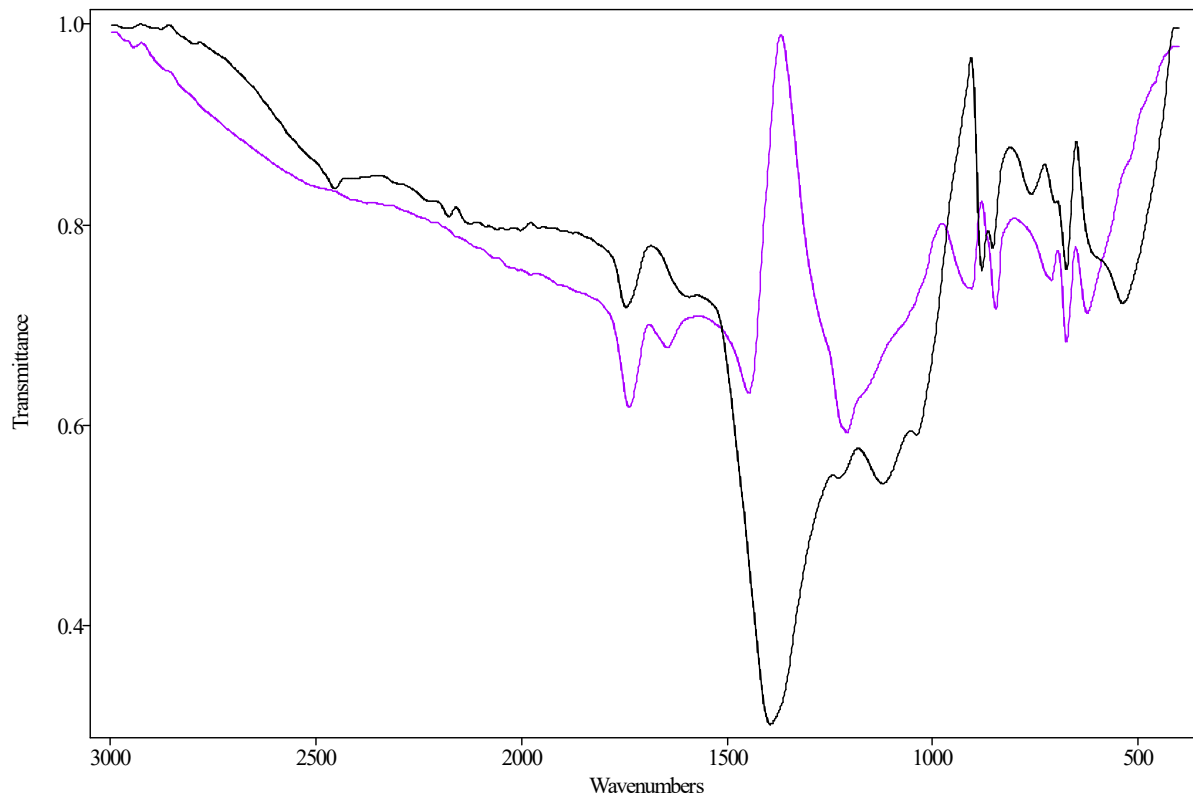*Figure A.16: FTIR overlay of oxidized silica SSA-3 (black) and oxidized silica-benzylated SSA-5 (purple)*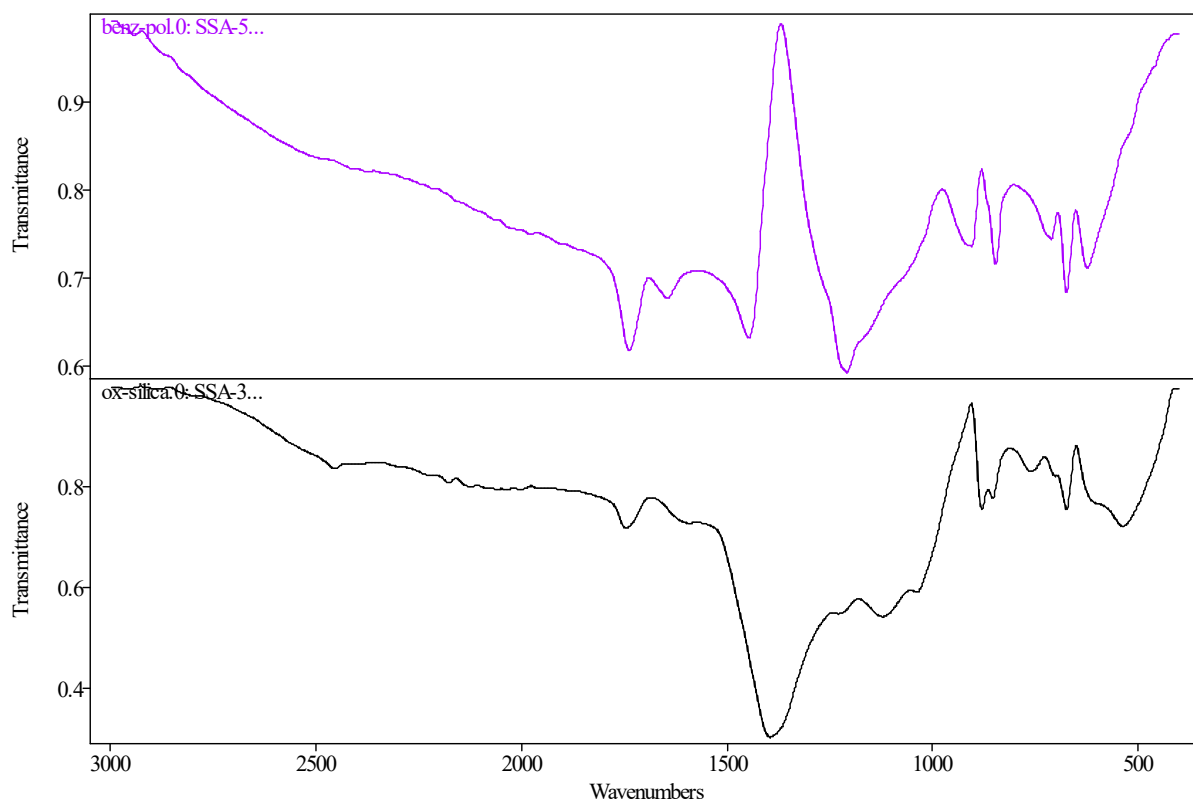*Figure A.17: FTIR stacked of oxidized silica SSA-3 (black) and oxidized silica-benzylated SSA-5 (purple)*

SSA-3, SSA-4 and SSA-5

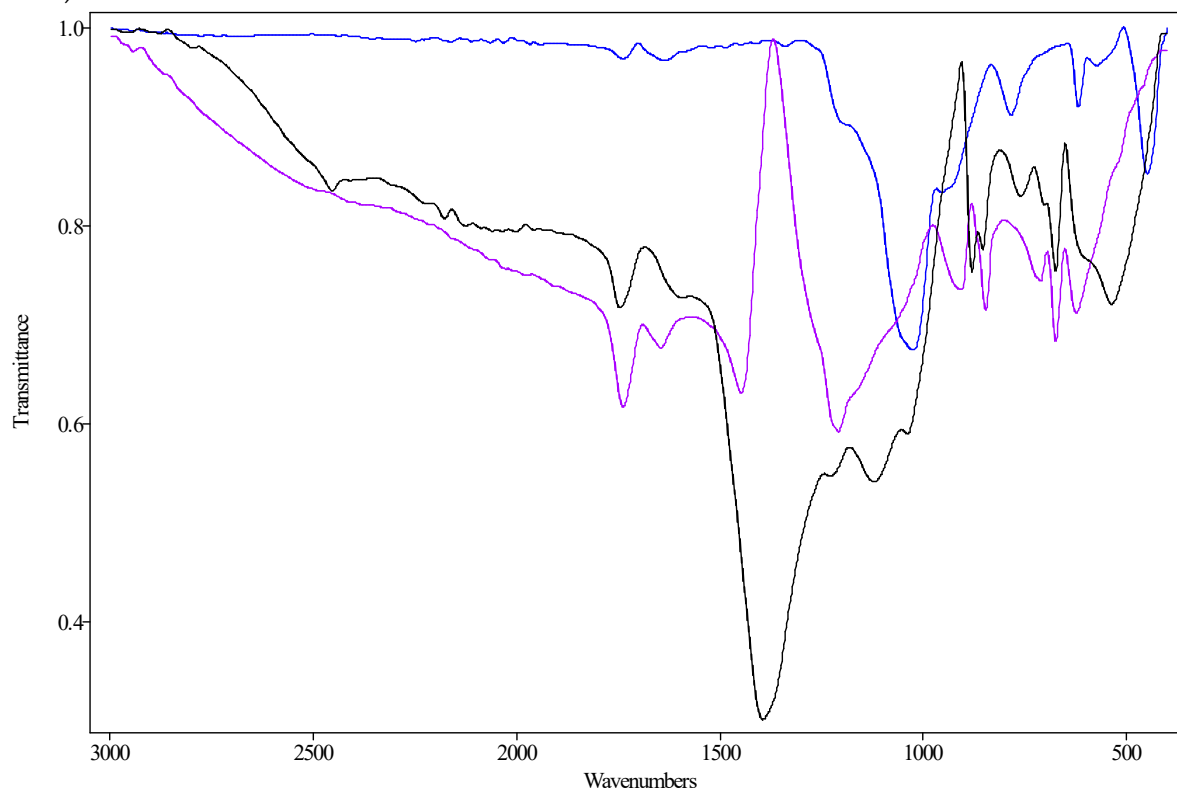

Figure A.18: FTIR overlay of oxidized silica **SSA-3** (black), oxidized silica-DNPH **SSA-4** (blue) and oxidized silica-benzylated **SSA-5** (purple)

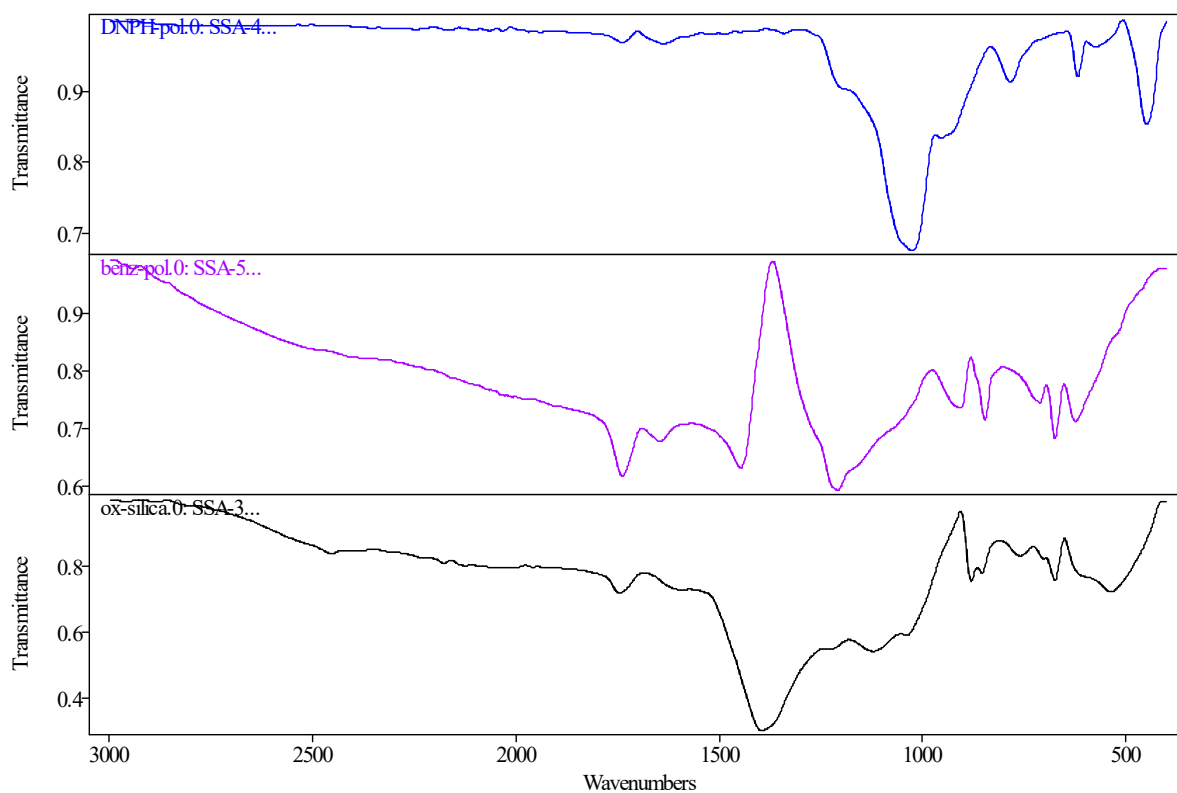

Figure A.19: FTIR stacked of oxidized silica **SSA-3** (black), oxidized silica-DNPH **SSA-4** (blue) and oxidized silica-benzylated **SSA-5** (purple)

Silica and SSA-6

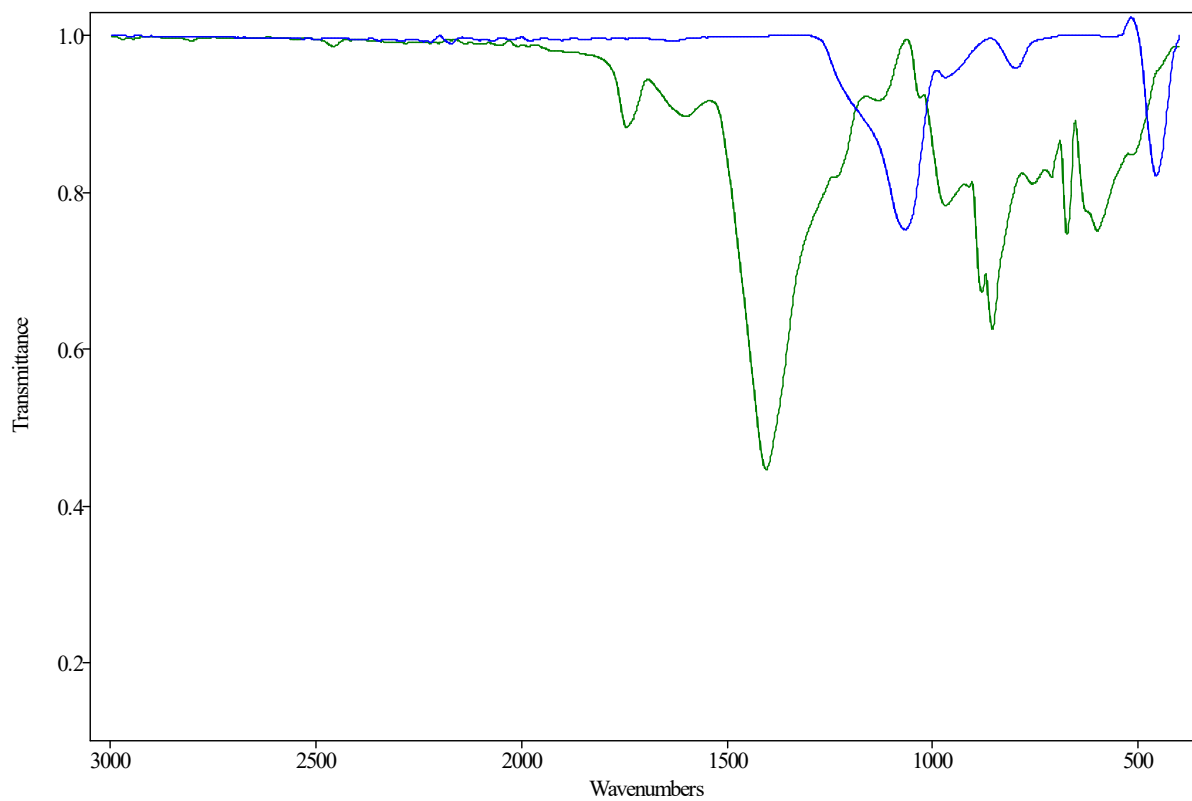Figure A.20: FTIR overlay of silica (blue) and silica-benzylated **SSA-6** (green)

Silica and SSA-7

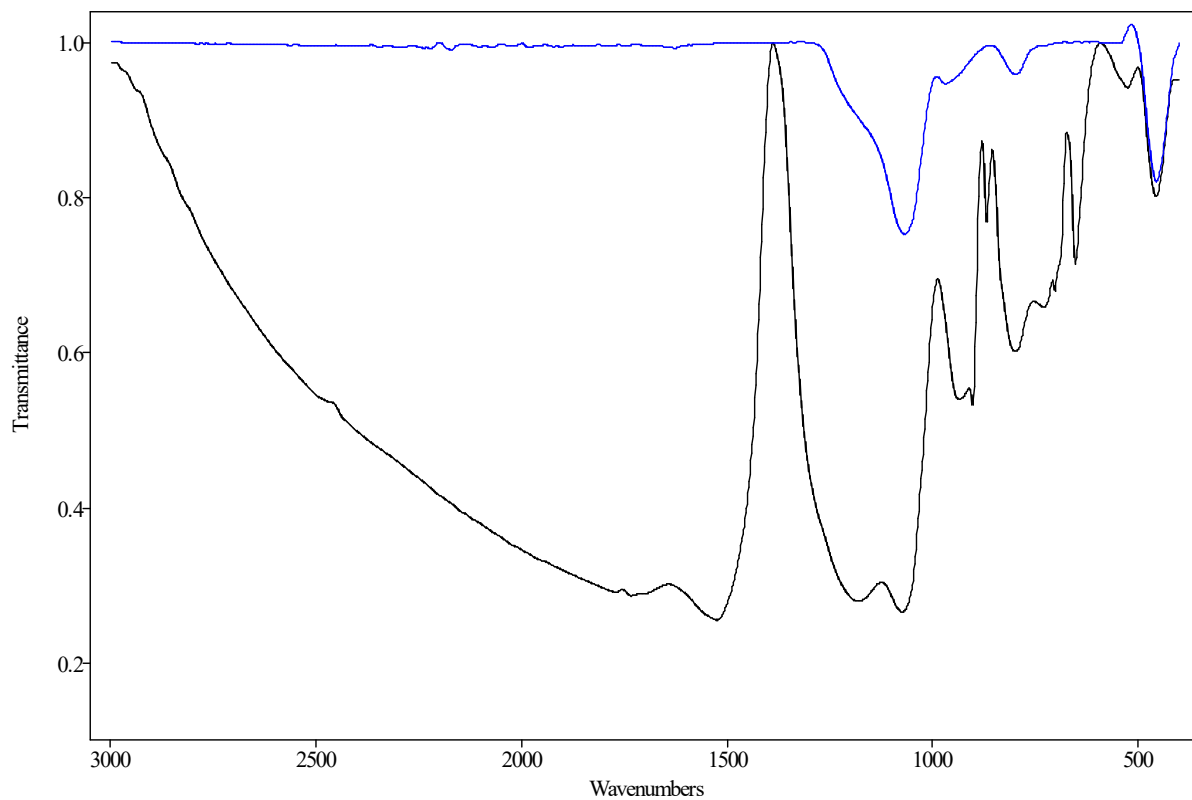Figure A.21: FTIR overlay of silica (blue) and silica-DNPH **SSA-7** (black)

Silica, SSA-6 and SSA-7

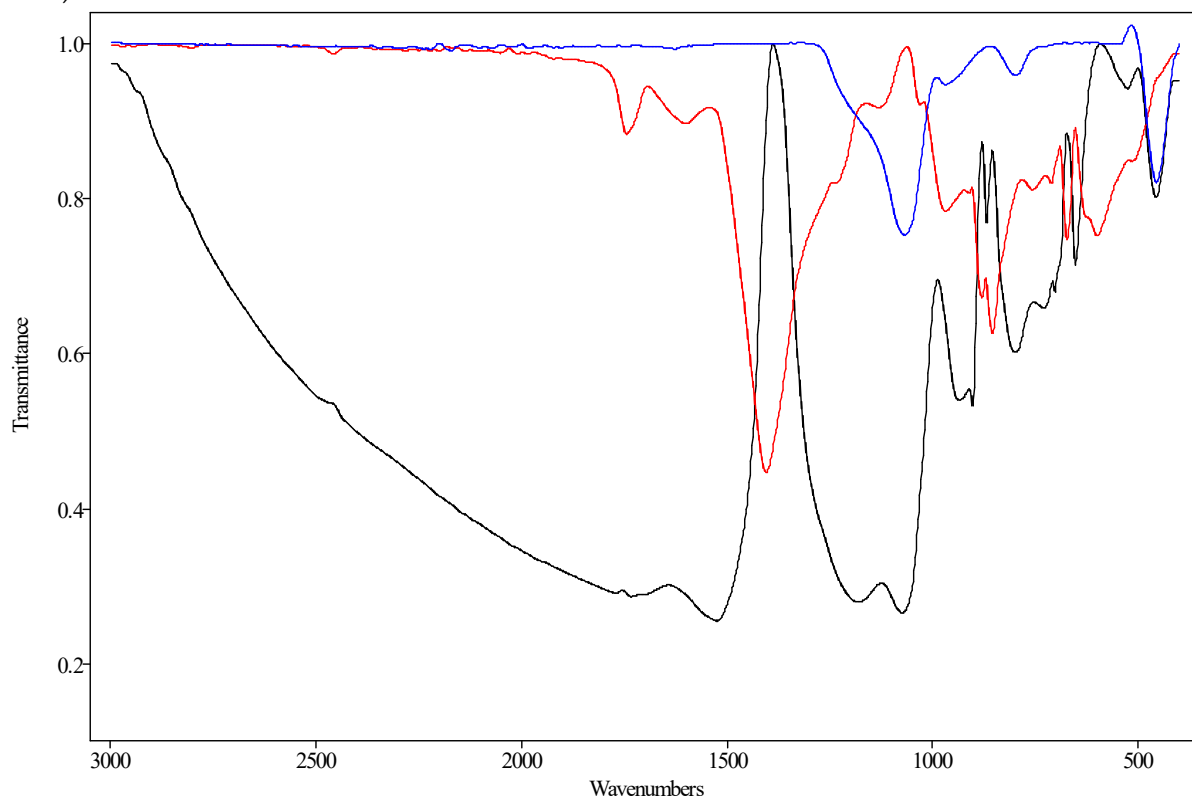

Figure A.22: FTIR overlay of silica (blue), silica-benzylated SSA-6 (red) and silica-DNPH SSA-7 (black)

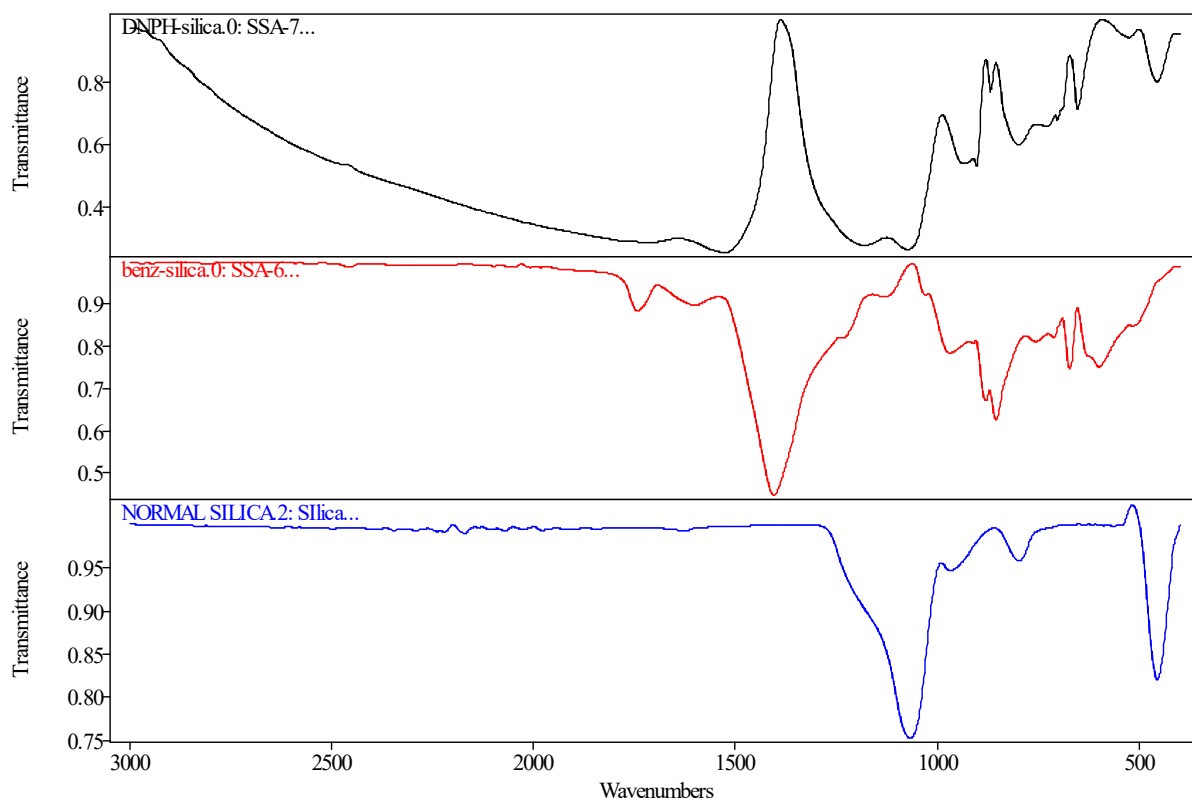

Figure A.23: FTIR stacked of silica (blue), silica-benzylated SSA-6 (red) and silica-DNPH SSA-7 (black)

SSA-4 and SSA-7

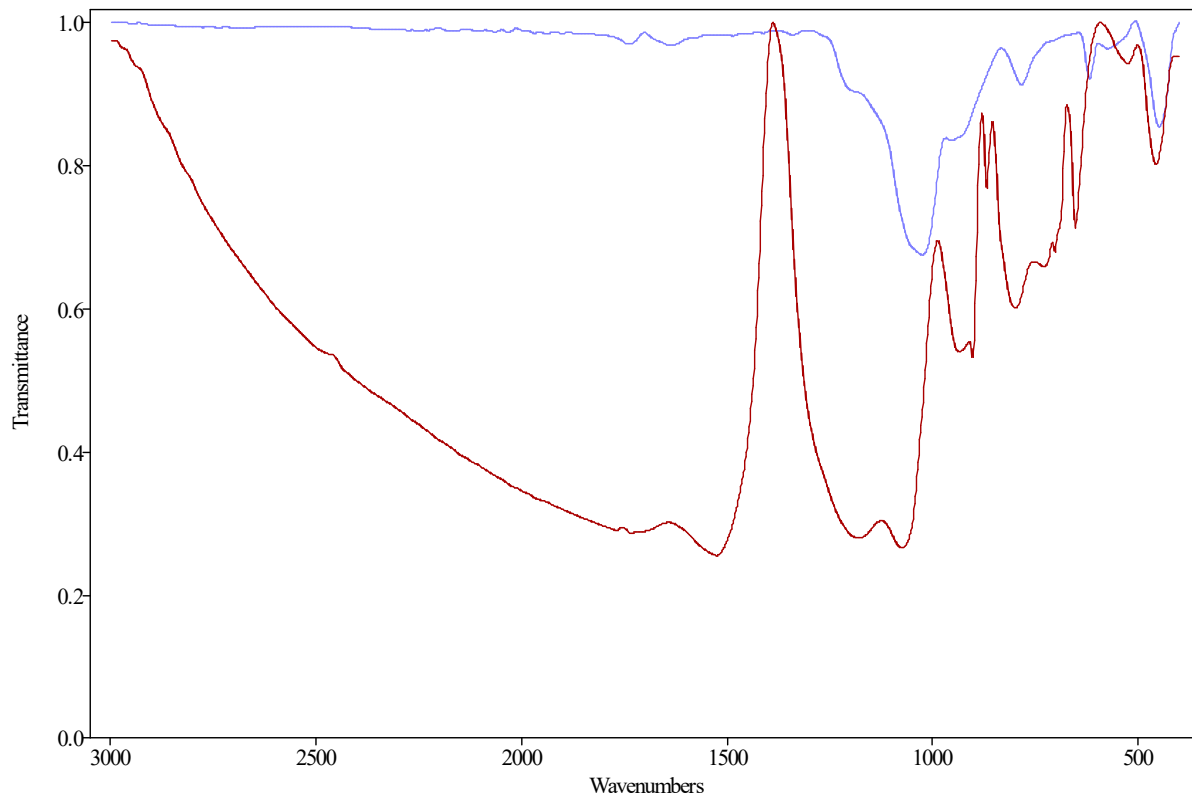Figure A.24: FTIR overlay of oxidized silica-DNP **SSA-4** (blue) and silica-DNPH **SSA-7** (brown)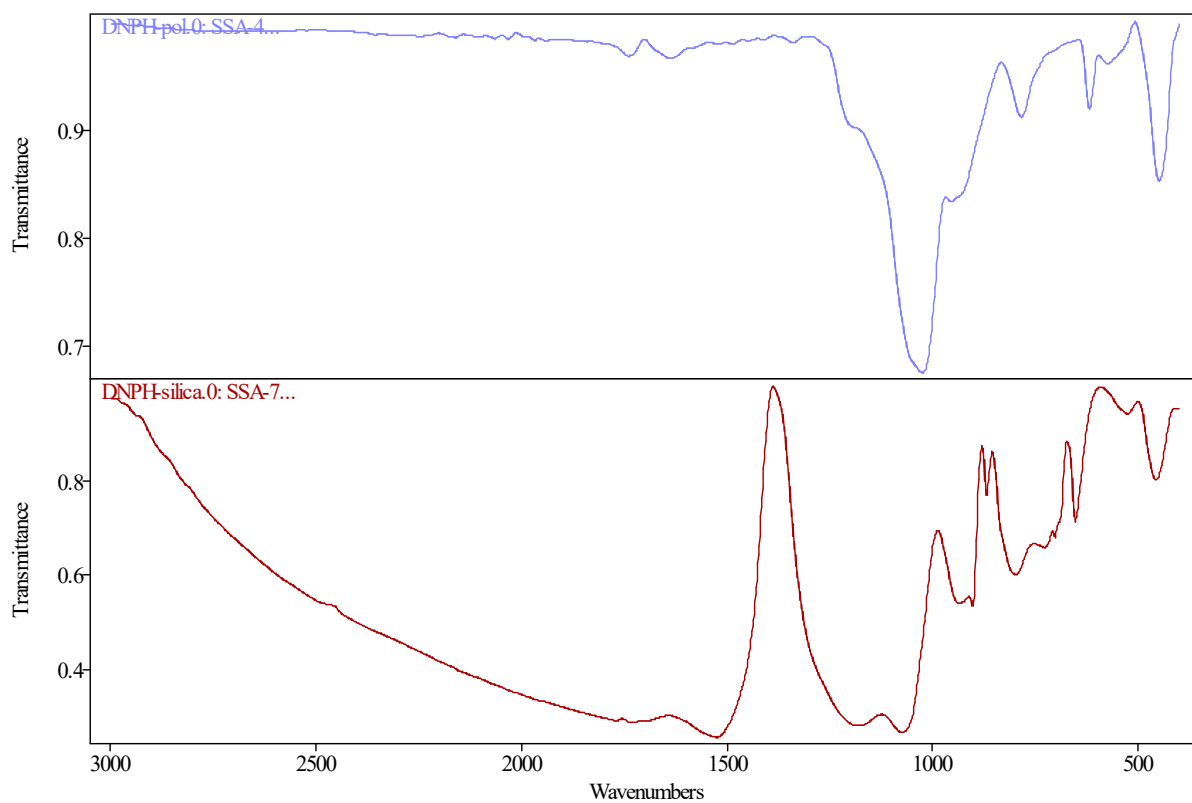Figure A.25: FTIR stacked of oxidized silica-DNP **SSA-4** (blue) and silica-DNPH **SSA-7** (brown)

SSA-5 and SSA-6

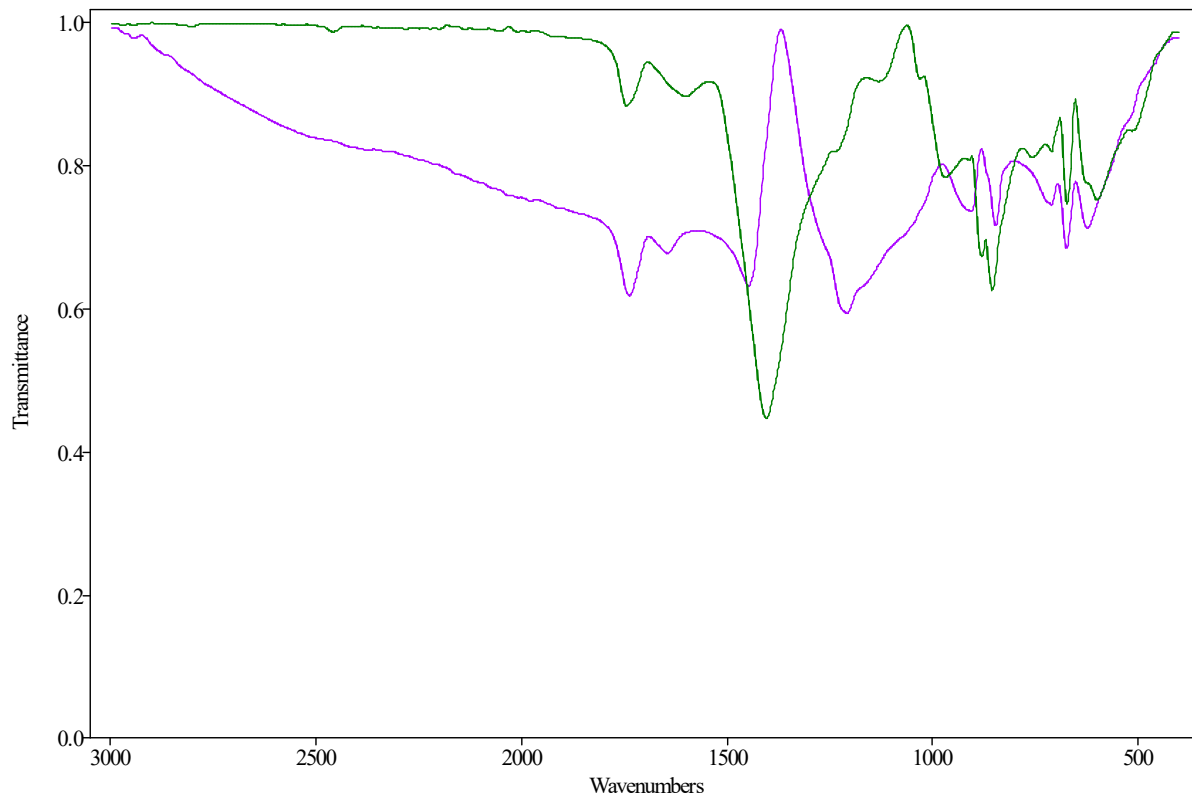Figure A.26: FTIR overlay of oxidized silica-benzylated **SSA-5** (purple) and silica-benzylated **SSA-6** (green)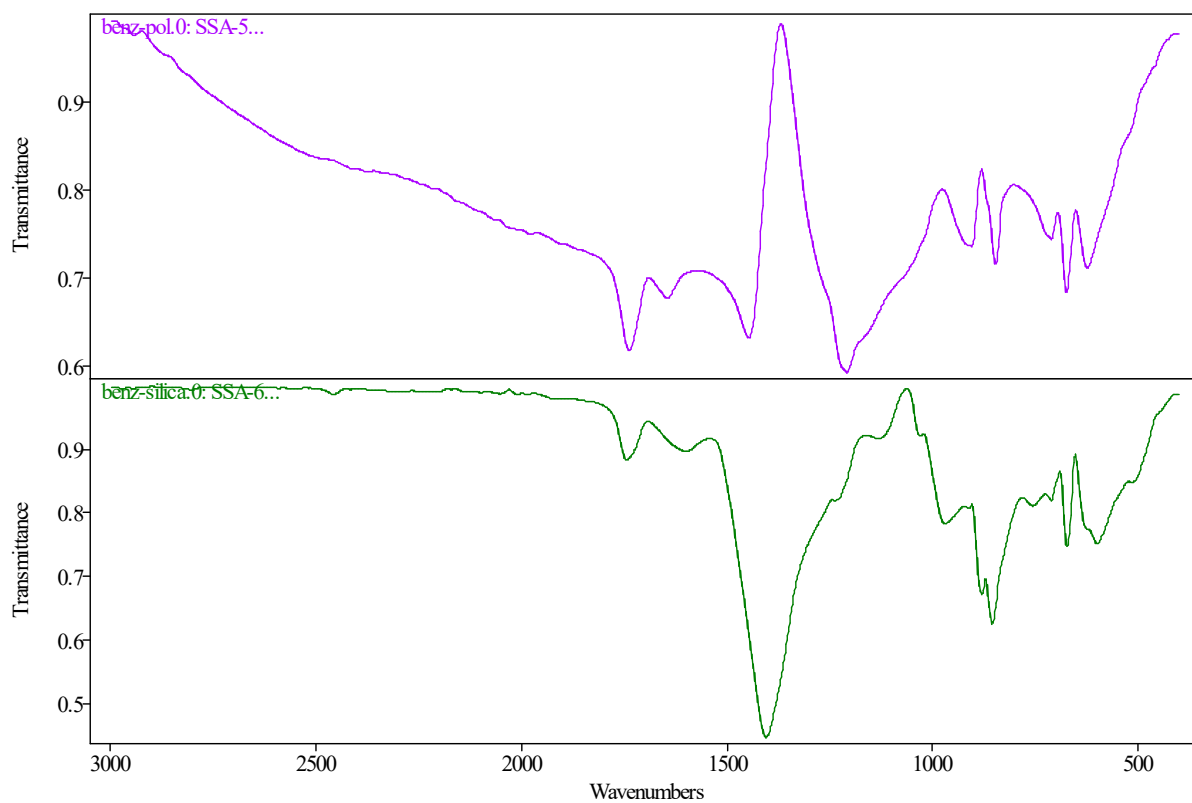Figure A.27: FTIR stacked of oxidized silica-benzylated **SSA-5** (purple) and silica-benzylated **SSA-6** (green)

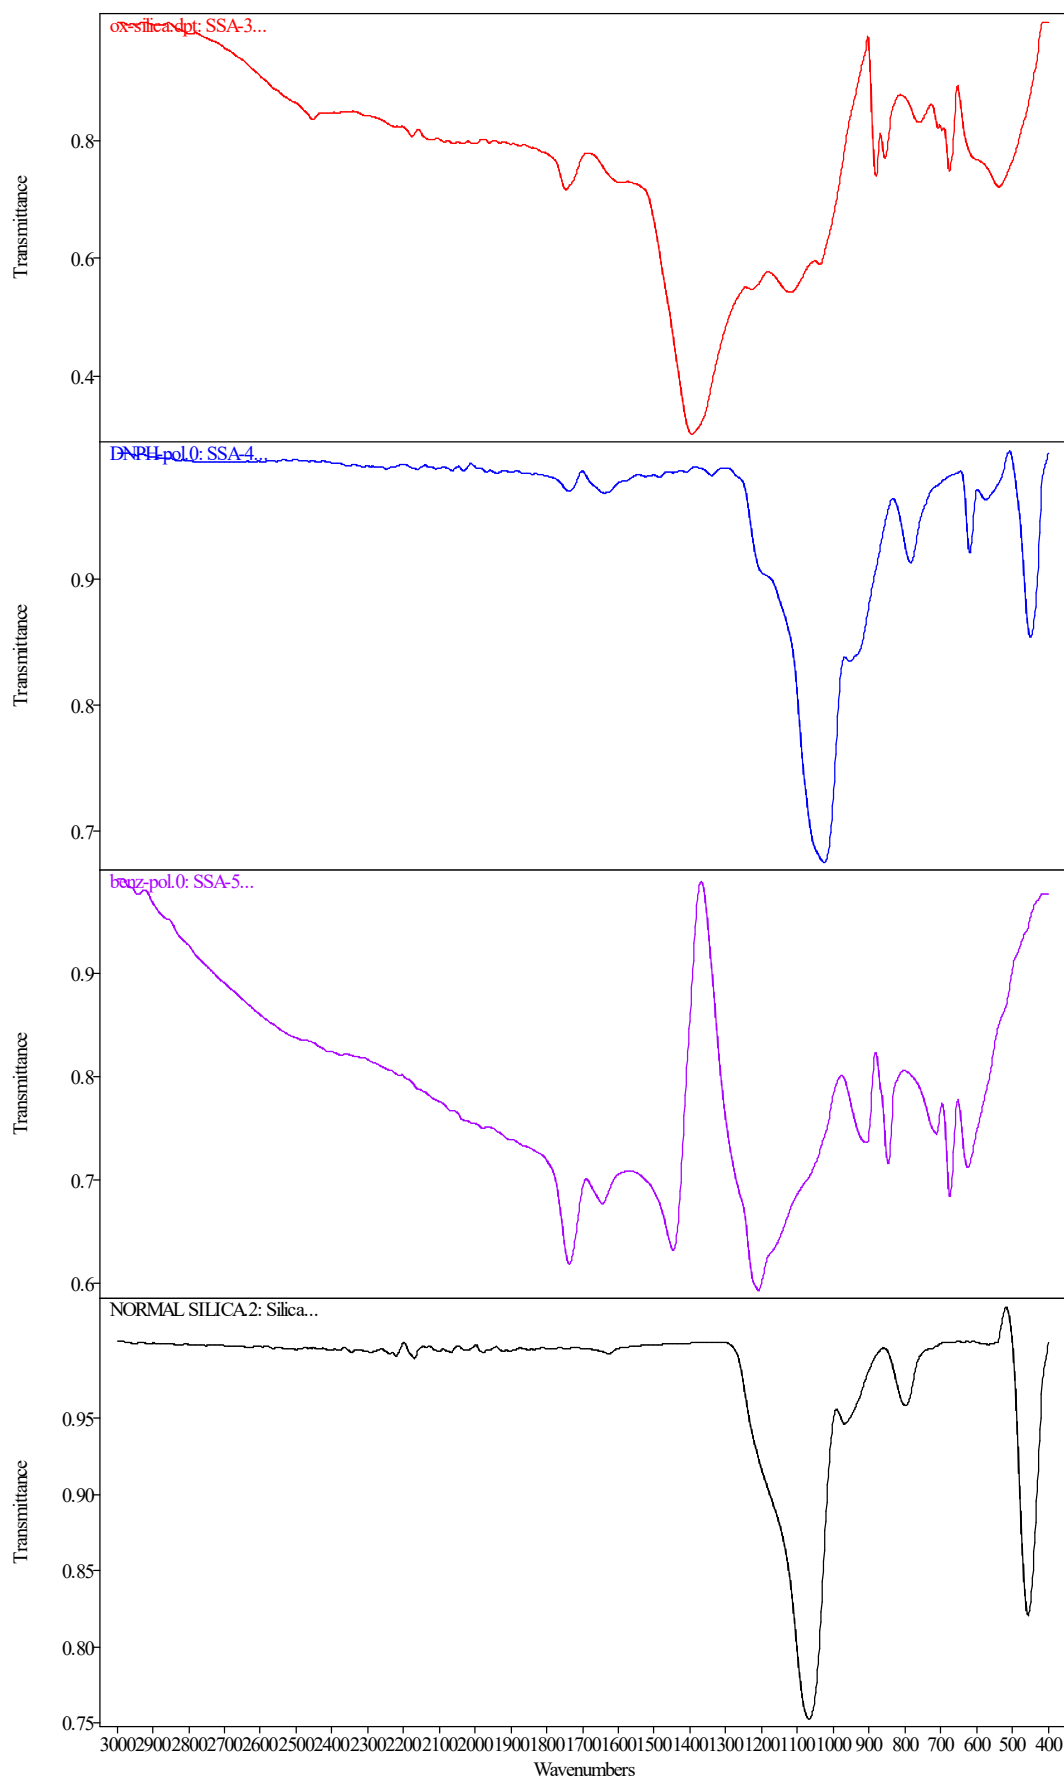

Figure A.28: FTIR stacked of silica (black), oxidized silica-benzylated **SSA-5** (purple), oxidized silica-DNPH **SSA-4** (blue) and oxidized silica **SSA-3** (red)

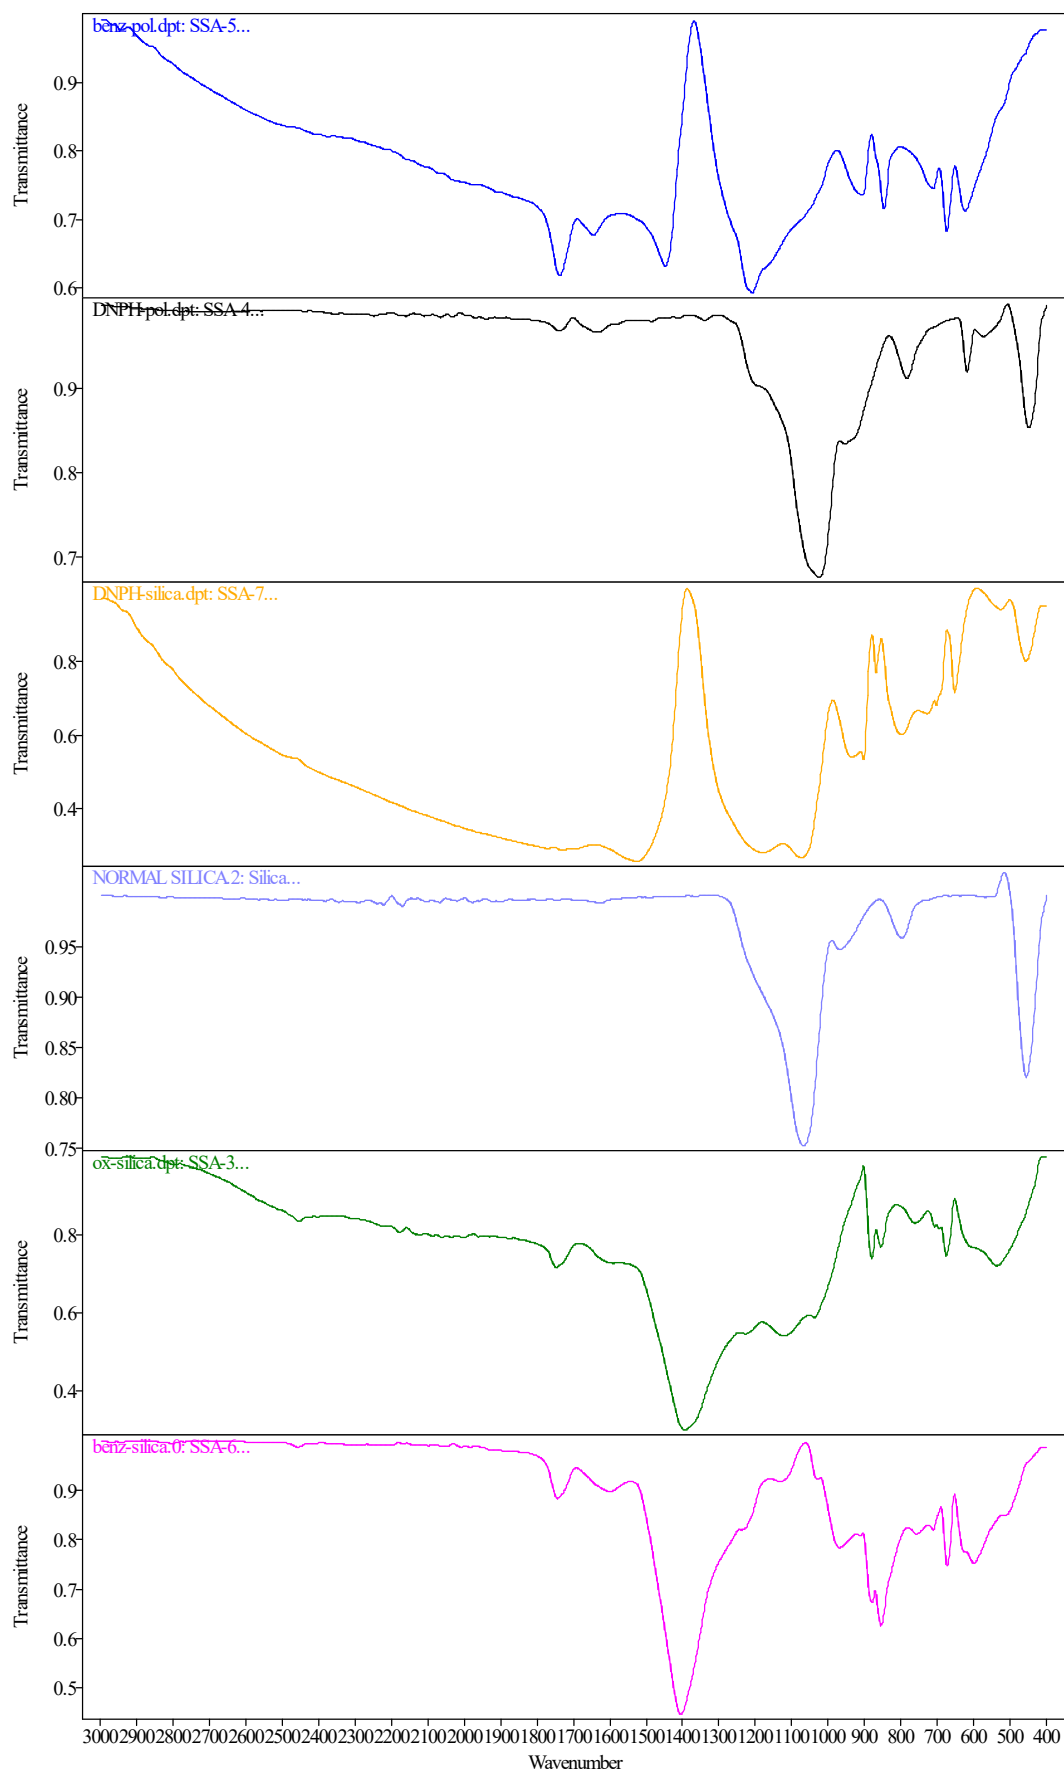

Figure A.29: FTIR stacked of silica (light blue), oxidized silica-benzylated **SSA-5** (blue), oxidized silica-DNPH **SSA-4** (black), silica-DNPH **SSA-7** (orange), silica-benzylated **SSA-6** (pink) and oxidized silica **SSA-3** (green)

## A-7 Qualitative results

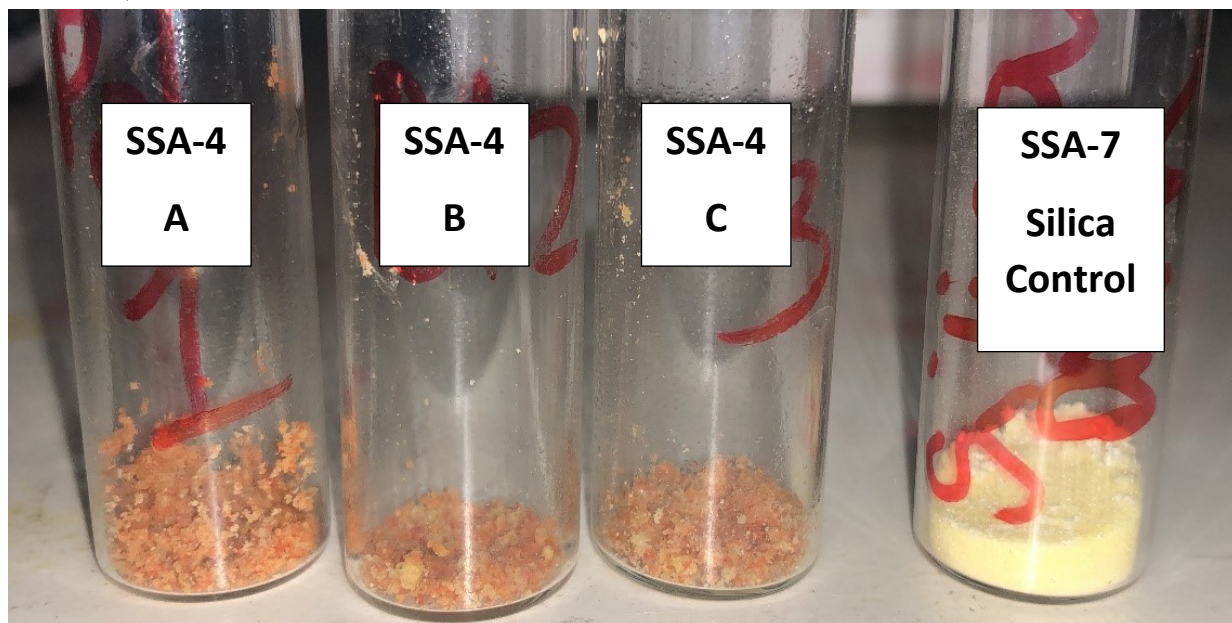

Figure A.30: Photograph of qualitative DNP test with oxidized silica **SSA-4** (repeats A-C) with the silica-DNPH **SSA-7** (control)

## A-8 DoE

Table A.17: D-optimal design set of experiments and calculated N-benzylamine **25** percentage unabsorbed

| Exp | F.R. | Temp | Conc | PC1 | PC2 | Q     | Solvent   | Run order | Column number | % unabsorbed |
|-----|------|------|------|-----|-----|-------|-----------|-----------|---------------|--------------|
| N1  | 1    | 30   | 0,2  | -1  | -1  | 3     | ACN       | 1         | 1             | 26,16        |
| N2  | 0,1  | 90   | 0,2  | -1  | -1  | 3     | ACN       | 2         | 1             | 0,02         |
| N3  | 0,1  | 30   | 1    | -1  | -1  | 3     | ACN       | 4         | 1             | 24,30        |
| N4  | 1    | 90   | 1    | -1  | -1  | 3     | ACN       | 3         | 1             | 24,91        |
| N5  | 0,1  | 30   | 0,2  | 1   | -1  | 4     | EtOAc     | 1         | 2             | 0,61         |
| N6  | 1    | 90   | 0,2  | 1   | -1  | 4     | EtOAc     | 3         | 2             | 0,27         |
| N7  | 1    | 30   | 1    | 1   | -1  | 4     | EtOAc     | 2         | 2             | 0,05         |
| N8  | 0,1  | 90   | 1    | 1   | -1  | 4     | EtOAc     | 4         | 2             | 0,06         |
| N9  | 0,1  | 30   | 0,2  | -1  | 1   | 2     | DMA       | 1         | 5             | 0,01         |
| N10 | 1    | 90   | 0,2  | -1  | 1   | 2     | DMA       | 3         | 5             | 0,12         |
| N11 | 1    | 30   | 1    | -1  | 1   | 2     | DMA       | 2         | 5             | 0,03         |
| N12 | 0,1  | 90   | 1    | -1  | 1   | 2     | DMA       | 4         | 5             | 0,003        |
| N13 | 1    | 30   | 0,2  | 1   | 1   | 1     | Anisole   | 2         | 3             | 0,04         |
| N14 | 0,1  | 90   | 0,2  | 1   | 1   | 1     | Anisole   | 4         | 3             | 0,09         |
| N15 | 0,1  | 30   | 1    | 1   | 1   | 1     | Anisole   | 1         | 3             | 1,68         |
| N16 | 1    | 90   | 1    | 1   | 1   | 1     | Anisole   | 3         | 3             | 0,04         |
| N17 | 0,55 | 90   | 0,6  | 0   | 0   | 0,0   | DCM       | 4A        | 4             | 15,58        |
| N18 | 0,55 | 60   | 1    | 0   | 0   | 0,0   | DCM       | 1B        | 6             | 10,75        |
| N19 | 0,55 | 60   | 0,6  | 1   | 0   | (1;0) | Cyclo-Hex | 1C        | 7             | 12,81        |
| N20 | 0,55 | 60   | 0,6  | 0   | 0   | 0,0   | DCM       | 1A        | 4             | 11,32        |
| N21 | 0,55 | 60   | 0,6  | 0   | 0   | 0,0   | DCM       | 2A        | 4             | 11,28        |
| N22 | 0,55 | 60   | 0,6  | 0   | 0   | 0,0   | DCM       | 3A        | 4             | 13,54        |

Table A.18: Individual column details for DOE experiments

| Column number  | Polymer mass (g) | Polymer height (cm) | Column dry mass (g) | Column wet mass (g) | Mass difference (g) | Solvent  | Density (g/mL) | Wet volume (mL) |
|----------------|------------------|---------------------|---------------------|---------------------|---------------------|----------|----------------|-----------------|
| 1              | 4.5055           | 4.60                | 63.6555             | 65.8886             | 2.2331              | ACN      | 0.786          | 2.84            |
| 2              | 4.5029           | 4.62                | 63.8170             | 66.1497             | 2.3327              | EtOAc    | 0.902          | 2.59            |
| 3              | 4.5039           | 4.55                | 63.5983             | 65.7533             | 2.1550              | Anisole  | 0.995          | 2.17            |
| 4              | 4.5089           | 4.75                | 63.6634             | 68.0806             | 4.4172              | DCM      | 1.33           | 3.32            |
| 5              | 4.5085           | 4.65                | 63.5525             | 68.7288             | 5.1763              | DMA      | 0.940          | 5.51            |
| 6              | 4.5043           | 4.80                | 63.6820             | 68.2705             | 4.5885              | DCM      | 1.33           | 3.45            |
| 7              | 4.5009           | 4.65                | 63.8465             | 65.8909             | 2.0444              | Cyclohex | 0.779          | 2.62            |
| <b>Average</b> | 4,5050           | 4,66                | 63,6879             |                     |                     |          |                |                 |
| <b>STD Dev</b> | 0,0027           | 0,08                | 0,0999              |                     |                     |          |                |                 |

## A-9 DoE data

## Factors and Responses

Table A.19: Summary of factors

| Name          | Abbreviation | Units  | Type         | Settings |
|---------------|--------------|--------|--------------|----------|
| Flow Rate     | FR           | mL/min | Quantitative | 0,1 to 1 |
| Temperature   | Temp         | Deg C  | Quantitative | 30 to 90 |
| Concentration | Conc         | M      | Quantitative | 0,2 to 1 |
| Solvent PC1   | S.PC1        |        | Quantitative | -1 to 1  |
| Solvent PC2   | S.PC2        |        | Quantitative | -1 to 1  |

Table A.20: Summary of responses

| Name        | Abbr. | Units | Transform                  | Condition | Objective | Min | Target | Max |
|-------------|-------|-------|----------------------------|-----------|-----------|-----|--------|-----|
| Benzylamine | %BnNh | %     | Log:<br>10Log(10*<br>Y+30) | Required  | Minimize  | 0   | 0,5    | 100 |

Replicates and Residuals

Table A.21: Plots of replicates (a), residuals (b), distribution histogram (c), main effects for flow rate (d), solvent PC1 dimension (e), solvent PC2 dimension (f), Summary of fit (g), and interaction plots of FR\*S.PC1 in terms of flow rate (h), Interaction plot S.PC1\*S.PC2 in terms of solvent PC1 dimension (i) and solvent PC2 dimension (j)

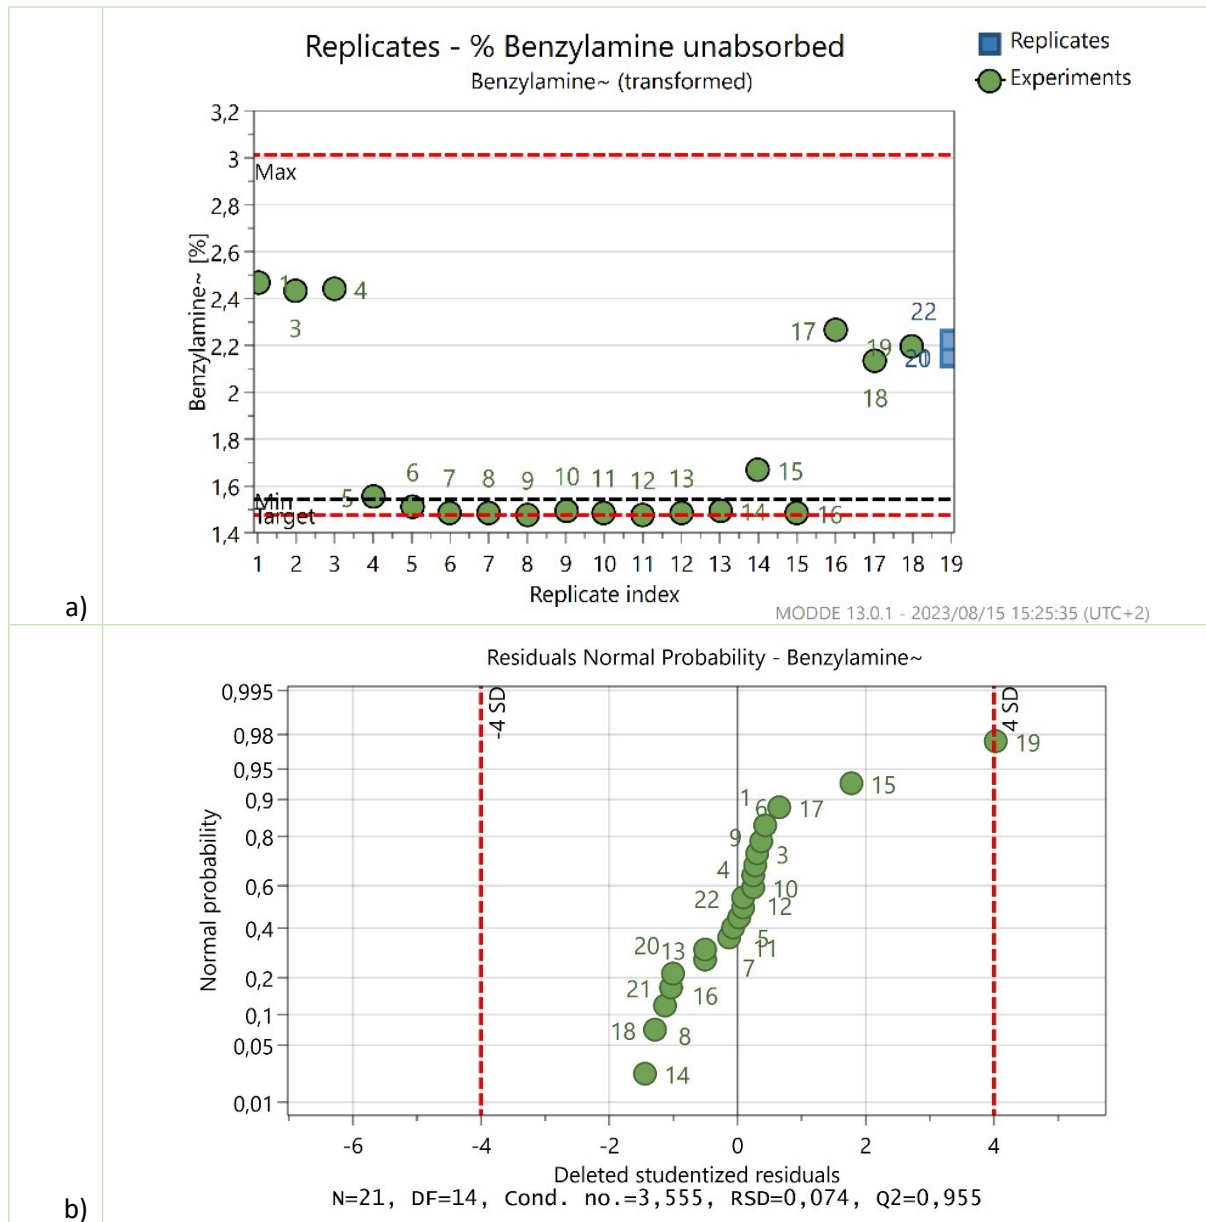

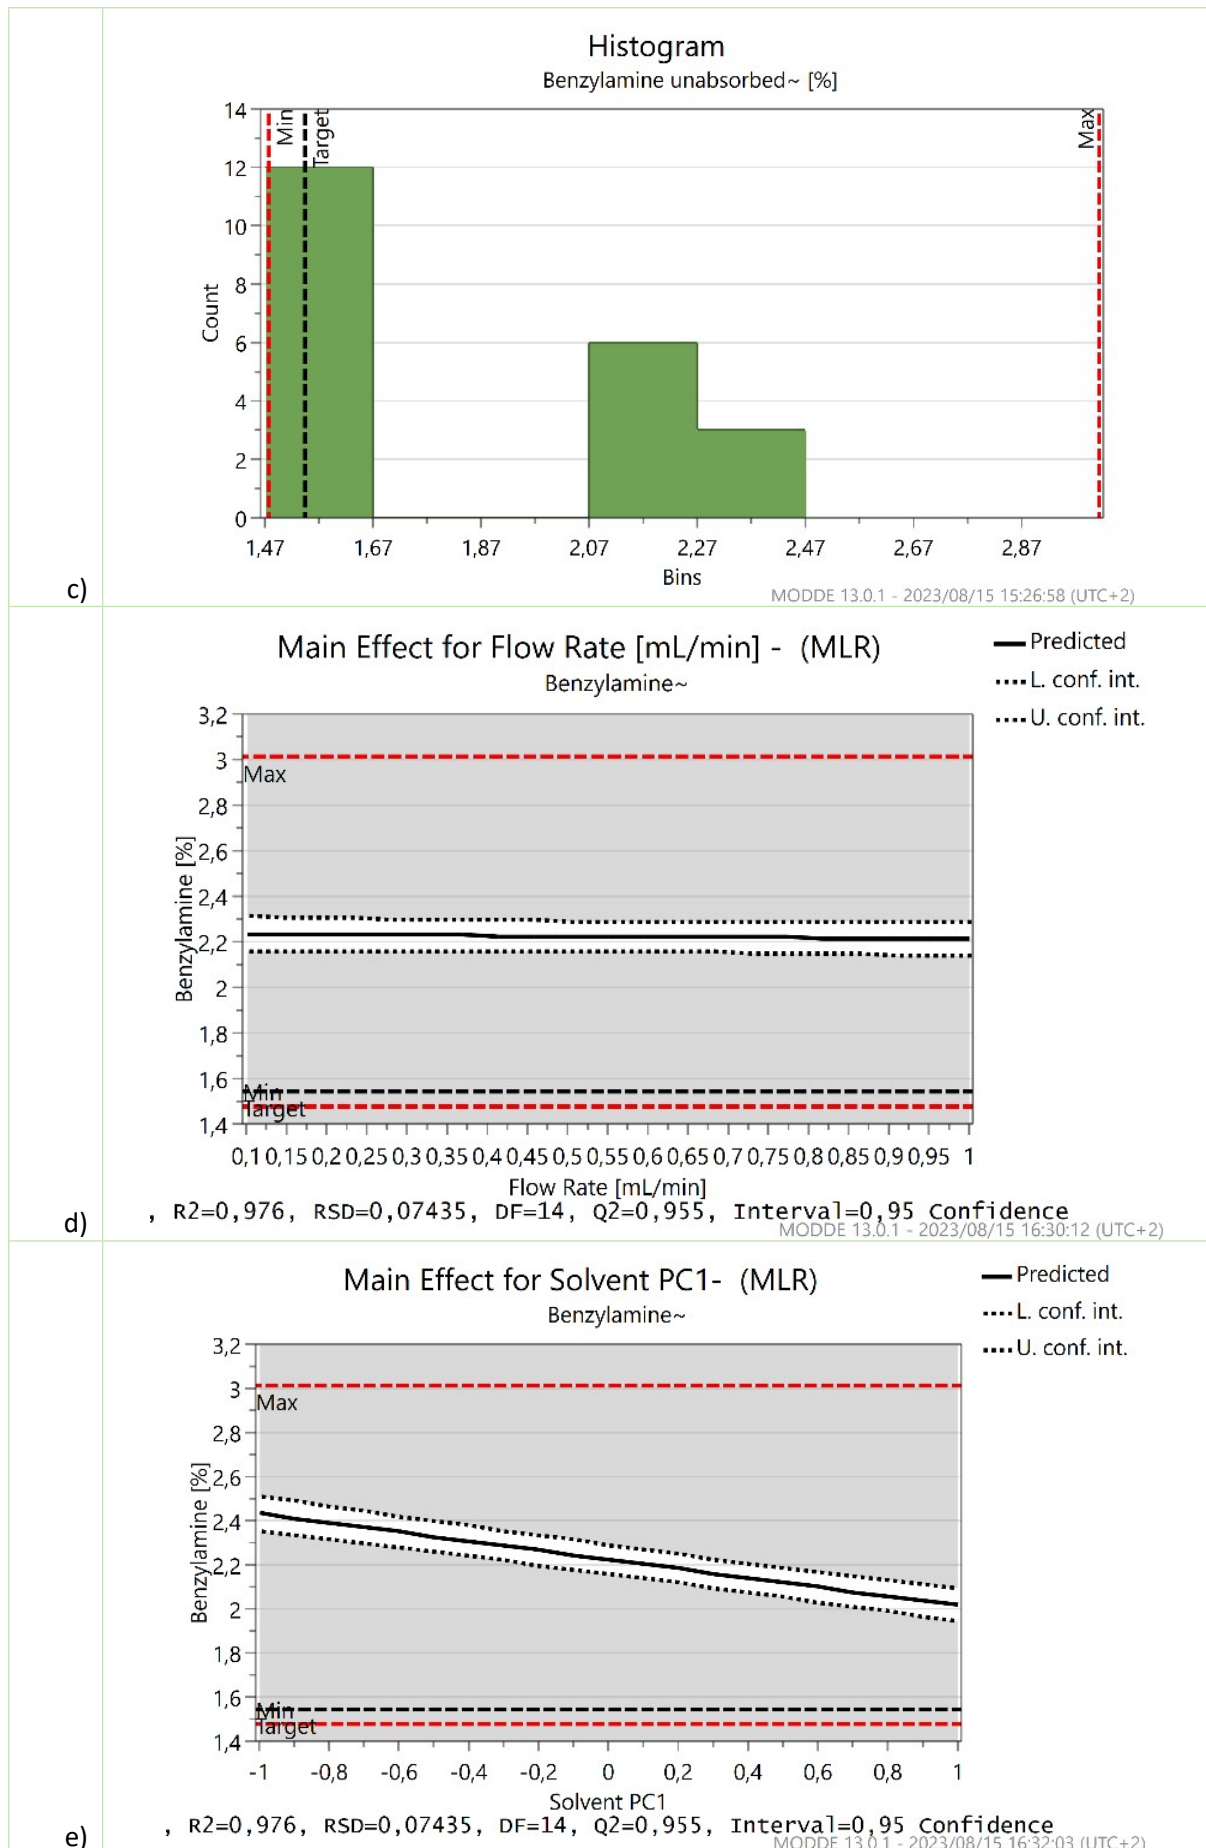

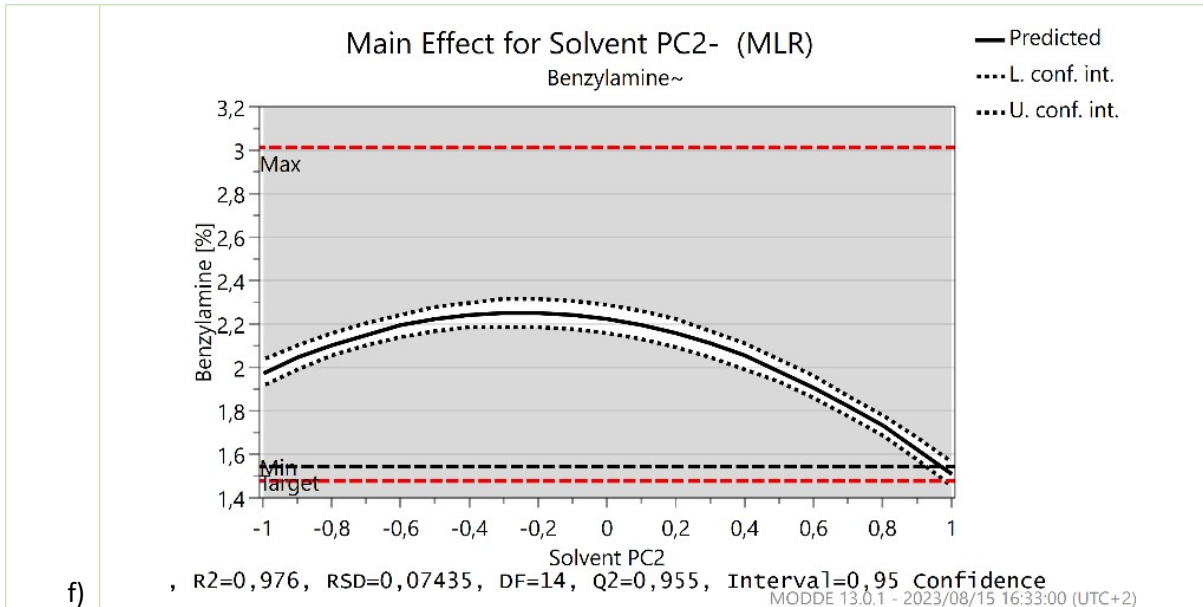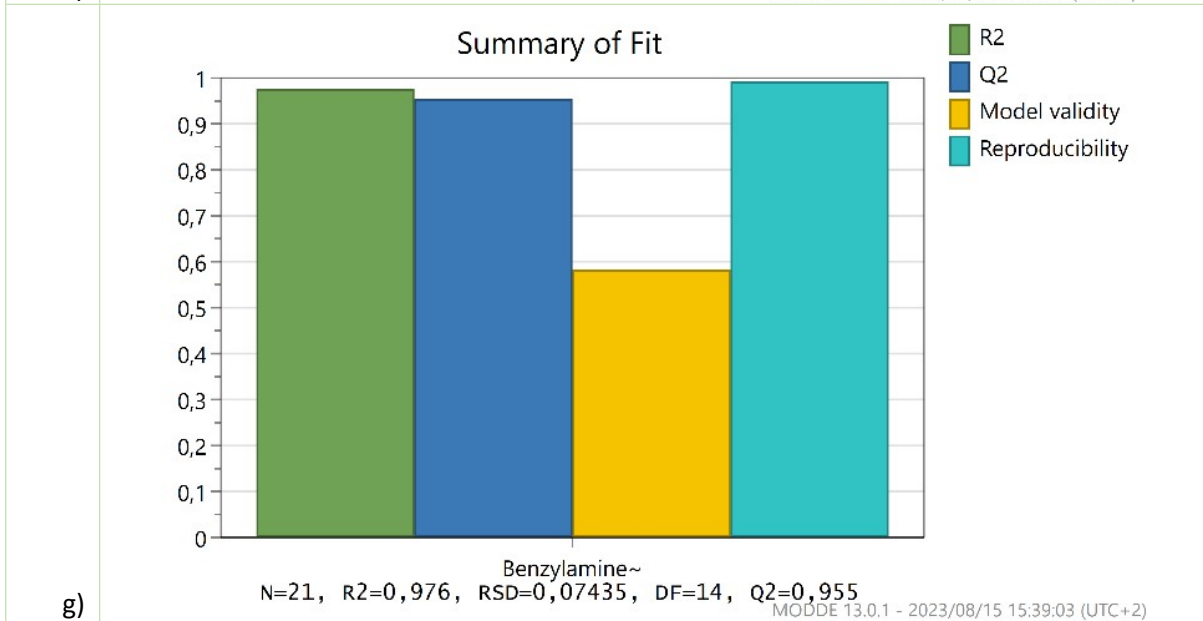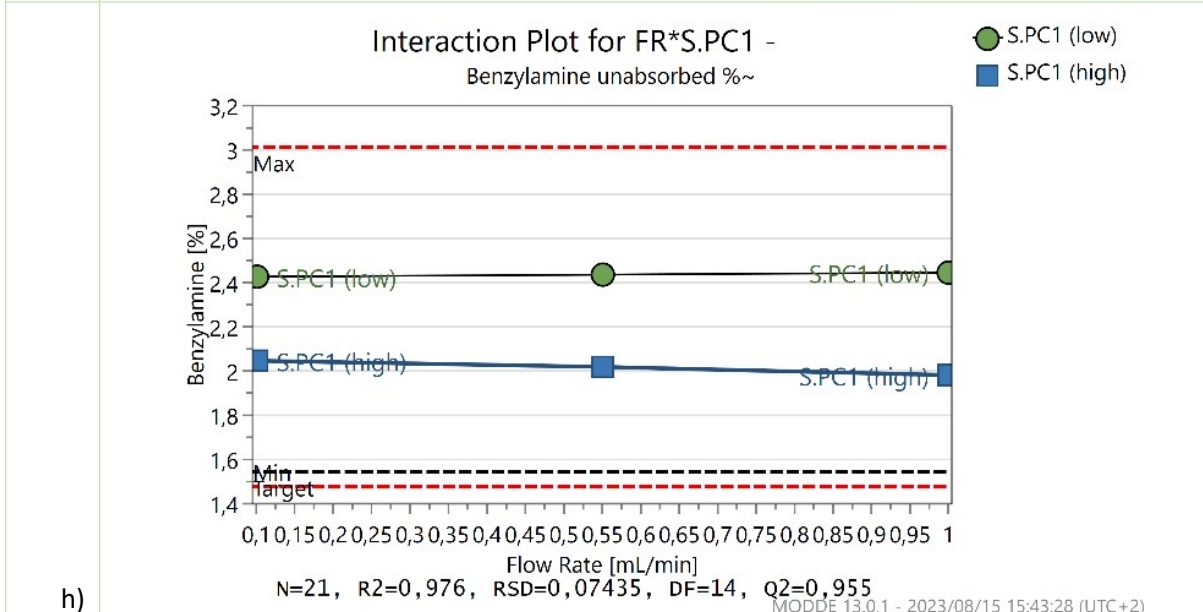

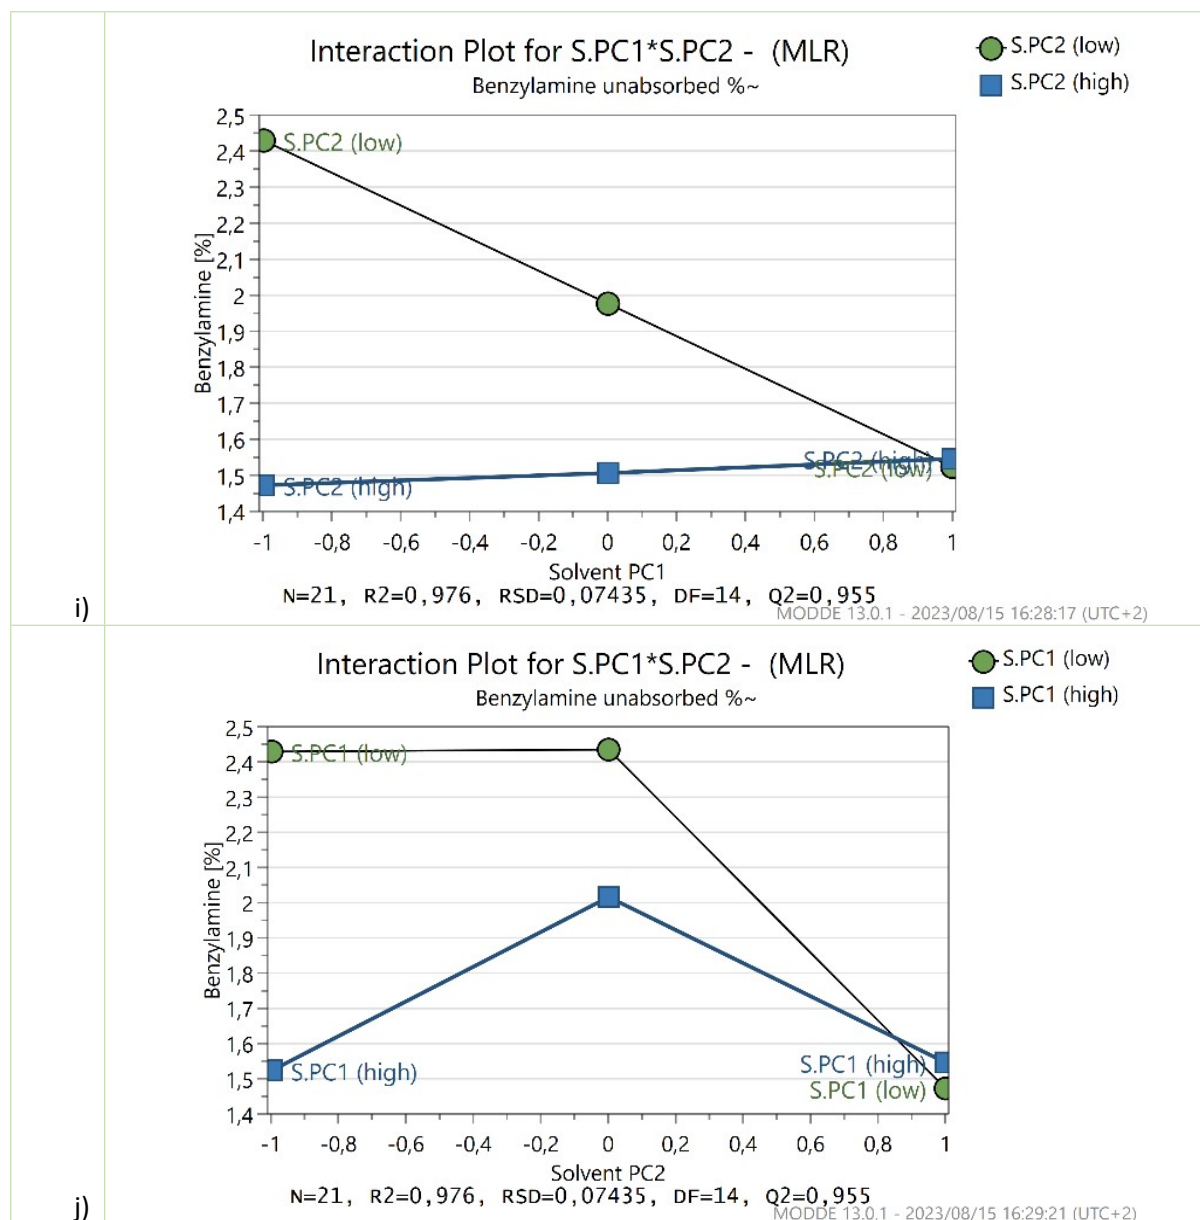

Coefficients

Table A.22: Summary of coefficients

| Benzylamine    | Coeff. SC  | Std. Err. | P            | Conf. int(±) |
|----------------|------------|-----------|--------------|--------------|
| Constant       | 2,22412    | 0,0305158 | 1,81829e-19  | 0,0654505    |
| Flow Rate      | -0,0103658 | 0,0194894 | 0,603156     | 0,041801     |
| Solvent PC1    | -0,209203  | 0,0189583 | 2,72256e-08  | 0,0406618    |
| Solvent PC2    | -0,234532  | 0,0194894 | 9,02145e-09  | 0,041801     |
| S.PC2*S.PC2    | -0,482399  | 0,0360577 | 2,28886e-09  | 0,0773368    |
| FR*S.PC1       | -0,019466  | 0,0194894 | 0,334842     | 0,041801     |
| S.PC1*S.PC2    | 0,245063   | 0,0194894 | 5,12186e-09  | 0,041801     |
| <b>N = 21</b>  | Q2 =       | 0,955     | Cond. no. =  | 3,555        |
| <b>DF = 14</b> | R2 =       | 0,976     | RSD =        | 0,07435      |
|                | R2 adj. =  | 0,966     |              |              |
|                |            |           | Confidence = | 0,95         |

## Effects

Table A.23: Summary of effects

| Benzylamine        | Effect     | Conf. int(±) |              |         |
|--------------------|------------|--------------|--------------|---------|
| <b>S.PC2*S.PC2</b> | -0,964797  | 0,154674     |              |         |
| <b>S.PC1*S.PC2</b> | 0,490127   | 0,083602     |              |         |
| <b>Solvent PC2</b> | -0,469064  | 0,083602     |              |         |
| <b>Solvent PC1</b> | -0,418405  | 0,0813236    |              |         |
| <b>FR*S.PC1</b>    | -0,0389321 | 0,083602     |              |         |
| <b>Flow Rate</b>   | -0,0207315 | 0,083602     |              |         |
| <b>N = 21</b>      | Q2 =       | 0,955        | Cond. no. =  | 3,555   |
| <b>DF = 14</b>     | R2 =       | 0,976        | RSD =        | 0,07435 |
|                    | R2 adj. =  | 0,966        |              |         |
|                    |            |              | Confidence = | 0,95    |

## Summary of fit

Table A.24: Summary of fit

|                    | R2          | R2 Adj.  | Q2       | SDY      | RSD       | N  | Model Validity | Reproducibility |
|--------------------|-------------|----------|----------|----------|-----------|----|----------------|-----------------|
| <b>Benzylamine</b> | 0,975901    | 0,965573 | 0,954751 | 0,400691 | 0,0743463 | 21 | 0,583223       | 0,99172         |
| <b>N = 21</b>      | Cond. no. = | 3,555    |          |          |           |    |                |                 |
| <b>DF = 14</b>     |             |          |          |          |           |    |                |                 |

## ANOVA

Table A.25: Analysis of variance

| Benzylamine                         | DF      | SS        | MS (variance) | F           | p            | SD        |
|-------------------------------------|---------|-----------|---------------|-------------|--------------|-----------|
| <b>Total</b>                        | 21      | 74,0938   | 3,52827       |             |              |           |
| <b>Constant</b>                     | 1       | 70,8827   | 70,8827       |             |              |           |
| <b>Total corrected</b>              | 20      | 3,21106   | 0,160553      |             |              | 0,400691  |
| <b>Regression</b>                   | 6       | 3,13368   | 0,52228       | 94,4896     | <b>0,000</b> | 0,722689  |
| <b>Residual</b>                     | 14      | 0,0773833 | 0,00552738    |             |              | 0,0743463 |
| <b>Lack of Fit (Model error)</b>    | 12      | 0,0747244 | 0,00622703    | 4,68391     | <b>0,189</b> | 0,0789116 |
| <b>Pure error (Replicate error)</b> | 2       | 0,0026589 | 0,00132945    |             |              | 0,0364616 |
|                                     | N = 21  | Q2 =      | 0,955         | Cond. no. = | 3,555        |           |
|                                     | DF = 14 | R2 =      | 0,976         | RSD =       | 0,07435      |           |
|                                     |         | R2 adj. = | 0,966         |             |              |           |

## Response surface plots

Table A.26: Response surface plots

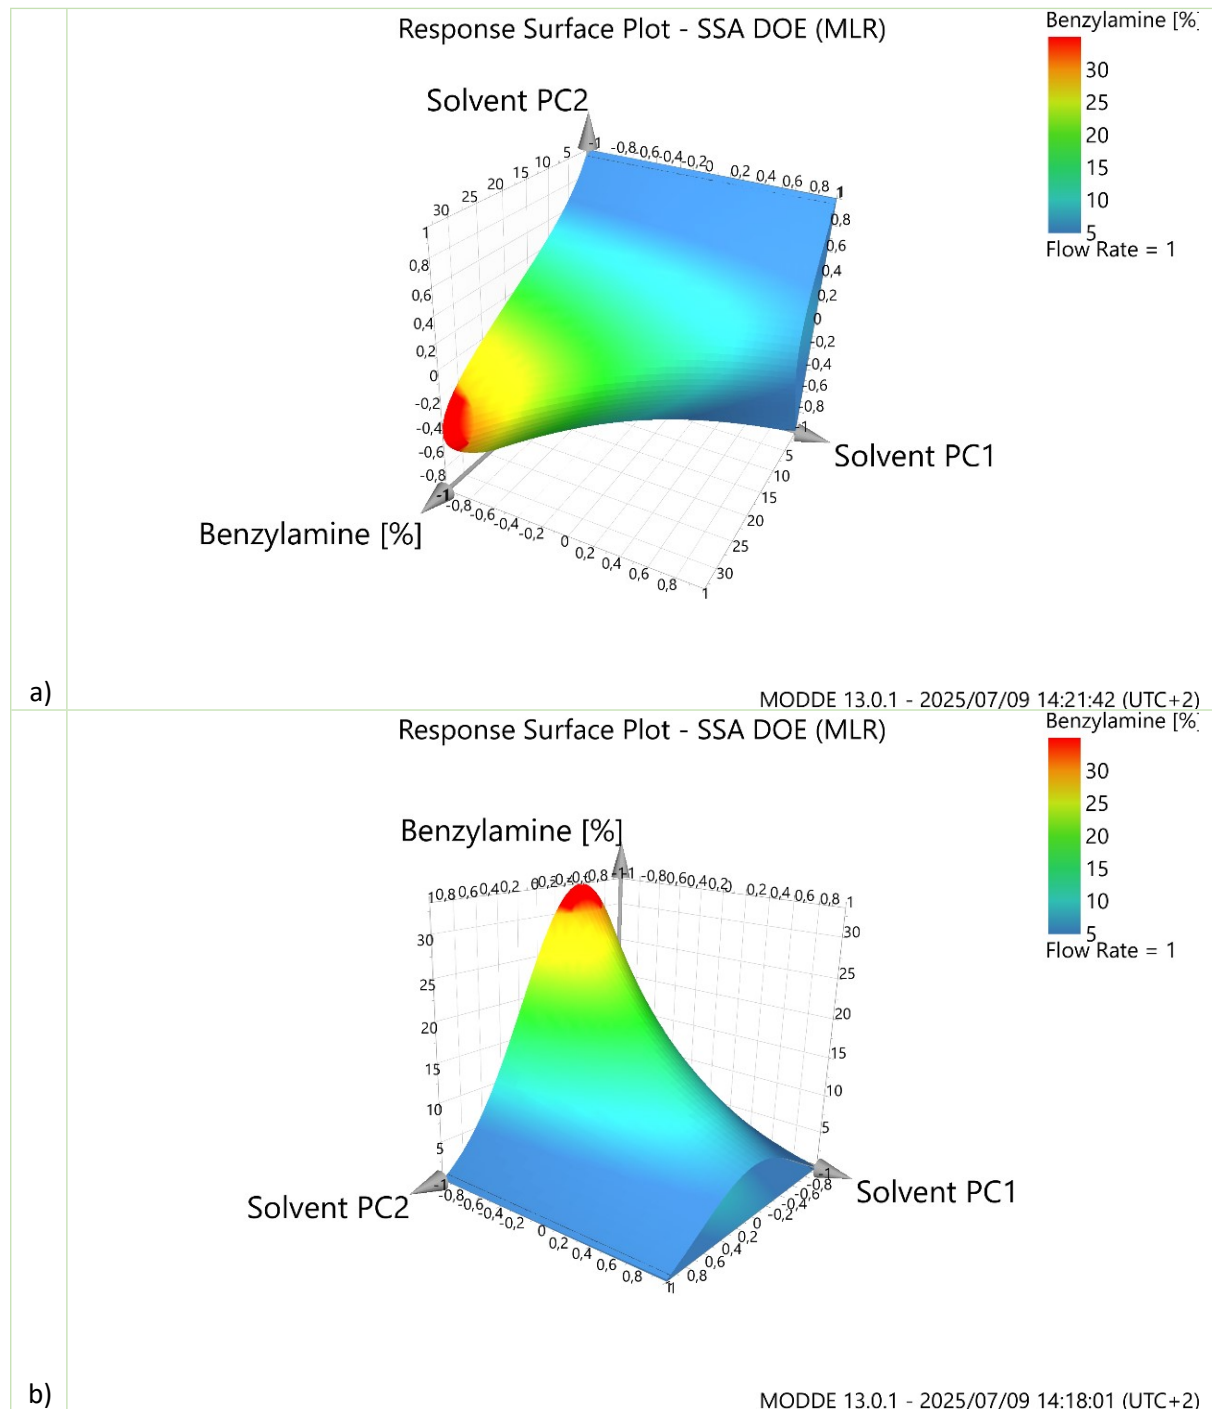

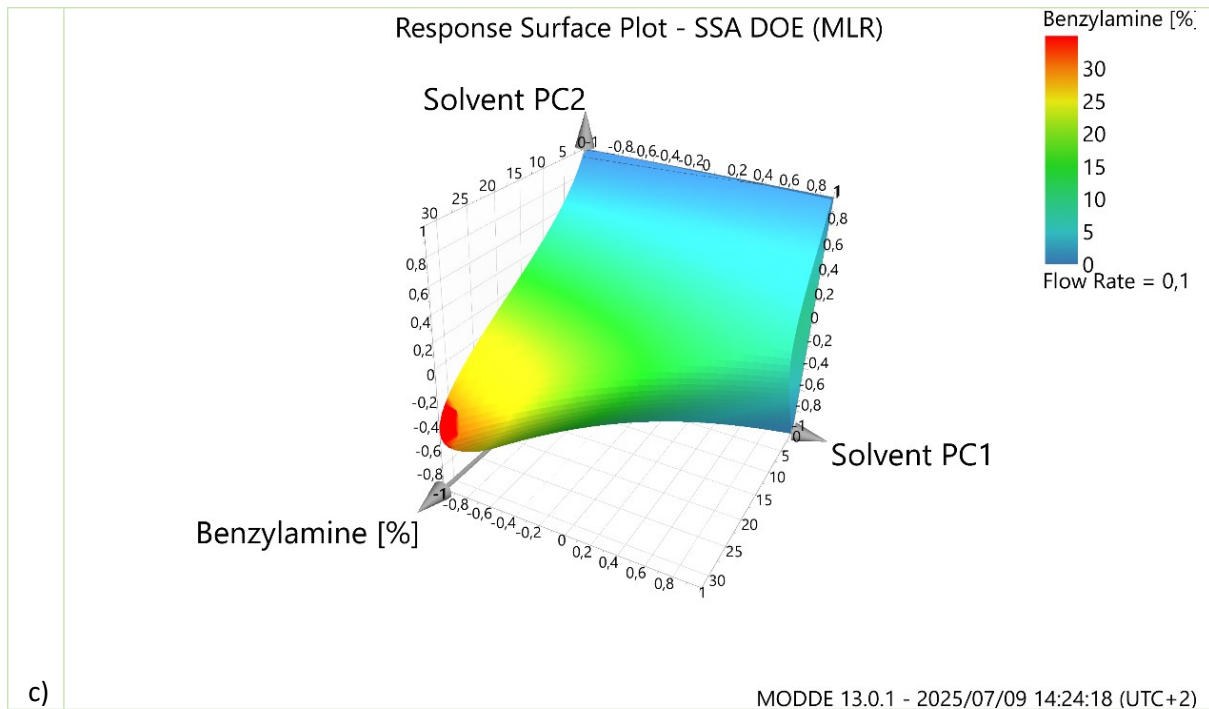

Supplement: d6ra04582k1.pdf [file d6ra04582k1.pdf]
